# Supplementary material
Source: PubMed Central journal article supplement (PMC10062458)
Supplement: NIHMS1850781-supplement-Supplemental_Publication_Material.pdf [file NIHMS1850781-supplement-Supplemental_Publication_Material.pdf]

## **SUPPLEMENTAL MATERIALS**

Figures S1 – S6

Tables S1 – S5

## SUPPLEMENTAL FIGURES

### **Supplemental Figure S1. Schematic workflow for RNA-sequencing and phosphoproteomics.**

Experimental and bioinformatics details for samples utilized in this study for RNA-sequencing (Top Panel) and phosphoproteomics (Bottom Panel) analysis, including the number of tissue samples, transcript and phosphopeptides identified and computational analysis and filtering. Two main comparisons were carried out between all heart failure and donor samples (comparison 1) and between responders and non-responders (comparison 2) for these two analyses platforms.

### **Supplemental Figure S2. Assessment of normality and equal variance in proteomics data.**

To assess the phosphopeptide data for normality and equal variance we pooled the data for all identified peptides (blue) for each patient sample, graphed on individual histograms, into 22 bins and plotted the log<sub>2</sub> intensities for all phosphopeptides (x-axis) against the count (y-axis). Red shows data plotted for only the phosphopeptides that were identified as differentially abundant between Control, Responders and Non-Responders. X-axis label also includes a unique identifier code for each patient sample. **A**, One representative histogram is enlarged for each of the three groups to allow easy visualization and comparison for: Control, Non-Responder and Responder. **B**, Histograms for every sample analyzed in this study are included to compare normality and variance. These histograms show that in the total phosphopeptide dataset there are very little overall differences in the total number and intensity of phosphopeptides identified (blue), which is to be expected, however, when examining only the phosphopeptides which are differential abundant between groups (red) there are discernable differences which reflect the quantitative changes observed in this subfraction of the data, which is to be expected. **C**, Normal Q-Q plot generated in Prism 9.3.1. further confirmed normality and equal variance across all samples in the phosphoproteomic data set. When looking at sorted sample values on the x-axis (log<sub>2</sub> intensities

for all phosphopeptides) compared to theoretical (predicted) values on the y-axis for a normal Gaussian distribution, we can see an overall linear trend in the association of actual and predicted values, indicating a normal distribution of the data.

**Supplemental Figure S3. Phosphopeptide enrichment from myocardial tissue.**

Phosphopeptides were enriched with titanium dioxide beads from myocardial tissue lysates and analyzed on an Orbitrap Velos Pro mass spectrometer. The percent enrichment for each sample was calculated as the ratio of phosphorylated peptides identified to all peptides identified.

**Supplemental Figure S4. Comparisons of studies examining cardiac tissue from heart failure patients.** Comparison between differentially abundant transcripts and phosphopeptides identified in this study and previously published data sets utilizing **A**, RNA-sequencing, **B**, microarrays and **C**, proteomics to interrogate tissue samples from heart failure patients.

**Supplemental Figure S5. Patient demographics incorporated into proteomics data.** We utilized principal component analysis (PCA) to compare the molecular differences in each patient sample, between responders and non-responders, with their, **A**, age ( $\geq$  or  $<$  50 years), or **B**, sex, and shows no clustering between biological replicates (although technical replicates should and do cluster). This data suggests that the molecular differences identified in the proteomics data are consistent and reproducible regardless of the sex or age of the patient in this dataset.

**Supplemental Figure S6. Binary comparisons of enriched processes and pathways in both – omics datasets.** We performed binary comparisons of the top enriched processes and pathways (p-value  $<0.01$ ) in both RNA-sequencing and phosphoproteomics data to identify the terms common in both analyses. This is not a comparison of individual transcripts or phosphorylated proteins instead it compares the gene ontology and pathways terms enriched after bioinformatics

analyses of the data using the DAVID platform. This included comparisons of terms from donor vs non-responder, donor vs responder and non-responder vs responder.

## **SUPPLEMENTAL TABLES**

**Supplemental Table S1. Clinical characteristics of heart failure patients (A) and donors (B) used in the RNA-Sequencing analysis.** RNA Sequencing analysis was performed on 84 heart failure patients and 9 donor hearts not allocated for heart transplantation due to non-cardiac reasons were used as normal controls. Clinical characteristics were captured for the 84 heart failure patients at the time of LVAD implantation. In addition, serial monitoring by echocardiography assessed LVEF (left ventricular ejection fraction) and LVEDD (left ventricular end diastolic dimension) values prior to device implantation (pre-LVAD) and 6 months post-implantation (post-LVAD) to differentiate between responders (n=25) and non-responders (n=59) in the heart failure patients. Demographic information for the normal controls is also presented. P-values were calculated using the Student's t-test with equal or unequal variances as appropriate for continuous variables, and the chi-squared test or Fisher's exact test as appropriate for categorical variables. +/- values indicate standard error of the mean (SEM).

**Supplemental Table S2. Clinical characteristics of heart failure patients (A) and donors (B) used in the proteomics analysis** Proteomics analysis was performed on 29 heart failure patients and 10 donor hearts not allocated for heart transplantation due to non-cardiac reasons were used as normal controls. Clinical characteristics were captured for the 29 heart failure patients at the time of LVAD implantation. In addition, serial monitoring by echocardiography assessed LVEF (left ventricular ejection fraction) and LVEDD (left ventricular end diastolic dimension) values prior to device implantation (pre-LVAD) and 6 months post-implantation (post-LVAD) to differentiate between responders (n=6) and non-responders (n=23) in the heart failure patients. Demographic information for the normal controls is also presented. P-values were calculated using the Student's t-test with equal or unequal variances as appropriate for continuous variables, and

the chi-squared test or Fisher's exact test as appropriate for categorical variables. +/- values indicate standard error of the mean (SEM).

**Supplemental Table S3. Transcripts differentially abundant in heart failure patients identified by RNA-Sequencing analysis.**

**Supplemental Table S4. Phosphorylated peptides differentially abundant in heart failure patients identified by mass spectrometry.**

**Supplemental Table S5. Phosphorylated peptides differentially abundant in patients who respond positively to LVAD unloading (responders).**

## RNA-Sequencing

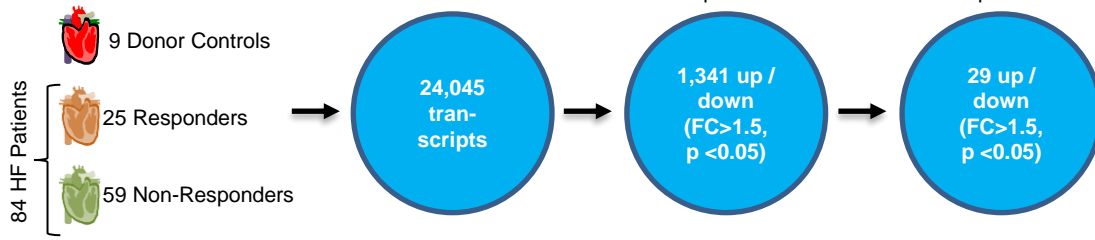

## Phosphoproteomics

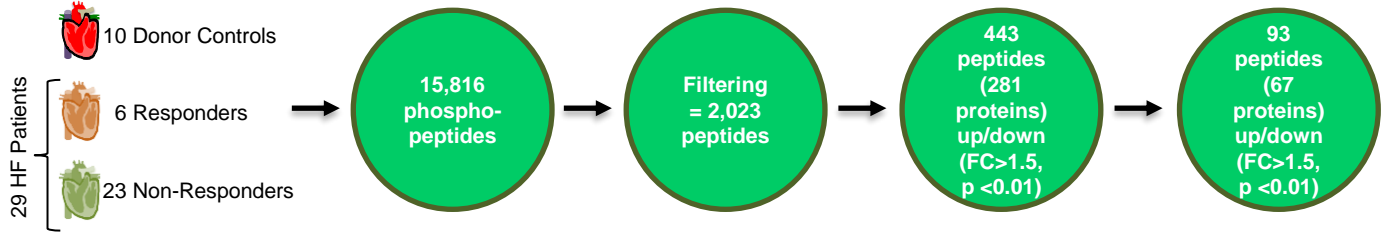

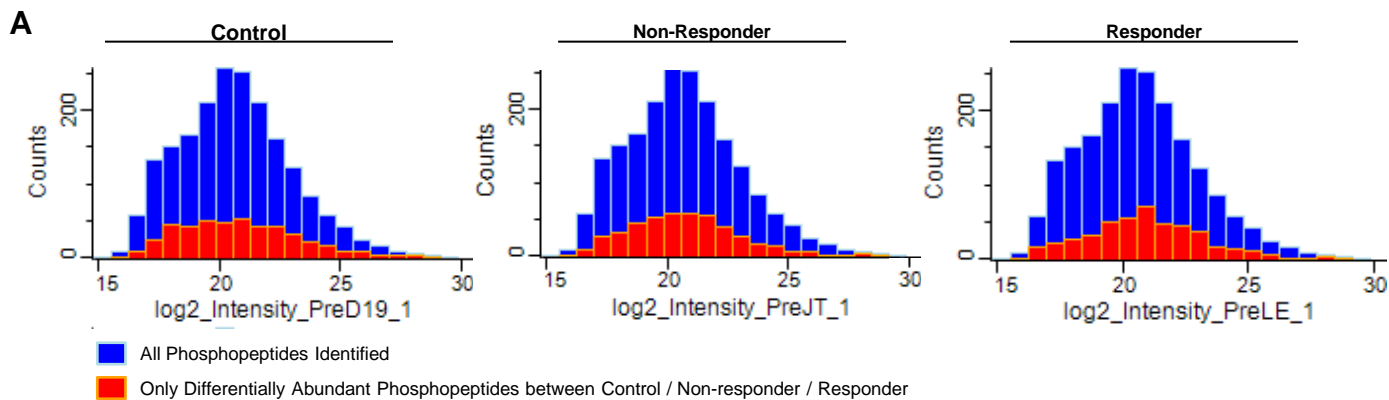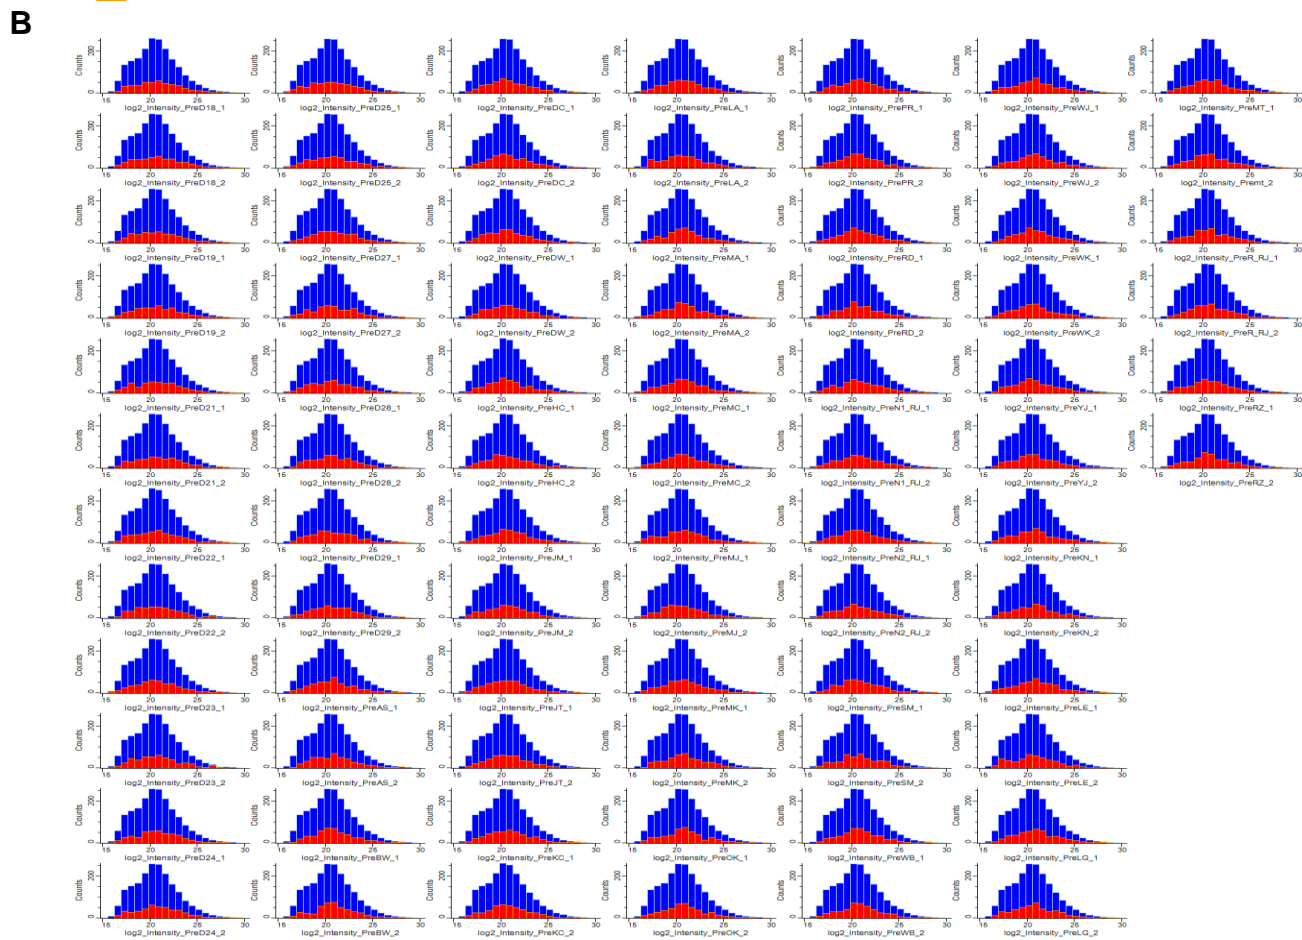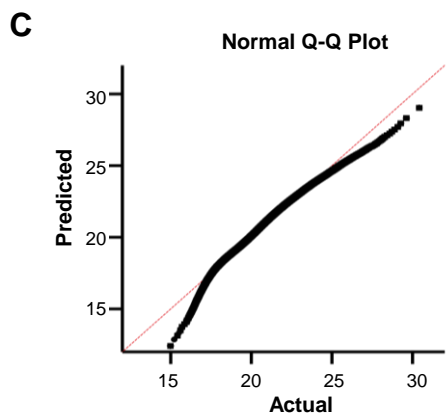



### Phosphopeptide Enrichment

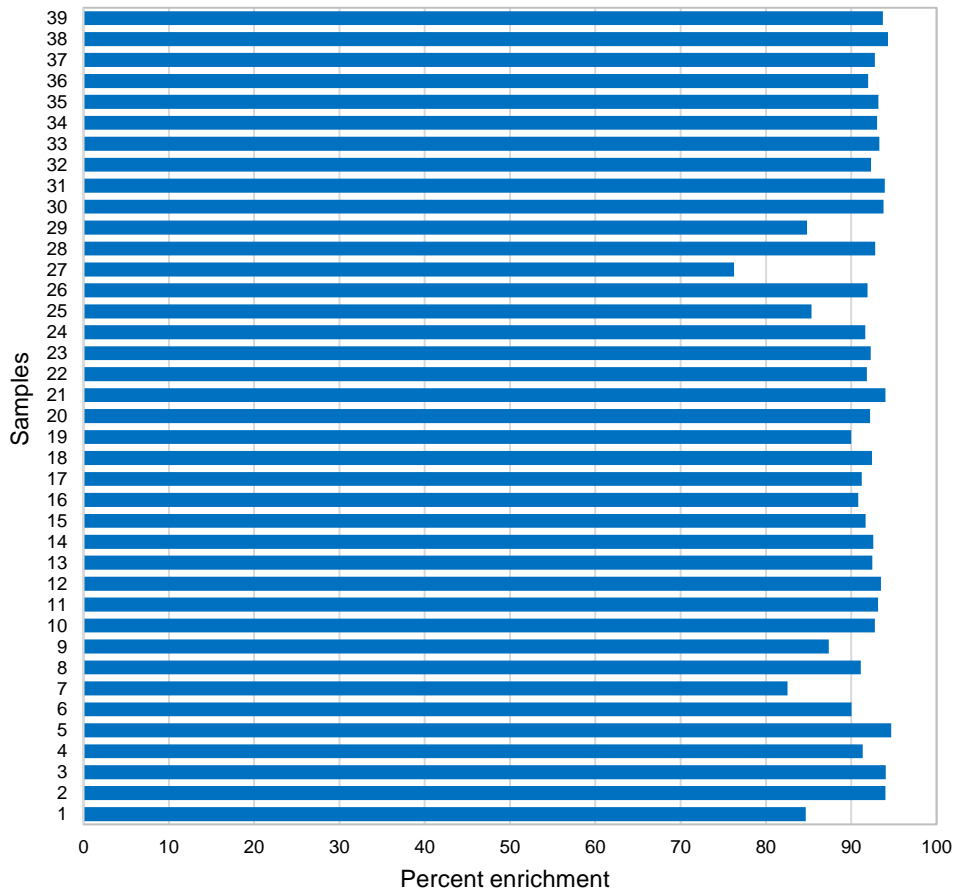



**A**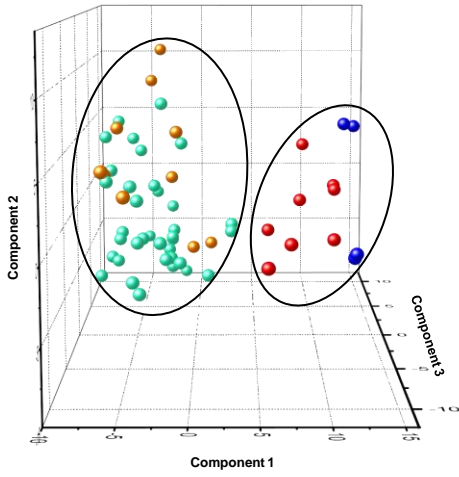**Top View**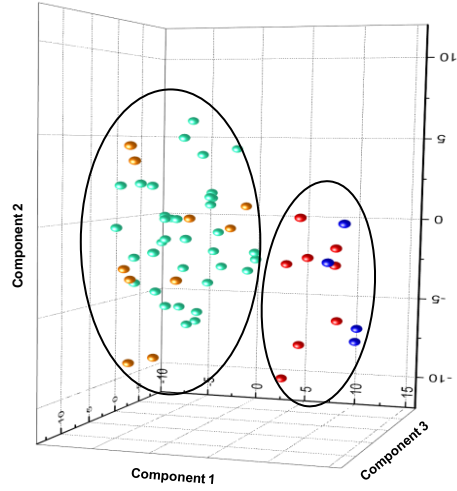

- Non-Responder Age ≤49
- Non-Responder Age ≥50
- Responder Age ≤49
- Responder Age ≥50

**B**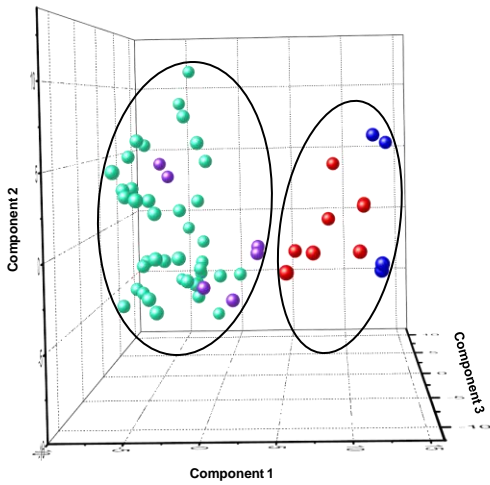**Top View**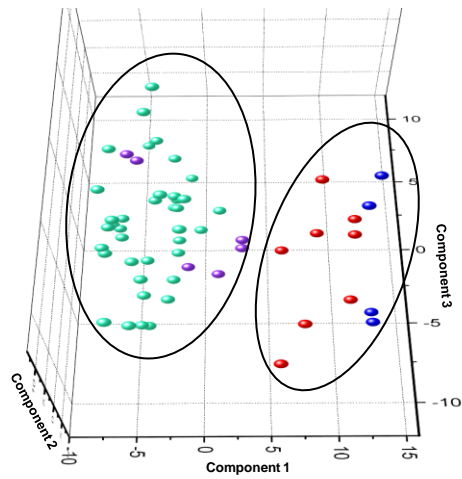

- Non-Responder Male
- Non-Responder Female
- Responder Male
- Responder Female

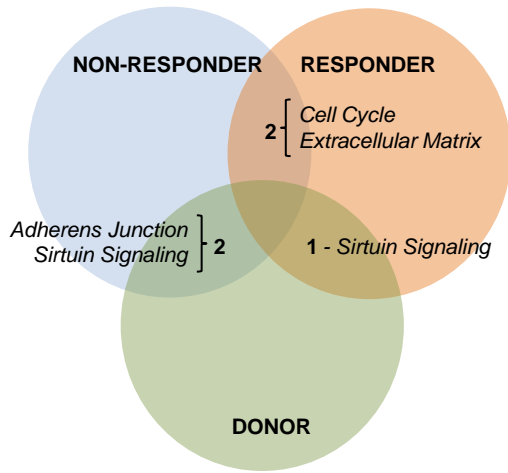

| Variable                                           | Responders<br>N=25 (mean ± SE) | Non-Responders<br>N=59 (mean ± SE) | p-value |
|----------------------------------------------------|--------------------------------|------------------------------------|---------|
| Male sex, n (%)                                    | 17 (68)                        | 53 (90)                            | 0.01    |
| Age at LVAD implantation, years                    | 50±4                           | 59±2                               | 0.06    |
| <b>Pre-LVAD</b>                                    |                                |                                    |         |
| LVEDD, cm                                          | 6.4±0.2                        | 7.0±0.1                            | 0.04    |
| LVEF, %                                            | 20±1                           | 19±1                               | 0.38    |
| <b>Post-LVAD</b>                                   |                                |                                    |         |
| LVEDD, cm                                          | 4.5±0.1                        | 6.3±0.1                            | <0.001  |
| LVEF, %                                            | 47±2                           | 21±1                               | <0.001  |
| <b>HF Etiology</b>                                 |                                |                                    |         |
| Ischemic cardiomyopathy, n (%)                     | 6 (24)                         | 22 (37)                            |         |
| Non-ischemic cardiomyopathy, n (%)                 | 19 (76)                        | 37 (63)                            |         |
| <b>New York Heart Association Functional Class</b> |                                |                                    |         |
| III, n (%)                                         | 8 (32)                         | 13 (22)                            |         |
| IV, n (%)                                          | 17 (68)                        | 46 (78)                            |         |
| Duration of HF symptoms, months                    | 36±12                          | 106±12                             | <0.001  |
| Systolic Blood Pressure, mmHg                      | 105±3                          | 104±2                              | 0.69    |
| Diastolic Blood Pressure, mmHg                     | 66±3                           | 68±1                               | 0.53    |
| Mean Right Atrial Pressure, mmHg                   | 11±1                           | 11±1                               | 0.53    |
| Systolic Pulmonary Artery Pressure, mmHg           | 52±3                           | 54±2                               | 0.65    |
| Diastolic Pulmonary Artery Pressure, mmHg          | 24±2                           | 26±1                               | 0.50    |
| Pulmonary Capillary Wedge Pressure, mmHg           | 24±2                           | 25±1                               | 0.80    |
| Cardiac Index, L/min/m <sup>2</sup>                | 2.0±0.1                        | 1.8±0.1                            | 0.25    |
| Pulmonary Vascular Resistance, Wood units          | 3.5±0.5                        | 3.9±0.4                            | 0.57    |
| B-type Natriuretic Peptide, pg/mL                  | 1710±337                       | 1338±134                           | 0.31    |
| Creatinine, mg/dL                                  | 1.2±0.1                        | 1.4±0.1                            | 0.06    |
| Sodium, mmol/L                                     | 134±1                          | 135±1                              | 0.79    |
| Hemoglobin, g/dL                                   | 13.0±0.5                       | 12.6±0.3                           | 0.48    |

*P-values were calculated using the Student's t-test with equal or unequal variances as appropriate for continuous variables, and the chi-squared test or Fisher's exact test as appropriate for categorical variables. +/- values indicate standard error of the mean (SEM).*

| <b>Variable</b>                           | <b>Donors N=9<br/>(mean ± SE)</b> |
|-------------------------------------------|-----------------------------------|
| Male, n (%)                               | 3 (33.3)                          |
| Age, years                                | 44.7±2.3                          |
| Weight, Kg                                | 68.6±6.2                          |
| Cause of death                            |                                   |
| Head trauma, n (%)                        | 6 (66.7)                          |
| CVA-Stroke/ ICH-Stroke, n (%)             | 2 (22.2)                          |
| CNS Tumor/Intracerebral Hemorrhage, n (%) | 1 (11.1)                          |

| Variable                                           | Responders<br>N=6 (mean ± SE) | Non-Responders<br>N=23 (mean ± SE) | p-value |
|----------------------------------------------------|-------------------------------|------------------------------------|---------|
| Male sex, n (%)                                    | 4 (66.7)                      | 20 (86.9)                          | 0.27    |
| Age at LVAD implantation, years                    | 44±12                         | 59±3                               | 0.27    |
| <b>Pre-LVAD</b>                                    |                               |                                    |         |
| LVEDD, cm                                          | 6.1±0.3                       | 7.1±0.3                            | 0.07    |
| LVEF, %                                            | 17±1                          | 16±1                               | 0.86    |
| <b>Post-LVAD</b>                                   |                               |                                    |         |
| LVEDD, cm                                          | 4.2±0.2                       | 6.5±0.3                            | <0.001  |
| LVEF, %                                            | 45±5                          | 21±2                               | <0.001  |
| <b>HF Etiology</b>                                 |                               |                                    |         |
| Ischemic cardiomyopathy, n (%)                     | 1 (16.7)                      | 5 (21.7)                           |         |
| Non-ischemic cardiomyopathy, n (%)                 | 5 (83.3)                      | 18 (78.3)                          |         |
| <b>New York Heart Association Functional Class</b> |                               |                                    |         |
| III, n (%)                                         | 2 (33.3)                      | 5 (21.7)                           |         |
| IV, n (%)                                          | 4 (66.7)                      | 18 (78.3)                          |         |
| Duration of HF symptoms, months                    | 36±22                         | 89±12                              | 0.05    |
| Systolic Blood Pressure, mmHg                      | 102±4                         | 102±3                              | 0.96    |
| Diastolic Blood Pressure, mmHg                     | 64±4                          | 70±2                               | 0.20    |
| Mean Right Atrial Pressure, mmHg                   | 13±3                          | 12±1                               | 0.93    |
| Systolic Pulmonary Artery Pressure, mmHg           | 53±7                          | 61±3                               | 0.18    |
| Diastolic Pulmonary Artery Pressure, mmHg          | 28±3                          | 27±2                               | 0.72    |
| Pulmonary Capillary Wedge Pressure, mmHg           | 27±4                          | 28±2                               | 0.91    |
| Cardiac Index, L/min/m <sup>2</sup>                | 2.4±0.4                       | 1.5±0.1                            | 0.09    |
| Pulmonary Vascular Resistance, Wood units          | 3.0±1.0                       | 4.7±0.7                            | 0.21    |
| B-type Natriuretic Peptide, pg/mL                  | 2442±765                      | 1475±232                           | 0.11    |
| Creatinine, mg/dL                                  | 1.1±0.2                       | 1.4±0.1                            | 0.16    |
| Sodium, mmol/L                                     | 133±3                         | 133±1                              | 0.93    |
| Hemoglobin, g/dL                                   | 11.5±0.8                      | 12.5±0.5                           | 0.34    |

*P-values were calculated using the Student's t-test with equal or unequal variances as appropriate for continuous variables, and the chi-squared test or Fisher's exact test as appropriate for categorical variables. +/- values indicate standard error of the mean (SEM).*

| <b>Variable</b>                  | <b>Donors N=10<br/>(mean ± SE)</b> |
|----------------------------------|------------------------------------|
| Male, n (%)                      | 3 (30)                             |
| Age, years                       | 45±2                               |
| Weight, Kg                       | 73±6                               |
| Cause of death                   |                                    |
| Head trauma, n (%)               | 7 (70)                             |
| CVA-Stroke/ ICH-Stroke, n (%)    | 2 (20)                             |
| Anoxia/ Drug intoxication, n (%) | 1 (10)                             |



**Supplemental Table S3**

| Gene            | Gene Name   | log2 Fold Change | p-value    | adj p-value |
|-----------------|-------------|------------------|------------|-------------|
| ENSG00000145416 | March1      | -0.840128912     | 0.000272   | 0.002227476 |
| ENSG00000107331 | ABCA2       | 0.757229265      | 4.32E-09   | 2.03E-07    |
| ENSG00000167972 | ABCA3       | 0.672803358      | 1.27E-10   | 9.58E-09    |
| ENSG00000154258 | ABCA9       | -0.796829823     | 5.20E-10   | 3.24E-08    |
| ENSG00000006071 | ABCC8       | 1.696712767      | 2.14E-11   | 2.13E-09    |
| ENSG00000118777 | ABCG2       | 1.599469414      | 7.87E-19   | 5.46E-16    |
| ENSG00000164074 | ABHD18      | 0.736702737      | 1.80E-05   | 0.000240614 |
| ENSG00000140526 | ABHD2       | 0.96422667       | 1.37E-15   | 4.32E-13    |
| ENSG00000166016 | ABTB2       | 0.660785726      | 0.00030933 | 0.002477265 |
| ENSG00000227249 | AC000374.1  | -1.154709655     | 1.56E-07   | 4.30E-06    |
| ENSG00000283399 | AC004381.8  | -0.80394707      | 0.00030044 | 0.002418472 |
| ENSG00000250497 | AC007126.1  | -1.528696558     | 2.95E-09   | 1.46E-07    |
| ENSG00000267216 | AC010642.1  | 0.602605558      | 0.00057167 | 0.004075712 |
| ENSG00000231013 | AC013275.2  | -1.39019808      | 3.43E-05   | 0.00040577  |
| ENSG00000235978 | AC018816.3  | 1.011079564      | 3.40E-07   | 8.34E-06    |
| ENSG00000224713 | AC025165.8  | -0.881295173     | 0.00074883 | 0.00503998  |
| ENSG00000225649 | AC064875.2  | 0.595178547      | 0.01218351 | 0.046233813 |
| ENSG00000229023 | AC067945.3  | -0.65439111      | 0.00037856 | 0.002919599 |
| ENSG00000237753 | AC079922.3  | 0.592231224      | 0.00370074 | 0.018215525 |
| ENSG00000157766 | ACAN        | 1.140577224      | 3.75E-05   | 0.000437336 |
| ENSG00000159640 | ACE         | 1.003574611      | 9.67E-07   | 2.05E-05    |
| ENSG00000151726 | ACSL1       | -0.723235521     | 1.36E-06   | 2.71E-05    |
| ENSG00000005187 | ACSM3       | -0.922406497     | 2.10E-05   | 0.000271383 |
| ENSG00000148848 | ADAM12      | 1.246536331      | 1.69E-05   | 0.000228242 |
| ENSG00000135074 | ADAM19      | 0.900450692      | 1.43E-07   | 4.03E-06    |
| ENSG00000160323 | ADAMTS13    | 0.865022557      | 1.33E-07   | 3.79E-06    |
| ENSG00000138316 | ADAMTS14    | 1.133548906      | 1.26E-05   | 0.000177737 |
| ENSG00000154736 | ADAMTS5     | -0.726916257     | 0.00046922 | 0.003473402 |
| ENSG00000203804 | ADAMTSL4-AS | 0.599198119      | 0.0003587  | 0.00279483  |
| ENSG00000105963 | ADAP1       | 1.025303836      | 3.01E-06   | 5.35E-05    |
| ENSG00000174233 | ADCY6       | 0.708163043      | 4.65E-11   | 4.11E-09    |
| ENSG00000078549 | ADCYAP1R1   | -0.97051694      | 6.92E-06   | 0.000107889 |
| ENSG00000135298 | ADGRB3      | -0.761588732     | 6.79E-08   | 2.14E-06    |
| ENSG00000112414 | ADGRG6      | -1.086495235     | 2.38E-10   | 1.64E-08    |
| ENSG00000196616 | ADH1B       | -1.62868427      | 7.92E-11   | 6.46E-09    |
| ENSG00000248144 | ADH1C       | -0.969968963     | 0.00025933 | 0.002146118 |
| ENSG00000181092 | ADIPOQ      | 0.820056933      | 0.0010009  | 0.00640105  |
| ENSG00000106624 | AEBP1       | 1.593809531      | 2.78E-09   | 1.39E-07    |
| ENSG00000232855 | AF131217.1  | -0.990384081     | 1.61E-08   | 6.20E-07    |
| ENSG00000196526 | AFAP1       | 0.614676073      | 2.27E-05   | 0.000289436 |
| ENSG00000144218 | AFF3        | 0.594768249      | 1.04E-05   | 0.000151047 |
| ENSG00000169692 | AGPAT2      | 0.620483181      | 1.45E-05   | 0.000201118 |

|                 |            |              |            |             |
|-----------------|------------|--------------|------------|-------------|
| ENSG00000188157 | AGRN       | 0.944499998  | 3.10E-07   | 7.72E-06    |
| ENSG00000144891 | AGTR1      | -0.865538373 | 6.69E-05   | 0.000705437 |
| ENSG00000204472 | AIF1       | -0.657775008 | 0.0049363  | 0.022766675 |
| ENSG00000155085 | AK9        | -0.732662572 | 8.07E-13   | 1.18E-10    |
| ENSG00000197976 | AKAP17A    | 0.701800601  | 1.01E-11   | 1.15E-09    |
| ENSG00000187134 | AKR1C1     | -0.765152776 | 2.00E-05   | 0.000261622 |
| ENSG00000196139 | AKR1C3     | -0.735296566 | 4.64E-07   | 1.10E-05    |
| ENSG00000170017 | ALCAM      | -0.810183447 | 0.00095484 | 0.00615578  |
| ENSG00000165092 | ALDH1A1    | -0.70655352  | 0.00019362 | 0.00169449  |
| ENSG00000159423 | ALDH4A1    | 0.60519983   | 5.14E-05   | 0.000566725 |
| ENSG00000012779 | ALOX5      | -0.620758902 | 0.00370348 | 0.018221665 |
| ENSG00000132965 | ALOX5AP    | -1.361138083 | 3.86E-09   | 1.85E-07    |
| ENSG00000136383 | ALPK3      | 0.705125533  | 1.22E-07   | 3.54E-06    |
| ENSG00000162551 | ALPL       | -0.681086653 | 0.00015565 | 0.00141203  |
| ENSG00000155754 | ALS2CR11   | -1.032923769 | 2.03E-05   | 0.000264881 |
| ENSG00000123505 | AMD1       | -0.844775961 | 1.30E-21   | 1.62E-18    |
| ENSG00000214274 | ANG        | -0.590583388 | 0.00059157 | 0.004174622 |
| ENSG00000154188 | ANGPT1     | -0.720952025 | 0.00027886 | 0.002275739 |
| ENSG00000091879 | ANGPT2     | 0.587726914  | 0.01072641 | 0.041987898 |
| ENSG00000171819 | ANGPTL7    | 0.895156007  | 0.00211806 | 0.011636667 |
| ENSG00000148677 | ANKRD1     | 0.609810995  | 0.00085508 | 0.005615659 |
| ENSG00000165887 | ANKRD2     | -0.882858705 | 0.00432795 | 0.020605814 |
| ENSG00000164236 | ANKRD33B   | 1.356878627  | 1.34E-15   | 4.32E-13    |
| ENSG00000131620 | ANO1       | 0.827778082  | 9.23E-06   | 0.000136923 |
| ENSG00000074855 | ANO8       | 0.751534385  | 3.65E-08   | 1.25E-06    |
| ENSG00000166825 | ANPEP      | -0.878709811 | 0.00042163 | 0.003182103 |
| ENSG00000169604 | ANTXR1     | 0.711099483  | 0.00097107 | 0.006243501 |
| ENSG00000138772 | ANXA3      | -0.80980952  | 8.43E-07   | 1.83E-05    |
| ENSG00000131471 | AOC3       | 0.797087451  | 0.00015933 | 0.001438709 |
| ENSG00000138356 | AOX1       | -1.15425274  | 6.62E-06   | 0.00010387  |
| ENSG00000184441 | AP001062.7 | 0.588173864  | 0.00075828 | 0.005089117 |
| ENSG00000113108 | APBB3      | 0.747481342  | 4.16E-12   | 5.11E-10    |
| ENSG00000105290 | APLP1      | 1.442891709  | 3.29E-15   | 9.82E-13    |
| ENSG00000124701 | APOBEC2    | -0.639942429 | 2.00E-07   | 5.33E-06    |
| ENSG00000189058 | APOD       | -1.10367275  | 5.19E-06   | 8.51E-05    |
| ENSG00000165272 | AQP3       | -0.722714747 | 0.00125885 | 0.007705084 |
| ENSG00000171885 | AQP4       | -0.921667813 | 0.00865433 | 0.035443517 |
| ENSG00000112379 | ARFGEF3    | 0.871055062  | 1.76E-05   | 0.000236151 |
| ENSG00000175220 | ARHGAP1    | 0.925885291  | 6.47E-19   | 4.76E-16    |
| ENSG00000004777 | ARHGAP33   | 0.961129155  | 1.43E-06   | 2.82E-05    |
| ENSG00000147799 | ARHGAP39   | 0.769194177  | 0.00045965 | 0.003414346 |
| ENSG00000136002 | ARHGEF4    | 1.16081035   | 1.75E-08   | 6.68E-07    |
| ENSG00000140691 | ARMC5      | 0.675204779  | 1.61E-07   | 4.42E-06    |

|                 |              |              |            |             |
|-----------------|--------------|--------------|------------|-------------|
| ENSG00000125449 | ARMC7        | 0.666624998  | 2.53E-06   | 4.60E-05    |
| ENSG00000135931 | ARMC9        | 0.762057391  | 2.50E-07   | 6.45E-06    |
| ENSG00000133794 | ARNTL        | -0.615575748 | 0.0052189  | 0.023800005 |
| ENSG00000029153 | ARNTL2       | 1.157705475  | 2.10E-08   | 7.89E-07    |
| ENSG00000281357 | ARRDC3-AS1   | 0.807932898  | 8.11E-06   | 0.000123275 |
| ENSG00000164291 | ARSK         | -0.604624397 | 1.24E-11   | 1.36E-09    |
| ENSG00000156219 | ART3         | -1.708427143 | 2.34E-23   | 3.24E-20    |
| ENSG00000111339 | ART4         | -0.67468809  | 0.00193965 | 0.010870233 |
| ENSG00000239388 | ASB14        | -0.987176927 | 4.50E-07   | 1.07E-05    |
| ENSG00000146809 | ASB15        | -0.784738674 | 6.61E-06   | 0.000103755 |
| ENSG00000005981 | ASB4         | -1.053180105 | 8.79E-07   | 1.89E-05    |
| ENSG00000102048 | ASB9         | 0.879037262  | 0.00207686 | 0.011459409 |
| ENSG00000169093 | ASMTL        | 0.61082656   | 9.40E-10   | 5.43E-08    |
| ENSG00000106819 | ASPN         | 0.946407666  | 5.25E-06   | 8.58E-05    |
| ENSG00000110046 | ATG2A        | 0.626559208  | 2.53E-09   | 1.28E-07    |
| ENSG00000206190 | ATP10A       | 0.831446648  | 2.06E-05   | 0.000267202 |
| ENSG00000133657 | ATP13A3      | 0.615804856  | 0.00029004 | 0.002350765 |
| ENSG00000166896 | ATP23        | -0.741021956 | 0.00027906 | 0.002275831 |
| ENSG00000171130 | ATP6V0E2     | 0.603868627  | 7.03E-06   | 0.000109263 |
| ENSG00000204934 | ATP6V0E2-AS1 | 0.601073072  | 0.00024068 | 0.002022973 |
| ENSG00000123191 | ATP7B        | 0.638567082  | 2.36E-09   | 1.21E-07    |
| ENSG00000107518 | ATRNL1       | 2.004659406  | 5.69E-14   | 1.18E-11    |
| ENSG00000160862 | AZGP1        | -1.276176225 | 1.87E-09   | 1.00E-07    |
| ENSG00000162630 | B3GALT2      | -0.92540825  | 1.16E-07   | 3.38E-06    |
| ENSG00000176597 | B3GNT5       | 0.838471956  | 2.54E-05   | 0.000316931 |
| ENSG00000237172 | B3GNT9       | 0.627766063  | 5.97E-07   | 1.35E-05    |
| ENSG00000118276 | B4GALT6      | -0.60142445  | 8.15E-05   | 0.000828894 |
| ENSG00000112182 | BACH2        | 0.880622506  | 2.01E-12   | 2.64E-10    |
| ENSG00000278910 | BANCR        | 1.022258693  | 0.00031569 | 0.002518794 |
| ENSG00000163093 | BBS5         | 0.812219828  | 2.71E-08   | 9.86E-07    |
| ENSG00000122507 | BBS9         | -0.919262459 | 6.79E-28   | 2.29E-24    |
| ENSG00000114200 | BCHE         | -0.815818864 | 1.50E-06   | 2.95E-05    |
| ENSG00000113916 | BCL6         | -0.842164527 | 4.02E-10   | 2.62E-08    |
| ENSG00000161940 | BCL6B        | 0.920936249  | 8.66E-07   | 1.87E-05    |
| ENSG00000151917 | BEND6        | 1.120845893  | 3.55E-06   | 6.18E-05    |
| ENSG00000182492 | BGN          | 0.778999373  | 0.00312971 | 0.01596479  |
| ENSG00000134107 | BHLHE40      | 0.638146654  | 0.00211241 | 0.011619453 |
| ENSG00000132840 | BHMT2        | -0.589538258 | 0.00114814 | 0.00712923  |
| ENSG00000151746 | BICD1        | 0.647217037  | 2.82E-07   | 7.14E-06    |
| ENSG0000023445  | BIRC3        | -0.872251035 | 1.30E-06   | 2.63E-05    |
| ENSG00000197299 | BLM          | -1.586534954 | 4.55E-15   | 1.32E-12    |
| ENSG00000101144 | BMP7         | -1.31954231  | 4.59E-05   | 0.000517235 |
| ENSG00000164619 | BMPER        | -1.245695593 | 6.99E-06   | 0.000108896 |

|                 |               |              |            |             |
|-----------------|---------------|--------------|------------|-------------|
| ENSG00000144857 | BOC           | 0.756853131  | 2.95E-06   | 5.24E-05    |
| ENSG00000176720 | BOK           | 0.780323634  | 0.00015866 | 0.001434342 |
| ENSG00000185024 | BRF1          | 0.625312151  | 3.28E-11   | 3.07E-09    |
| ENSG00000162670 | BRINP3        | -1.034843171 | 0.00116908 | 0.007232571 |
| ENSG00000160469 | BRSK1         | 1.54133441   | 7.11E-17   | 3.22E-14    |
| ENSG00000148655 | C10orf11      | -1.254372032 | 1.39E-15   | 4.32E-13    |
| ENSG00000173715 | C11orf80      | 0.90539667   | 7.24E-06   | 0.00011219  |
| ENSG00000227051 | C14orf132     | 0.722483194  | 0.00142669 | 0.008509273 |
| ENSG00000179476 | C14orf28      | -0.631146152 | 5.35E-09   | 2.43E-07    |
| ENSG00000185347 | C14orf80      | 0.847111384  | 0.00036492 | 0.002836575 |
| ENSG00000261652 | C15orf65      | -0.844989232 | 6.05E-08   | 1.94E-06    |
| ENSG00000153446 | C16orf89      | 1.388718002  | 3.11E-08   | 1.11E-06    |
| ENSG00000279020 | C18orf15      | 0.754376898  | 0.00021405 | 0.001843853 |
| ENSG00000180999 | C1orf105      | -2.074166823 | 1.01E-18   | 6.63E-16    |
| ENSG00000162817 | C1orf115      | -0.758975961 | 3.00E-10   | 2.01E-08    |
| ENSG00000131591 | C1orf159      | 0.637962571  | 1.02E-05   | 0.000148645 |
| ENSG00000143110 | C1orf162      | -0.592216213 | 5.25E-05   | 0.000575808 |
| ENSG00000173369 | C1QB          | -0.959103269 | 0.00028565 | 0.002321329 |
| ENSG00000159189 | C1QC          | -0.783887158 | 0.00089615 | 0.005842141 |
| ENSG00000139178 | C1RL          | -0.732766875 | 5.08E-07   | 1.18E-05    |
| ENSG00000174403 | C20orf166-AS1 | 0.632351918  | 2.76E-05   | 0.000338514 |
| ENSG00000160298 | C21orf58      | 0.60381027   | 0.00177828 | 0.010156615 |
| ENSG00000188511 | C22orf34      | 0.707896736  | 0.00021712 | 0.00186216  |
| ENSG00000187699 | C2orf88       | -0.662751003 | 5.25E-11   | 4.49E-09    |
| ENSG00000125730 | C3            | -1.036067808 | 2.17E-05   | 0.000277959 |
| ENSG00000171860 | C3AR1         | -0.64736795  | 0.00516834 | 0.023605979 |
| ENSG00000112936 | C7            | -1.024942449 | 2.39E-07   | 6.22E-06    |
| ENSG00000186354 | C9orf47       | -0.641422441 | 7.75E-05   | 0.000795739 |
| ENSG00000063180 | CA11          | -0.747969221 | 8.92E-05   | 0.000891186 |
| ENSG00000164879 | CA3           | 1.069531209  | 0.00015379 | 0.00139848  |
| ENSG00000007402 | CACNA2D2      | 0.69449463   | 0.00022728 | 0.001929667 |
| ENSG00000175161 | CADM2         | -0.767063568 | 0.0034831  | 0.017321469 |
| ENSG00000162706 | CADM3         | -1.310160082 | 6.41E-10   | 3.90E-08    |
| ENSG00000081803 | CADPS2        | -0.637162065 | 5.24E-10   | 3.25E-08    |
| ENSG00000058404 | CAMK2B        | 0.693598847  | 8.40E-11   | 6.80E-09    |
| ENSG00000132357 | CARD6         | -0.623296657 | 2.17E-13   | 3.60E-11    |
| ENSG00000172508 | CARNS1        | 0.833417772  | 5.86E-07   | 1.33E-05    |
| ENSG00000103021 | CCDC113       | 1.175491089  | 1.72E-24   | 2.89E-21    |
| ENSG00000233098 | CCDC144NL-AS1 | 0.845557294  | 0.00059056 | 0.00417116  |
| ENSG00000256304 | CCDC150P1     | 0.606591174  | 1.72E-05   | 0.000231594 |
| ENSG00000175820 | CCDC168       | 1.160672467  | 1.04E-08   | 4.27E-07    |
| ENSG00000109881 | CCDC34        | 0.70739788   | 0.00074064 | 0.005000582 |
| ENSG00000145075 | CCDC39        | -1.024495243 | 8.56E-07   | 1.86E-05    |

|                 |               |              |            |             |
|-----------------|---------------|--------------|------------|-------------|
| ENSG00000104983 | CCDC61        | 0.634462081  | 5.29E-05   | 0.000579998 |
| ENSG00000198624 | CCDC69        | -0.880782354 | 6.86E-26   | 1.24E-22    |
| ENSG00000091986 | CCDC80        | 1.075709844  | 1.32E-07   | 3.78E-06    |
| ENSG00000175602 | CCDC85B       | 0.701025449  | 0.00050013 | 0.003656295 |
| ENSG00000172156 | CCL11         | -1.131066923 | 4.24E-05   | 0.000484472 |
| ENSG00000110092 | CCND1         | 0.941493012  | 6.26E-24   | 9.84E-21    |
| ENSG00000113328 | CCNG1         | -0.601133667 | 2.27E-10   | 1.57E-08    |
| ENSG00000163823 | CCR1          | -1.118467908 | 2.13E-05   | 0.000274018 |
| ENSG00000170458 | CD14          | -0.974716322 | 2.01E-05   | 0.000262574 |
| ENSG00000177575 | CD163         | -1.397706164 | 7.38E-08   | 2.30E-06    |
| ENSG00000134061 | CD180         | -1.183616688 | 1.32E-06   | 2.66E-05    |
| ENSG00000091972 | CD200         | 0.748784258  | 0.00431817 | 0.020567574 |
| ENSG00000215039 | CD27-AS1      | 0.629087718  | 2.08E-08   | 7.81E-07    |
| ENSG00000161649 | CD300LG       | -0.598739765 | 0.004256   | 0.02033309  |
| ENSG00000241399 | CD302         | -0.664519779 | 1.34E-06   | 2.68E-05    |
| ENSG00000174059 | CD34          | -0.689544609 | 2.20E-08   | 8.22E-07    |
| ENSG00000135218 | CD36          | -0.803156013 | 2.07E-13   | 3.47E-11    |
| ENSG00000004468 | CD38          | -1.309039491 | 1.53E-14   | 3.81E-12    |
| ENSG00000066294 | CD84          | -0.792903947 | 5.17E-05   | 0.000569192 |
| ENSG00000167617 | CDC42EP5      | 0.631886819  | 0.00189162 | 0.010644096 |
| ENSG00000097046 | CDC7          | -0.813764276 | 0.00041289 | 0.003127184 |
| ENSG00000107736 | CDH23         | 1.041798808  | 1.58E-11   | 1.70E-09    |
| ENSG00000128536 | CDHR3         | -0.754809628 | 0.007065   | 0.030143231 |
| ENSG00000176749 | CDK5R1        | 0.765818012  | 7.86E-05   | 0.000805634 |
| ENSG00000129596 | CDO1          | -0.614561081 | 0.00041396 | 0.003133235 |
| ENSG00000245848 | CEBPA         | 0.856434717  | 0.00246694 | 0.013162033 |
| ENSG00000218739 | CEBPZOS       | -0.635917181 | 7.94E-09   | 3.39E-07    |
| ENSG00000075275 | CELSR1        | 0.913481835  | 1.59E-10   | 1.15E-08    |
| ENSG00000143126 | CELSR2        | 0.615795881  | 0.00020885 | 0.001806967 |
| ENSG00000115163 | CENPA         | 0.890995003  | 0.00249025 | 0.013268397 |
| ENSG00000138778 | CENPE         | -0.622458837 | 0.00227575 | 0.012334588 |
| ENSG00000166582 | CENPV         | -0.634314599 | 0.00072285 | 0.004914262 |
| ENSG00000111860 | CEP85L        | -1.285647849 | 1.10E-35   | 1.29E-31    |
| ENSG00000172831 | CES2          | -0.74896607  | 6.17E-08   | 1.97E-06    |
| ENSG00000163075 | CFAP221       | 0.593640354  | 0.00388691 | 0.018891316 |
| ENSG00000227082 | CH17-437K3.1  | 1.103479081  | 1.79E-06   | 3.42E-05    |
| ENSG00000275993 | CH507-42P11.1 | 0.828897478  | 0.00539389 | 0.024442013 |
| ENSG00000016391 | CHDH          | -1.190575276 | 8.42E-09   | 3.57E-07    |
| ENSG00000089199 | CHGB          | -0.798639732 | 0.00049353 | 0.003621499 |
| ENSG00000134121 | CHL1          | -1.970686559 | 1.26E-15   | 4.25E-13    |
| ENSG00000033100 | CHPF2         | 0.597064762  | 9.12E-09   | 3.82E-07    |
| ENSG00000104472 | CHRAC1        | -0.888146803 | 8.90E-13   | 1.29E-10    |
| ENSG00000101938 | CHRD1         | 1.075320605  | 0.00014752 | 0.001351239 |

|                 |          |              |            |             |
|-----------------|----------|--------------|------------|-------------|
| ENSG00000108556 | CHRNE    | 1.041042925  | 0.00034648 | 0.002718478 |
| ENSG00000175040 | CHST2    | 0.636589536  | 0.00361044 | 0.017845555 |
| ENSG00000122863 | CHST3    | 0.586758717  | 4.30E-07   | 1.03E-05    |
| ENSG00000183196 | CHST6    | 1.167105465  | 1.23E-05   | 0.000174466 |
| ENSG00000147119 | CHST7    | 0.790113134  | 0.00128763 | 0.007842546 |
| ENSG00000154080 | CHST9    | -0.79741714  | 0.01086129 | 0.042403813 |
| ENSG00000198108 | CHSY3    | 0.607238224  | 0.00283821 | 0.01479144  |
| ENSG00000179583 | CIITA    | 0.604010325  | 0.00084591 | 0.005567831 |
| ENSG00000114737 | CISH     | 1.320121367  | 1.22E-10   | 9.26E-09    |
| ENSG00000184113 | CLDN5    | 0.708642488  | 0.00613976 | 0.027032133 |
| ENSG00000105472 | CLEC11A  | 0.724131901  | 0.0004993  | 0.003654512 |
| ENSG00000069493 | CLEC2D   | -0.674324574 | 3.32E-07   | 8.20E-06    |
| ENSG00000172243 | CLEC7A   | -0.602661675 | 0.01298243 | 0.04850416  |
| ENSG00000070371 | CLTCL1   | 0.754468935  | 5.30E-13   | 7.95E-11    |
| ENSG00000132361 | CLUH     | 0.645093949  | 9.02E-08   | 2.70E-06    |
| ENSG00000144619 | CNTN4    | 0.709817219  | 0.0001256  | 0.001177956 |
| ENSG00000108797 | CNTNAP1  | 0.738212723  | 4.33E-07   | 1.04E-05    |
| ENSG00000106714 | CNTNAP3  | -0.834729157 | 0.00026801 | 0.002200143 |
| ENSG00000187955 | COL14A1  | 1.353167998  | 6.15E-09   | 2.73E-07    |
| ENSG00000084636 | COL16A1  | 1.06439366   | 7.00E-10   | 4.24E-08    |
| ENSG00000108821 | COL1A1   | 1.206754113  | 1.74E-05   | 0.000234497 |
| ENSG00000164692 | COL1A2   | 1.071888837  | 2.02E-06   | 3.80E-05    |
| ENSG00000171502 | COL24A1  | 0.886209639  | 9.66E-05   | 0.000949032 |
| ENSG00000188517 | COL25A1  | 0.647463347  | 0.00780404 | 0.032623379 |
| ENSG00000215018 | COL28A1  | -0.901702019 | 6.15E-05   | 0.000656705 |
| ENSG00000168542 | COL3A1   | 0.890614027  | 0.00015171 | 0.001382852 |
| ENSG00000130635 | COL5A1   | 0.901946025  | 7.37E-05   | 0.00076314  |
| ENSG00000171812 | COL8A2   | 1.04323032   | 1.44E-05   | 0.000200096 |
| ENSG00000112280 | COL9A1   | 0.826118417  | 0.0029374  | 0.01519086  |
| ENSG00000118004 | COLEC11  | -0.631918896 | 0.00237369 | 0.012759797 |
| ENSG00000198756 | COLGALT2 | 1.276264808  | 2.64E-16   | 1.06E-13    |
| ENSG00000206561 | COLQ     | 0.670922885  | 0.00211675 | 0.011635959 |
| ENSG00000105664 | COMP     | 1.504532437  | 1.30E-13   | 2.35E-11    |
| ENSG00000138495 | COX17    | -0.692102227 | 1.82E-08   | 6.90E-07    |
| ENSG00000160111 | CPAMD8   | -0.597573963 | 0.00606478 | 0.026797083 |
| ENSG00000214575 | CPEB1    | 0.813188327  | 0.00019352 | 0.001694286 |
| ENSG00000135678 | CPM      | -0.838041233 | 8.72E-06   | 0.000130809 |
| ENSG00000196353 | CPNE4    | -1.136075477 | 7.45E-06   | 0.000114892 |
| ENSG00000124772 | CPNE5    | 1.094972414  | 1.55E-05   | 0.000212386 |
| ENSG00000121898 | CPXM2    | 0.844854465  | 0.00058761 | 0.004160373 |
| ENSG00000203710 | CR1      | -0.791437804 | 0.00494247 | 0.022774119 |
| ENSG00000134376 | CRB1     | 0.880617131  | 0.00017919 | 0.001584682 |
| ENSG00000157613 | CREB3L1  | -0.778359734 | 3.78E-05   | 0.000439977 |



|                 |               |              |            |             |
|-----------------|---------------|--------------|------------|-------------|
| ENSG00000121005 | CRISPLD1      | 1.525724883  | 3.96E-08   | 1.34E-06    |
| ENSG00000215908 | CROCCP2       | 0.757772983  | 4.61E-06   | 7.71E-05    |
| ENSG00000121671 | CRY2          | 0.668605626  | 9.94E-10   | 5.72E-08    |
| ENSG00000109846 | CRYAB         | -0.666451278 | 1.52E-05   | 0.000209446 |
| ENSG00000103316 | CRYM          | 0.779332316  | 5.83E-08   | 1.88E-06    |
| ENSG00000141551 | CSNK1D        | 0.616473896  | 3.57E-08   | 1.23E-06    |
| ENSG00000173546 | CSPG4         | 0.787424555  | 4.77E-06   | 7.93E-05    |
| ENSG00000260139 | CSPG4P13      | 0.877116809  | 7.23E-05   | 0.000751659 |
| ENSG00000273237 | CTB-119C2.1   | -1.51117559  | 3.19E-19   | 2.59E-16    |
| ENSG00000267385 | CTB-50L17.14  | -0.665149768 | 0.00101825 | 0.006476193 |
| ENSG00000280061 | CTD-2001J20.1 | 0.649626631  | 0.00694694 | 0.029736397 |
| ENSG00000278934 | CTD-2006M22   | -0.856134382 | 1.07E-08   | 4.36E-07    |
| ENSG00000261434 | CTD-2083E4.7  | -0.779129237 | 0.00081199 | 0.005377602 |
| ENSG00000249116 | CTD-2194D22.  | -1.039562807 | 1.83E-11   | 1.90E-09    |
| ENSG00000250891 | CTD-2281M20   | -0.664226824 | 0.00315124 | 0.016053752 |
| ENSG00000268518 | CTD-2545M3.8  | 0.817084631  | 0.0049289  | 0.022750338 |
| ENSG00000267577 | CTD-2587H24.  | 1.160775892  | 1.53E-07   | 4.25E-06    |
| ENSG00000232098 | CTD-2619J13.1 | 0.591574602  | 0.00060044 | 0.004228334 |
| ENSG00000180458 | CTD-3064H18.  | 0.637449844  | 0.00055943 | 0.004007319 |
| ENSG00000271959 | CTD-3064M3.7  | 0.990825782  | 1.43E-06   | 2.83E-05    |
| ENSG00000188897 | CTD-3088G3.8  | 0.898755735  | 4.97E-06   | 8.19E-05    |
| ENSG00000118523 | CTGF          | 1.375511395  | 2.97E-07   | 7.45E-06    |
| ENSG00000164932 | CTHRC1        | 1.035949218  | 0.00025411 | 0.002110293 |
| ENSG00000143387 | CTSK          | 0.847334135  | 1.17E-06   | 2.41E-05    |
| ENSG00000142544 | CTU1          | 0.822110284  | 0.00052725 | 0.003813163 |
| ENSG00000121966 | CXCR4         | 0.949279575  | 0.00023303 | 0.001967127 |
| ENSG00000165168 | CYBB          | -1.092114002 | 2.21E-06   | 4.08E-05    |
| ENSG00000003137 | CYP26B1       | 0.876343012  | 9.65E-05   | 0.000948483 |
| ENSG00000142973 | CYP4B1        | -1.155936654 | 0.00028215 | 0.002297807 |
| ENSG00000001630 | CYP51A1       | 0.678334768  | 0.00040349 | 0.003070749 |
| ENSG00000142871 | CYR61         | 0.677480739  | 0.01286003 | 0.048148924 |
| ENSG00000205795 | CYS1          | 1.184744069  | 1.77E-08   | 6.74E-07    |
| ENSG00000152207 | CYSLTR2       | -0.655801511 | 9.60E-07   | 2.04E-05    |
| ENSG00000166265 | CYYR1         | -0.730553447 | 9.31E-15   | 2.49E-12    |
| ENSG00000276644 | DACH1         | -0.888965703 | 2.30E-07   | 6.02E-06    |
| ENSG00000164488 | DACT2         | 1.266890552  | 1.58E-06   | 3.07E-05    |
| ENSG00000167657 | DAPK3         | 0.595750349  | 6.05E-07   | 1.37E-05    |
| ENSG00000155368 | DBI           | -0.677097745 | 1.99E-09   | 1.05E-07    |
| ENSG00000105516 | DBP           | 0.745767085  | 0.00030287 | 0.002435487 |
| ENSG00000166341 | DCHS1         | 0.594699133  | 8.01E-07   | 1.76E-05    |
| ENSG00000204580 | DDR1          | 0.805993058  | 6.69E-08   | 2.12E-06    |
| ENSG00000185163 | DDX51         | 0.720333017  | 2.37E-10   | 1.64E-08    |
| ENSG00000205593 | DENND6B       | 0.745229608  | 0.0002152  | 0.001849954 |

|                 |             |              |            |             |
|-----------------|-------------|--------------|------------|-------------|
| ENSG00000077044 | DGKD        | 0.608589496  | 1.60E-09   | 8.67E-08    |
| ENSG00000157680 | DGKI        | 0.664834169  | 0.002348   | 0.012656341 |
| ENSG00000145214 | DGKQ        | 0.82937389   | 2.09E-07   | 5.53E-06    |
| ENSG00000278535 | DHRS11      | 0.887611326  | 1.96E-14   | 4.67E-12    |
| ENSG00000176124 | DLEU1       | -0.877410176 | 1.90E-12   | 2.50E-10    |
| ENSG00000151208 | DLG5        | 0.661499914  | 7.06E-09   | 3.07E-07    |
| ENSG00000080845 | DLGAP4      | 0.677331193  | 0.0003031  | 0.002436507 |
| ENSG00000128917 | DLL4        | 0.822190533  | 5.57E-06   | 9.02E-05    |
| ENSG00000100206 | DMC1        | 0.652151075  | 0.00274292 | 0.014393458 |
| ENSG00000114841 | DNAH1       | 0.773137925  | 5.01E-15   | 1.42E-12    |
| ENSG00000158486 | DNAH3       | -1.654990293 | 4.98E-11   | 4.34E-09    |
| ENSG00000224165 | DNAJC27-AS1 | 0.717399428  | 0.00015868 | 0.001434342 |
| ENSG00000235370 | DNM1P51     | 0.780758318  | 0.00048317 | 0.003558816 |
| ENSG00000272636 | DOC2B       | 0.983028273  | 2.30E-09   | 1.19E-07    |
| ENSG00000206052 | DOK6        | 1.261321605  | 4.93E-11   | 4.31E-09    |
| ENSG00000104885 | DOT1L       | 0.599991558  | 4.47E-05   | 0.000507487 |
| ENSG00000167261 | DPEP2       | 0.602326889  | 0.00822577 | 0.033970737 |
| ENSG00000143196 | DPT         | 0.635245836  | 0.00066331 | 0.004587551 |
| ENSG00000173852 | DPY19L1     | -0.69032601  | 7.83E-28   | 2.31E-24    |
| ENSG00000235436 | DPY19L2P4   | -0.761302198 | 0.00023382 | 0.001972402 |
| ENSG00000113657 | DPYSL3      | 0.649891048  | 2.30E-05   | 0.000292208 |
| ENSG00000137857 | DUOX1       | 0.712298836  | 0.00328281 | 0.016517035 |
| ENSG00000079393 | DUSP13      | -0.909122326 | 1.02E-07   | 3.03E-06    |
| ENSG00000149599 | DUSP15      | 1.501584919  | 1.17E-08   | 4.70E-07    |
| ENSG00000138166 | DUSP5       | 1.078684287  | 4.62E-07   | 1.09E-05    |
| ENSG00000184545 | DUSP8       | 0.597532101  | 0.00178771 | 0.010198098 |
| ENSG00000125971 | DYNLRB1     | -0.611791491 | 3.65E-05   | 0.00042804  |
| ENSG00000105204 | DYRK1B      | 1.17972237   | 1.01E-18   | 6.63E-16    |
| ENSG00000106823 | ECM2        | 0.629545756  | 0.00032816 | 0.002594599 |
| ENSG00000131080 | EDA2R       | 1.316818041  | 1.48E-10   | 1.07E-08    |
| ENSG00000164176 | EDIL3       | 1.163288465  | 4.35E-07   | 1.04E-05    |
| ENSG00000136160 | EDNRB       | -0.613396794 | 2.16E-05   | 0.000276992 |
| ENSG00000232472 | EEF1B2P3    | -0.594760105 | 0.0010463  | 0.006622599 |
| ENSG00000183690 | EFHC2       | -1.097365503 | 2.83E-14   | 6.47E-12    |
| ENSG00000129521 | EGLN3       | 0.667462573  | 1.22E-06   | 2.50E-05    |
| ENSG00000120738 | EGR1        | 1.195874064  | 1.88E-05   | 0.000249254 |
| ENSG00000122877 | EGR2        | 1.040672131  | 0.00028572 | 0.002321329 |
| ENSG00000179388 | EGR3        | 0.915563532  | 0.00162539 | 0.009443546 |
| ENSG00000161960 | EIF4A1      | 0.69987149   | 1.60E-06   | 3.11E-05    |
| ENSG00000187840 | EIF4EBP1    | -1.005972874 | 2.69E-13   | 4.37E-11    |
| ENSG00000170571 | EMB         | -0.625922733 | 0.00116182 | 0.007191454 |
| ENSG00000164035 | EMCN        | -0.74392439  | 3.22E-11   | 3.04E-09    |
| ENSG00000125746 | EML2        | 0.653412733  | 1.06E-09   | 6.01E-08    |



|                 |            |              |            |             |
|-----------------|------------|--------------|------------|-------------|
| ENSG00000214595 | EML6       | 0.615808865  | 0.00019045 | 0.001669889 |
| ENSG00000167280 | ENGASE     | 0.634625666  | 1.45E-07   | 4.05E-06    |
| ENSG00000197594 | ENPP1      | -0.778623483 | 1.25E-08   | 4.99E-07    |
| ENSG00000095203 | EPB41L4B   | -0.812154372 | 1.20E-05   | 0.000170947 |
| ENSG00000142627 | EPHA2      | 0.619489965  | 1.37E-07   | 3.88E-06    |
| ENSG00000106123 | EPHB6      | -0.759191543 | 2.09E-06   | 3.91E-05    |
| ENSG00000049283 | EPN3       | -0.742544511 | 0.00044946 | 0.003365162 |
| ENSG00000065361 | ERBB3      | -0.866943037 | 0.00065853 | 0.004557165 |
| ENSG00000187672 | ERC2       | 0.600966295  | 0.00385111 | 0.018786358 |
| ENSG00000226887 | ERVMER34-1 | -0.613108042 | 0.00122655 | 0.007536722 |
| ENSG00000164283 | ESM1       | 0.74553433   | 0.0065553  | 0.0284421   |
| ENSG00000205707 | ETFRF1     | -0.699416265 | 5.07E-11   | 4.38E-09    |
| ENSG00000143845 | ETNK2      | -1.179850147 | 4.42E-11   | 3.95E-09    |
| ENSG00000175832 | ETV4       | 1.005299888  | 0.00035524 | 0.002771494 |
| ENSG00000244405 | ETV5       | 0.635439334  | 0.00032241 | 0.002562829 |
| ENSG00000072840 | EVC        | 0.600193309  | 6.27E-05   | 0.000666276 |
| ENSG00000185862 | EVI2B      | -0.867053033 | 0.00060418 | 0.004245815 |
| ENSG00000196405 | EVL        | 0.839952714  | 6.77E-19   | 4.84E-16    |
| ENSG00000179044 | EXOC3L1    | 0.669636671  | 0.00061905 | 0.0043258   |
| ENSG00000110723 | EXPH5      | -1.058032198 | 0.00025702 | 0.002131486 |
| ENSG00000182197 | EXT1       | 0.79123254   | 9.65E-16   | 3.34E-13    |
| ENSG00000158008 | EXTL1      | 1.138004391  | 1.23E-07   | 3.57E-06    |
| ENSG00000124491 | F13A1      | -1.082686647 | 2.48E-05   | 0.00031163  |
| ENSG00000181104 | F2R        | 0.917920242  | 7.77E-07   | 1.71E-05    |
| ENSG00000164220 | F2RL2      | 0.927269277  | 0.00100215 | 0.006404891 |
| ENSG00000127533 | F2RL3      | 0.751435417  | 0.01131839 | 0.043803962 |
| ENSG00000198734 | F5         | -1.330176916 | 7.54E-05   | 0.000777362 |
| ENSG00000185010 | F8         | -1.091094777 | 6.51E-12   | 7.71E-10    |
| ENSG00000170323 | FABP4      | -0.940184108 | 7.85E-07   | 1.73E-05    |
| ENSG00000164687 | FABP5      | -0.844220471 | 0.00055709 | 0.003994693 |
| ENSG00000167106 | FAM102A    | 0.596580797  | 6.32E-07   | 1.42E-05    |
| ENSG00000203950 | FAM127B    | -0.594688688 | 0.00037605 | 0.002905986 |
| ENSG00000158863 | FAM160B2   | 0.673477105  | 2.47E-12   | 3.13E-10    |
| ENSG00000122378 | FAM213A    | -0.648514941 | 9.49E-12   | 1.09E-09    |
| ENSG00000099290 | FAM21A     | -0.6090001   | 3.17E-10   | 2.11E-08    |
| ENSG00000184949 | FAM227A    | 0.671066866  | 2.56E-05   | 0.000318147 |
| ENSG00000158246 | FAM46B     | -0.664720573 | 0.00493352 | 0.022758298 |
| ENSG00000183508 | FAM46C     | -0.625604369 | 1.51E-06   | 2.96E-05    |
| ENSG00000262919 | FAM58A     | -0.751571386 | 1.11E-09   | 6.22E-08    |
| ENSG00000111913 | FAM65B     | 0.590183505  | 0.00156325 | 0.00915697  |
| ENSG00000042062 | FAM65C     | -0.645567137 | 0.00065329 | 0.004526159 |
| ENSG00000187773 | FAM69C     | 0.732668404  | 0.00064408 | 0.004474204 |
| ENSG00000157470 | FAM81A     | -1.028896331 | 5.22E-08   | 1.71E-06    |

|                 |            |              |            |             |
|-----------------|------------|--------------|------------|-------------|
| ENSG00000133477 | FAM83F     | -0.785763467 | 0.0007383  | 0.004989092 |
| ENSG00000162981 | FAM84A     | -0.976950058 | 0.00025004 | 0.002083835 |
| ENSG00000078098 | FAP        | 1.315084443  | 3.69E-08   | 1.26E-06    |
| ENSG00000152767 | FARP1      | 0.687436128  | 4.77E-07   | 1.12E-05    |
| ENSG00000165323 | FAT3       | 1.209270626  | 2.56E-05   | 0.000318147 |
| ENSG00000188878 | FBF1       | 0.797798384  | 9.69E-07   | 2.05E-05    |
| ENSG00000155034 | FBXL18     | 0.866236775  | 2.32E-09   | 1.20E-07    |
| ENSG00000099364 | FBXL19     | 0.670459871  | 1.47E-06   | 2.90E-05    |
| ENSG00000135722 | FBXL8      | 0.680047489  | 0.00026539 | 0.002182484 |
| ENSG00000158869 | FCER1G     | -1.071459481 | 8.67E-06   | 0.000130123 |
| ENSG00000275395 | FCGBP      | -1.668758345 | 2.91E-07   | 7.30E-06    |
| ENSG00000244682 | FCGR2C     | -0.634660526 | 0.00560282 | 0.02515668  |
| ENSG00000203747 | FCGR3A     | -1.194304588 | 2.13E-05   | 0.000274018 |
| ENSG00000142748 | FCN3       | -2.073364404 | 4.55E-14   | 9.67E-12    |
| ENSG00000114279 | FGF12      | -0.625473625 | 0.00076388 | 0.005119359 |
| ENSG00000243319 | FGF14-IT1  | 0.792354974  | 0.00217582 | 0.011872089 |
| ENSG00000140285 | FGF7       | -1.238393795 | 1.07E-13   | 2.03E-11    |
| ENSG00000096060 | FKBP5      | -0.982875587 | 1.50E-06   | 2.95E-05    |
| ENSG00000037280 | FLT4       | 0.882763322  | 3.44E-11   | 3.13E-09    |
| ENSG00000059122 | FLYWCH1    | 0.626834904  | 9.73E-07   | 2.06E-05    |
| ENSG00000248905 | FMN1       | -0.735948883 | 4.20E-06   | 7.10E-05    |
| ENSG00000131781 | FMO5       | -0.657405472 | 3.81E-05   | 0.000443009 |
| ENSG00000122176 | FMOD       | 1.447890496  | 2.47E-08   | 9.07E-07    |
| ENSG00000164694 | FNDC1      | 1.466434132  | 5.09E-09   | 2.33E-07    |
| ENSG00000170345 | FOS        | 0.920106756  | 0.00115625 | 0.007162584 |
| ENSG00000125740 | FOSB       | 1.041860225  | 1.92E-07   | 5.15E-06    |
| ENSG00000164916 | FOXK1      | 0.685975457  | 4.29E-09   | 2.02E-07    |
| ENSG00000179772 | FOXS1      | 0.657412602  | 0.00595828 | 0.026410695 |
| ENSG00000277737 | FP325317.1 | -0.804668435 | 0.00520403 | 0.02374139  |
| ENSG00000164946 | FREM1      | 0.711400094  | 8.61E-07   | 1.87E-05    |
| ENSG00000126391 | FRMD8      | 0.656711967  | 5.72E-08   | 1.85E-06    |
| ENSG00000162998 | FRZB       | 1.566907433  | 1.35E-10   | 9.94E-09    |
| ENSG00000075618 | FSCN1      | 0.875029973  | 5.50E-06   | 8.93E-05    |
| ENSG00000186628 | FSD2       | -0.59445681  | 0.00043321 | 0.003257984 |
| ENSG00000165775 | FUNDC2     | -0.664588355 | 1.11E-13   | 2.10E-11    |
| ENSG00000180340 | FZD2       | 0.634608705  | 0.00685034 | 0.029419038 |
| ENSG00000155760 | FZD7       | 0.601131124  | 2.13E-05   | 0.000274018 |
| ENSG00000177283 | FZD8       | 0.771122904  | 8.54E-05   | 0.000861523 |
| ENSG00000105325 | FZR1       | 0.68506968   | 3.79E-11   | 3.42E-09    |
| ENSG00000123689 | GOS2       | -0.888927942 | 1.51E-06   | 2.96E-05    |
| ENSG00000163288 | GABRB1     | 0.65740309   | 5.15E-05   | 0.000567131 |
| ENSG00000131386 | GALNT15    | -1.202993558 | 9.00E-06   | 0.000134074 |
| ENSG00000110328 | GALNT18    | 0.627179202  | 1.09E-07   | 3.21E-06    |

|                 |             |              |            |             |
|-----------------|-------------|--------------|------------|-------------|
| ENSG00000172020 | GAP43       | 1.356446532  | 4.62E-07   | 1.09E-05    |
| ENSG00000136895 | GARNL3      | 0.607898213  | 2.20E-07   | 5.78E-06    |
| ENSG00000183087 | GAS6        | 0.618928271  | 5.73E-08   | 1.85E-06    |
| ENSG00000171766 | GATM        | 0.721270349  | 0.00304469 | 0.015615531 |
| ENSG00000156466 | GDF6        | 1.535879473  | 1.11E-07   | 3.27E-06    |
| ENSG00000143869 | GDF7        | 1.134487131  | 1.53E-06   | 2.99E-05    |
| ENSG00000158555 | GDPD5       | 0.738544078  | 0.00024329 | 0.002039146 |
| ENSG00000239857 | GET4        | 0.885417891  | 1.42E-05   | 0.000198413 |
| ENSG00000151892 | GFRA1       | -1.263482534 | 4.90E-09   | 2.28E-07    |
| ENSG00000121743 | GJA3        | 0.618380968  | 2.48E-08   | 9.09E-07    |
| ENSG00000074047 | GLI2        | 0.634294688  | 0.00539927 | 0.024452275 |
| ENSG00000139278 | GLIPR1      | -0.65424704  | 0.00131605 | 0.007988789 |
| ENSG00000111664 | GNB3        | 0.732826825  | 4.18E-05   | 0.000480042 |
| ENSG00000135052 | GOLM1       | 0.65940487   | 6.15E-06   | 9.78E-05    |
| ENSG00000063660 | GPC1        | 0.660482241  | 1.59E-07   | 4.38E-06    |
| ENSG00000125772 | GPCPD1      | 0.731045064  | 9.18E-17   | 4.01E-14    |
| ENSG00000152642 | GPD1L       | -0.843999962 | 5.10E-12   | 6.20E-10    |
| ENSG00000277494 | GPIHBP1     | -0.948687229 | 1.25E-05   | 0.000177703 |
| ENSG00000046653 | GPM6B       | -0.95406331  | 0.00010744 | 0.001032629 |
| ENSG00000184194 | GPR173      | 0.79567903   | 4.93E-05   | 0.000546911 |
| ENSG00000166073 | GPR176      | 0.807680925  | 3.80E-05   | 0.000441841 |
| ENSG00000170837 | GPR27       | 1.272907742  | 4.75E-15   | 1.37E-12    |
| ENSG00000119714 | GPR68       | 1.157191014  | 4.28E-05   | 0.00048815  |
| ENSG00000164604 | GPR85       | 0.799786545  | 0.00100982 | 0.006443095 |
| ENSG00000121957 | GPSM2       | -1.034698136 | 7.35E-09   | 3.17E-07    |
| ENSG00000211445 | GPX3        | -1.219548731 | 2.00E-15   | 6.03E-13    |
| ENSG00000178075 | GRAMD1C     | -0.857469297 | 1.26E-05   | 0.000178793 |
| ENSG00000115290 | GRB14       | -1.100333227 | 8.85E-08   | 2.66E-06    |
| ENSG00000125675 | GRIA3       | 0.784732708  | 0.00457856 | 0.021439676 |
| ENSG00000164418 | GRIK2       | -0.979262223 | 0.00022054 | 0.001885531 |
| ENSG00000163873 | GRIK3       | -1.114388148 | 5.40E-05   | 0.00058979  |
| ENSG00000183454 | GRIN2A      | -1.108265712 | 3.13E-05   | 0.000375173 |
| ENSG00000204928 | GRXCR2      | -3.26484638  | 1.37E-28   | 5.39E-25    |
| ENSG00000230189 | GS1-124K5.2 | 0.669554704  | 1.93E-05   | 0.000253511 |
| ENSG00000073605 | GSDMB       | 0.674359364  | 4.45E-08   | 1.49E-06    |
| ENSG00000168765 | GSTM4       | -0.746553704 | 4.23E-16   | 1.61E-13    |
| ENSG00000122034 | GTF3A       | -0.621150486 | 3.84E-13   | 5.92E-11    |
| ENSG00000152402 | GUCY1A2     | -0.628794751 | 3.35E-07   | 8.23E-06    |
| ENSG00000189060 | H1F0        | -0.648093533 | 4.45E-08   | 1.49E-06    |
| ENSG00000206417 | H1FX-AS1    | 0.680315181  | 0.00032764 | 0.002592213 |
| ENSG00000246705 | H2AFJ       | -0.599809653 | 3.27E-08   | 1.15E-06    |
| ENSG00000162882 | HA AO       | 0.856340867  | 5.20E-06   | 8.51E-05    |
| ENSG00000084754 | HADHA       | -0.697370417 | 1.35E-10   | 9.95E-09    |

|                 |           |              |            |             |
|-----------------|-----------|--------------|------------|-------------|
| ENSG00000138029 | HADHB     | -0.809301777 | 7.84E-10   | 4.64E-08    |
| ENSG00000145681 | HAPLN1    | 0.981845735  | 0.00014407 | 0.001323744 |
| ENSG00000140511 | HAPLN3    | 0.651638451  | 0.00143355 | 0.008539357 |
| ENSG00000170961 | HAS2      | -0.72585878  | 0.00203585 | 0.011278017 |
| ENSG00000206172 | HBA1      | 0.779167753  | 0.00785009 | 0.032775186 |
| ENSG00000188536 | HBA2      | 0.900102145  | 0.00186895 | 0.010556861 |
| ENSG00000244734 | HBB       | 1.112846967  | 8.40E-05   | 0.000850111 |
| ENSG00000103145 | HCFC1R1   | -0.712435695 | 1.07E-09   | 6.08E-08    |
| ENSG00000099822 | HCN2      | 0.792646033  | 0.00172566 | 0.00990888  |
| ENSG00000173706 | HEG1      | 0.613517372  | 2.76E-13   | 4.46E-11    |
| ENSG00000130589 | HELZ2     | 0.762692365  | 6.67E-06   | 0.000104705 |
| ENSG00000276550 | HERC2P2   | -0.719299332 | 9.53E-05   | 0.00093883  |
| ENSG00000180229 | HERC2P3   | -0.758132266 | 0.01201757 | 0.045803143 |
| ENSG00000188290 | HES4      | 1.233264318  | 7.39E-08   | 2.30E-06    |
| ENSG00000182218 | HHIPL1    | 0.722412543  | 4.26E-06   | 7.19E-05    |
| ENSG00000167861 | HID1      | 0.625783428  | 1.08E-08   | 4.40E-07    |
| ENSG00000124440 | HIF3A     | -0.677015488 | 0.00075669 | 0.005081325 |
| ENSG00000184357 | HIST1H1B  | -1.212194524 | 6.14E-05   | 0.000656198 |
| ENSG00000187837 | HIST1H1C  | -0.830664777 | 3.35E-11   | 3.09E-09    |
| ENSG00000124575 | HIST1H1D  | -1.257550271 | 1.57E-07   | 4.33E-06    |
| ENSG00000168298 | HIST1H1E  | -0.981512161 | 2.16E-14   | 5.03E-12    |
| ENSG00000158373 | HIST1H2BD | -0.622834812 | 8.83E-08   | 2.66E-06    |
| ENSG00000277224 | HIST1H2BF | -0.860668915 | 3.62E-06   | 6.27E-05    |
| ENSG00000124635 | HIST1H2BJ | -0.598602012 | 0.00085013 | 0.005589384 |
| ENSG00000274267 | HIST1H3B  | -0.821979286 | 0.01222145 | 0.046313136 |
| ENSG00000204632 | HLA-G     | 1.034423022  | 1.23E-05   | 0.000174858 |
| ENSG00000148357 | HMCN2     | 1.450668795  | 1.58E-12   | 2.16E-10    |
| ENSG00000134240 | HMGCS2    | -2.317701031 | 3.74E-09   | 1.80E-07    |
| ENSG00000100292 | HMOX1     | -0.741849669 | 0.0043673  | 0.020746952 |
| ENSG00000103415 | HMOX2     | -0.804472361 | 8.77E-18   | 4.81E-15    |
| ENSG00000241935 | HOGA1     | -1.029098038 | 2.12E-08   | 7.94E-07    |
| ENSG00000134709 | HOOK1     | -1.049884492 | 5.67E-06   | 9.16E-05    |
| ENSG00000168453 | HR        | 0.947221175  | 7.01E-05   | 0.000732133 |
| ENSG00000234520 | HRAT17    | -0.741020132 | 6.34E-05   | 0.000673034 |
| ENSG00000135116 | HRK       | 0.697622144  | 0.01298341 | 0.04850416  |
| ENSG00000002587 | HS3ST1    | -0.962929652 | 2.57E-07   | 6.60E-06    |
| ENSG00000198189 | HSD17B11  | -0.613442421 | 4.87E-07   | 1.15E-05    |
| ENSG00000119471 | HSDL2     | -0.644617161 | 7.54E-09   | 3.24E-07    |
| ENSG00000205940 | HSP90AB2P | 0.725719473  | 0.00707422 | 0.03016619  |
| ENSG00000126803 | HSPA2     | 0.817849104  | 0.00014073 | 0.001297076 |
| ENSG00000164070 | HSPA4L    | 0.677427431  | 7.50E-10   | 4.48E-08    |
| ENSG00000169271 | HSPB3     | -0.770703114 | 4.69E-08   | 1.56E-06    |
| ENSG00000164270 | HTR4      | 0.623199841  | 0.01218308 | 0.046233813 |

|                 |              |              |            |             |
|-----------------|--------------|--------------|------------|-------------|
| ENSG00000166033 | HTRA1        | 1.062470722  | 2.37E-27   | 5.58E-24    |
| ENSG00000181873 | IBA57        | 0.772293006  | 2.35E-11   | 2.33E-09    |
| ENSG00000172201 | ID4          | 0.879752592  | 0.0014663  | 0.008697108 |
| ENSG00000127415 | IDUA         | 0.665647872  | 7.43E-05   | 0.000767518 |
| ENSG00000160888 | IER2         | 1.293881922  | 4.37E-12   | 5.34E-10    |
| ENSG00000188483 | IER5L        | 0.716231912  | 0.00067528 | 0.004649839 |
| ENSG00000169991 | IFFO2        | 0.670837129  | 4.11E-08   | 1.39E-06    |
| ENSG00000185201 | IFITM2       | -0.709653499 | 5.03E-05   | 0.00055713  |
| ENSG00000142089 | IFITM3       | -0.620193912 | 3.34E-06   | 5.83E-05    |
| ENSG00000140443 | IGF1R        | 0.592778705  | 4.34E-10   | 2.80E-08    |
| ENSG00000115457 | IGFBP2       | 1.070702524  | 3.14E-06   | 5.53E-05    |
| ENSG00000144847 | IGSF11       | -0.595689365 | 0.00051525 | 0.00374522  |
| ENSG00000134470 | IL15RA       | -0.782650426 | 2.35E-07   | 6.14E-06    |
| ENSG00000172458 | IL17D        | 1.429553803  | 3.01E-08   | 1.07E-06    |
| ENSG00000115604 | IL18R1       | -0.951943577 | 1.85E-07   | 4.97E-06    |
| ENSG00000115602 | IL1RL1       | -1.446889614 | 1.24E-07   | 3.59E-06    |
| ENSG0000016402  | IL20RA       | -1.064207133 | 4.62E-05   | 0.000519447 |
| ENSG00000143195 | ILDR2        | 0.860551333  | 1.32E-08   | 5.25E-07    |
| ENSG00000141401 | IMPA2        | -0.633025782 | 4.62E-07   | 1.09E-05    |
| ENSG00000257704 | INAFM1       | 1.032267148  | 3.23E-07   | 7.99E-06    |
| ENSG00000163083 | INHBB        | 0.938638121  | 0.00099115 | 0.006350123 |
| ENSG00000164880 | INTS1        | 0.633827371  | 7.47E-08   | 2.31E-06    |
| ENSG00000120645 | IQSEC3       | 0.885041654  | 0.00015116 | 0.001379184 |
| ENSG00000128604 | IRF5         | -0.618205563 | 0.00282772 | 0.014746558 |
| ENSG00000167378 | IRGQ         | 0.626360994  | 2.88E-16   | 1.11E-13    |
| ENSG00000129009 | ISLR         | 0.79349912   | 3.69E-06   | 6.39E-05    |
| ENSG00000164171 | ITGA2        | -0.904878981 | 7.62E-05   | 0.000783637 |
| ENSG00000169896 | ITGAM        | -0.684956087 | 0.00171258 | 0.009845746 |
| ENSG00000140678 | ITGAX        | 1.062173744  | 2.26E-05   | 0.000288448 |
| ENSG00000115221 | ITGB6        | -0.593802758 | 0.00029129 | 0.0023592   |
| ENSG00000198542 | ITGBL1       | 1.212317866  | 9.25E-06   | 0.000137009 |
| ENSG00000148841 | ITPRIP       | 0.706635252  | 3.63E-05   | 0.000426282 |
| ENSG00000162434 | JAK1         | -0.621845952 | 5.55E-20   | 5.45E-17    |
| ENSG00000168970 | JMJD7-PLA2G4 | 0.609536312  | 1.06E-05   | 0.000153181 |
| ENSG00000177606 | JUN          | 0.639228466  | 1.18E-06   | 2.42E-05    |
| ENSG00000171223 | JUNB         | 0.688776642  | 0.00643106 | 0.028047545 |
| ENSG00000114166 | KAT2B        | -0.613022381 | 8.42E-16   | 2.96E-13    |
| ENSG00000107821 | KAZALD1      | 0.692633011  | 7.22E-05   | 0.000751204 |
| ENSG00000163376 | KBTBD8       | 1.001166963  | 1.62E-07   | 4.44E-06    |
| ENSG00000130037 | KCNA5        | 0.727041661  | 0.00095806 | 0.006171604 |
| ENSG00000168135 | KCNJ4        | 1.252675751  | 1.14E-14   | 2.89E-12    |
| ENSG00000099337 | KCNK6        | 0.763768537  | 0.00016051 | 0.001448871 |
| ENSG00000156113 | KCNMA1       | 0.673861466  | 0.00748395 | 0.031593387 |

|                 |               |              |            |             |
|-----------------|---------------|--------------|------------|-------------|
| ENSG00000197584 | KCNMB2        | 0.684091536  | 0.00068878 | 0.004733159 |
| ENSG00000143603 | KCNN3         | 0.670028637  | 5.60E-06   | 9.05E-05    |
| ENSG00000117013 | KCNQ4         | 1.243692744  | 2.46E-08   | 9.04E-07    |
| ENSG00000178695 | KCTD12        | -0.637561336 | 8.70E-10   | 5.08E-08    |
| ENSG00000128052 | KDR           | -0.646589221 | 2.85E-07   | 7.21E-06    |
| ENSG00000235750 | KIAA0040      | -0.731684573 | 1.11E-11   | 1.25E-09    |
| ENSG00000047578 | KIAA0556      | 0.839527999  | 2.62E-19   | 2.21E-16    |
| ENSG00000109265 | KIAA1211      | 1.665641885  | 4.20E-09   | 1.98E-07    |
| ENSG00000250305 | KIAA1456      | -0.707815213 | 2.84E-08   | 1.03E-06    |
| ENSG00000149633 | KIAA1755      | 0.943064781  | 1.22E-06   | 2.50E-05    |
| ENSG00000130294 | KIF1A         | 1.357057384  | 4.97E-07   | 1.16E-05    |
| ENSG00000116852 | KIF21B        | 1.150174479  | 1.68E-07   | 4.56E-06    |
| ENSG00000166813 | KIF7          | 1.289144852  | 9.79E-16   | 3.34E-13    |
| ENSG00000162755 | KLHDC9        | 0.609723908  | 0.00047056 | 0.003482242 |
| ENSG00000213160 | KLHL23        | -0.59661612  | 4.30E-13   | 6.49E-11    |
| ENSG00000119771 | KLHL29        | 0.765927458  | 5.66E-05   | 0.000614238 |
| ENSG00000185915 | KLHL34        | 0.858850722  | 4.66E-06   | 7.78E-05    |
| ENSG00000239474 | KLHL41        | -0.903208559 | 1.08E-12   | 1.52E-10    |
| ENSG00000133247 | KMT5C         | 0.711312526  | 1.40E-06   | 2.78E-05    |
| ENSG00000133619 | KRBA1         | 1.023314148  | 7.20E-10   | 4.34E-08    |
| ENSG00000198910 | L1CAM         | -0.816678791 | 0.00172363 | 0.009899655 |
| ENSG00000262312 | LA16c-390H2.4 | 0.68974926   | 0.00026994 | 0.002212945 |
| ENSG00000147592 | LACTB2        | -0.646464814 | 1.61E-07   | 4.41E-06    |
| ENSG00000159166 | LAD1          | -1.924818605 | 2.11E-12   | 2.75E-10    |
| ENSG00000196878 | LAMB3         | -0.6568675   | 0.00024543 | 0.002052716 |
| ENSG00000162511 | LAPTM5        | -0.939809628 | 7.25E-06   | 0.000112256 |
| ENSG00000162194 | LBHD1         | 0.684632847  | 1.55E-05   | 0.000212011 |
| ENSG00000213398 | LCAT          | 0.641610969  | 1.08E-09   | 6.11E-08    |
| ENSG00000184925 | LCN12         | 1.625319454  | 2.96E-11   | 2.85E-09    |
| ENSG00000267206 | LCN6          | -1.757013918 | 1.04E-10   | 8.01E-09    |
| ENSG00000136167 | LCP1          | -0.62937573  | 0.00672291 | 0.02902274  |
| ENSG00000167615 | LENG8         | 0.633788813  | 1.15E-07   | 3.36E-06    |
| ENSG00000106003 | LFNG          | 0.885073963  | 2.16E-05   | 0.00027739  |
| ENSG00000186818 | LILRB4        | -0.646114084 | 0.00553473 | 0.024912631 |
| ENSG00000136490 | LIMD2         | 0.638190614  | 0.00200234 | 0.011139505 |
| ENSG00000179406 | LINC00174     | 0.823267911  | 1.97E-07   | 5.28E-06    |
| ENSG00000223768 | LINC00205     | 0.881310374  | 1.23E-05   | 0.000175287 |
| ENSG00000232977 | LINC00327     | 0.646566093  | 0.00051531 | 0.00374522  |
| ENSG00000229246 | LINC00377     | 1.441352172  | 6.76E-08   | 2.14E-06    |
| ENSG00000237945 | LINC00649     | -0.622960709 | 0.00094238 | 0.006092286 |
| ENSG00000179136 | LINC00670     | 0.865826185  | 6.45E-05   | 0.000683157 |
| ENSG00000237949 | LINC00844     | -0.855027635 | 0.00084871 | 0.005581612 |
| ENSG00000251209 | LINC00923     | -0.679576761 | 0.00020397 | 0.001769983 |



|                 |           |              |            |             |
|-----------------|-----------|--------------|------------|-------------|
| ENSG00000281205 | LINC00950 | 0.88106052   | 8.00E-09   | 3.41E-07    |
| ENSG00000203999 | LINC01270 | 1.015985865  | 2.40E-05   | 0.000303163 |
| ENSG00000246223 | LINC01550 | -0.99144351  | 3.72E-08   | 1.27E-06    |
| ENSG00000079435 | LIPE      | 0.651466878  | 9.41E-05   | 0.000930652 |
| ENSG00000163898 | LIPH      | 0.89759043   | 0.00021601 | 0.001855963 |
| ENSG00000139636 | LMBR1L    | 0.692291181  | 2.39E-14   | 5.52E-12    |
| ENSG00000167210 | LOXHD1    | 1.133877859  | 5.26E-07   | 1.21E-05    |
| ENSG00000129038 | LOXL1     | 0.909437702  | 9.43E-06   | 0.000139357 |
| ENSG00000134013 | LOXL2     | 0.732048469  | 0.00060495 | 0.004248692 |
| ENSG00000198121 | LPAR1     | -0.599046783 | 3.84E-05   | 0.000445155 |
| ENSG00000171517 | LPAR3     | -0.735398165 | 0.00029254 | 0.002366309 |
| ENSG00000087253 | LPCAT2    | -0.600492076 | 2.93E-08   | 1.05E-06    |
| ENSG00000111684 | LPCAT3    | -0.642273032 | 8.78E-07   | 1.89E-05    |
| ENSG00000176454 | LPCAT4    | -0.757943898 | 1.36E-10   | 9.95E-09    |
| ENSG00000130881 | LRP3      | 0.710729137  | 1.10E-06   | 2.29E-05    |
| ENSG00000162337 | LRP5      | 0.643652337  | 3.21E-13   | 5.05E-11    |
| ENSG00000100068 | LRP5L     | 0.61381752   | 1.83E-05   | 0.000243541 |
| ENSG00000137269 | LRRC1     | 0.803964942  | 8.09E-10   | 4.78E-08    |
| ENSG00000185028 | LRRC14B   | -0.595506261 | 0.00769875 | 0.032269067 |
| ENSG00000128606 | LRRC17    | 0.610541283  | 0.00267253 | 0.014077355 |
| ENSG00000122477 | LRRC39    | -0.627136292 | 5.85E-07   | 1.33E-05    |
| ENSG00000129295 | LRRC6     | 0.670777184  | 0.00160458 | 0.009341021 |
| ENSG00000173114 | LRRN3     | -2.210034436 | 5.03E-19   | 3.83E-16    |
| ENSG00000185565 | LSAMP     | -1.224106498 | 5.89E-07   | 1.33E-05    |
| ENSG00000119681 | LTBP2     | 1.282801789  | 4.01E-08   | 1.36E-06    |
| ENSG00000168056 | LTBP3     | 0.853293379  | 6.94E-07   | 1.54E-05    |
| ENSG00000090006 | LTBP4     | 0.794264442  | 8.03E-05   | 0.000819714 |
| ENSG00000139329 | LUM       | 1.170964393  | 2.66E-10   | 1.81E-08    |
| ENSG00000133800 | LYVE1     | -1.590639876 | 3.67E-09   | 1.78E-07    |
| ENSG00000088899 | LZTS3     | -0.636413594 | 3.45E-10   | 2.27E-08    |
| ENSG00000198517 | MAFK      | 1.109171278  | 2.04E-16   | 8.44E-14    |
| ENSG00000204740 | MALRD1    | 0.655074008  | 0.01048567 | 0.041219843 |
| ENSG00000140400 | MAN2C1    | 0.593796543  | 1.49E-08   | 5.81E-07    |
| ENSG00000172469 | MANEA     | -0.840890733 | 1.37E-18   | 8.27E-16    |
| ENSG00000261366 | MANEA-AS1 | -0.937646272 | 2.33E-08   | 8.64E-07    |
| ENSG00000034152 | MAP2K3    | 0.707308155  | 7.26E-05   | 0.000753349 |
| ENSG00000156265 | MAP3K7CL  | 1.047517433  | 3.82E-05   | 0.000443087 |
| ENSG00000047849 | MAP4      | 0.592613106  | 4.94E-06   | 8.16E-05    |
| ENSG00000171533 | MAP6      | 0.652866854  | 4.11E-09   | 1.95E-07    |
| ENSG00000141639 | MAPK4     | 0.66890655   | 0.00055307 | 0.003968268 |
| ENSG00000121653 | MAPK8IP1  | 0.660913313  | 9.10E-07   | 1.95E-05    |
| ENSG00000138834 | MAPK8IP3  | 0.678511128  | 1.61E-13   | 2.82E-11    |
| ENSG00000186868 | MAPT      | 0.802608489  | 5.68E-05   | 0.000615519 |

|                 |            |              |            |             |
|-----------------|------------|--------------|------------|-------------|
| ENSG00000019169 | MARCO      | -1.00576422  | 0.00345965 | 0.017233936 |
| ENSG00000099308 | MAST3      | 0.599496282  | 1.92E-05   | 0.000253209 |
| ENSG00000143797 | MBOAT2     | 0.742803987  | 2.68E-07   | 6.86E-06    |
| ENSG00000076706 | MCAM       | 0.842842916  | 4.02E-13   | 6.12E-11    |
| ENSG00000053524 | MCF2L2     | 0.778965047  | 9.55E-05   | 0.000940552 |
| ENSG00000215424 | MCM3AP-AS1 | -0.981690291 | 6.08E-09   | 2.71E-07    |
| ENSG00000140563 | MCTP2      | -1.139343008 | 1.06E-06   | 2.23E-05    |
| ENSG00000110492 | MDK        | 0.802406296  | 0.00041551 | 0.003143923 |
| ENSG00000144893 | MED12L     | 1.470524385  | 1.36E-11   | 1.49E-09    |
| ENSG00000214548 | MEG3       | 0.813231975  | 2.06E-08   | 7.76E-07    |
| ENSG00000105429 | MEGF8      | 0.611274208  | 3.97E-07   | 9.61E-06    |
| ENSG00000164024 | METAP1     | -0.719525916 | 1.31E-18   | 8.12E-16    |
| ENSG00000250878 | METTL21EP  | 0.669505128  | 0.00105087 | 0.006644235 |
| ENSG00000170439 | METTL7B    | -0.827467133 | 0.00085584 | 0.005619097 |
| ENSG00000128268 | MGAT3      | 0.615251019  | 0.00205017 | 0.011341712 |
| ENSG00000182050 | MGAT4C     | -0.641546202 | 0.00146516 | 0.008692496 |
| ENSG00000008394 | MGST1      | -1.28090266  | 2.68E-06   | 4.82E-05    |
| ENSG00000133816 | MICAL2     | 0.709994355  | 1.92E-09   | 1.02E-07    |
| ENSG00000164877 | MICALL2    | 0.792692986  | 1.65E-05   | 0.000224363 |
| ENSG00000141741 | MIEN1      | -0.79032632  | 2.53E-13   | 4.14E-11    |
| ENSG00000265142 | MIR133A1HG | -0.750193733 | 2.66E-05   | 0.000327764 |
| ENSG00000267519 | MIR24-2    | 0.890985802  | 2.87E-05   | 0.000349763 |
| ENSG00000228526 | MIR34A     | 0.736804545  | 5.51E-05   | 0.000599249 |
| ENSG00000267532 | MIR497HG   | 0.646723835  | 8.92E-06   | 0.000133175 |
| ENSG00000148773 | MKI67      | -0.961334091 | 0.0026319  | 0.01390685  |
| ENSG00000178053 | MLF1       | -0.629038578 | 2.73E-05   | 0.000335328 |
| ENSG00000089693 | MLF2       | -0.590915605 | 1.24E-12   | 1.73E-10    |
| ENSG00000196549 | MME        | 1.373462067  | 6.43E-12   | 7.66E-10    |
| ENSG00000164172 | MOCS2      | -0.700626658 | 2.03E-13   | 3.44E-11    |
| ENSG00000204655 | MOG        | -1.754871587 | 3.03E-08   | 1.08E-06    |
| ENSG00000171160 | MORN4      | 0.609623847  | 2.57E-06   | 4.65E-05    |
| ENSG00000079931 | MOXD1      | 0.934221069  | 4.11E-06   | 6.97E-05    |
| ENSG00000197629 | MPEG1      | -0.67077183  | 0.00090486 | 0.005891699 |
| ENSG00000158887 | MPZ        | -1.058922737 | 2.16E-08   | 8.10E-07    |
| ENSG00000260314 | MRC1       | -1.006862943 | 7.69E-06   | 0.000117848 |
| ENSG00000011028 | MRC2       | 0.662078783  | 5.20E-05   | 0.000571612 |
| ENSG00000175581 | MRPL48     | -0.593049075 | 1.12E-10   | 8.57E-09    |
| ENSG00000243927 | MRPS6      | -0.703742069 | 1.46E-12   | 2.01E-10    |
| ENSG00000110079 | MS4A4A     | -0.745858252 | 0.00201022 | 0.011170177 |
| ENSG00000110077 | MS4A6A     | -0.828754607 | 0.00015176 | 0.001382852 |
| ENSG00000057468 | MSH4       | 0.782175669  | 8.44E-05   | 0.00085363  |
| ENSG00000135097 | MSI1       | 0.841345196  | 4.71E-05   | 0.00052683  |
| ENSG00000166343 | MSS51      | 1.218478574  | 1.32E-10   | 9.75E-09    |



|                 |          |              |            |             |
|-----------------|----------|--------------|------------|-------------|
| ENSG00000164078 | MST1R    | 0.602800903  | 0.00364056 | 0.017971812 |
| ENSG00000187193 | MT1X     | -1.025969421 | 3.75E-05   | 0.000437336 |
| ENSG00000248527 | MTATP6P1 | -0.866572739 | 0.00523112 | 0.023837303 |
| ENSG00000168502 | MTCL1    | 0.606732885  | 0.00104223 | 0.006603766 |
| ENSG00000198712 | MT-CO2   | -0.730862034 | 0.00912255 | 0.036917678 |
| ENSG00000198727 | MT-CYB   | -0.824627475 | 0.00836344 | 0.034454812 |
| ENSG00000120254 | MTHFD1L  | 0.863402423  | 8.52E-05   | 0.000860572 |
| ENSG00000122033 | MTIF3    | -0.73263858  | 9.41E-15   | 2.49E-12    |
| ENSG00000198888 | MT-ND1   | -0.851777889 | 0.01090944 | 0.042535467 |
| ENSG00000198763 | MT-ND2   | -0.88960606  | 0.00422401 | 0.020221231 |
| ENSG00000225630 | MTND2P28 | -0.915024344 | 0.0015377  | 0.009045499 |
| ENSG00000198840 | MT-ND3   | -0.715738639 | 0.00211094 | 0.011614827 |
| ENSG00000211459 | MT-RNR1  | -0.941382333 | 0.00595068 | 0.026386902 |
| ENSG00000210082 | MT-RNR2  | -0.873572679 | 0.01157276 | 0.044459971 |
| ENSG00000210176 | MT-TH    | -0.922085169 | 0.00436624 | 0.020746251 |
| ENSG00000210100 | MT-TI    | -1.115764631 | 0.00052388 | 0.003795806 |
| ENSG00000210112 | MT-TM    | -0.84501348  | 0.00384184 | 0.018757325 |
| ENSG00000138823 | MTTP     | -0.589571596 | 0.00077866 | 0.005191879 |
| ENSG00000210184 | MT-TS2   | -1.292765893 | 6.14E-06   | 9.78E-05    |
| ENSG00000210195 | MT-TT    | -0.961364243 | 0.00084855 | 0.005581612 |
| ENSG00000180354 | MTURN    | 0.717005916  | 3.25E-10   | 2.16E-08    |
| ENSG00000132938 | MTUS2    | -1.157483791 | 7.58E-24   | 1.12E-20    |
| ENSG00000030304 | MUSK     | -0.606751431 | 0.00071731 | 0.004887193 |
| ENSG00000101825 | MXRA5    | 1.626913124  | 9.22E-11   | 7.27E-09    |
| ENSG00000162576 | MXRA8    | 0.622021594  | 0.00045618 | 0.003400366 |
| ENSG00000185697 | MYBL1    | 0.652549461  | 1.96E-05   | 0.000257324 |
| ENSG00000196091 | MYBPC1   | -1.03584272  | 3.60E-05   | 0.000423276 |
| ENSG00000133026 | MYH10    | 0.760829725  | 2.06E-05   | 0.000267202 |
| ENSG00000133392 | MYH11    | 0.849721557  | 0.00035008 | 0.002741962 |
| ENSG00000197616 | MYH6     | -1.96331138  | 5.20E-11   | 4.46E-09    |
| ENSG00000160808 | MYL3     | -0.609845127 | 1.20E-06   | 2.48E-05    |
| ENSG00000266714 | MYO15B   | 0.618009009  | 3.54E-06   | 6.16E-05    |
| ENSG00000041515 | MYO16    | -0.638219051 | 0.00134371 | 0.008114944 |
| ENSG00000196535 | MYO18A   | 0.588279244  | 8.78E-09   | 3.70E-07    |
| ENSG00000133454 | MYO18B   | 0.70510473   | 3.62E-09   | 1.76E-07    |
| ENSG00000176658 | MYO1D    | 0.740848004  | 0.00024186 | 0.002032227 |
| ENSG00000167306 | MYO5B    | 0.875427101  | 0.00042024 | 0.003174609 |
| ENSG00000137474 | MYO7A    | -0.649451053 | 6.67E-05   | 0.000704116 |
| ENSG00000034971 | MYOC     | 0.91461134   | 0.00088709 | 0.005790769 |
| ENSG00000120729 | MYOT     | -1.40291721  | 3.62E-15   | 1.07E-12    |
| ENSG00000177791 | MYOZ1    | 0.900694358  | 0.00169329 | 0.009751831 |
| ENSG00000249437 | NAIP     | -0.867182649 | 0.00028928 | 0.002346216 |
| ENSG00000254759 | NAP1L1P1 | 0.621196027  | 0.00270098 | 0.014198663 |

|                 |           |              |            |             |
|-----------------|-----------|--------------|------------|-------------|
| ENSG00000186310 | NAP1L3    | 0.616848335  | 6.90E-05   | 0.000724274 |
| ENSG00000166833 | NAV2      | 0.819589526  | 9.08E-10   | 5.26E-08    |
| ENSG00000273136 | NBPF26    | 0.648482228  | 0.0126967  | 0.047705202 |
| ENSG00000104490 | NCALD     | -0.6091889   | 7.72E-08   | 2.37E-06    |
| ENSG00000154654 | NCAM2     | -0.810357345 | 4.41E-09   | 2.06E-07    |
| ENSG00000020129 | NCDN      | 0.857954296  | 7.64E-15   | 2.12E-12    |
| ENSG00000100365 | NCF4      | -0.818249881 | 9.96E-06   | 0.000146038 |
| ENSG00000188211 | NCR3LG1   | 1.215309269  | 1.17E-16   | 5.00E-14    |
| ENSG00000107130 | NCS1      | 0.615841707  | 0.00016926 | 0.0015156   |
| ENSG00000072864 | NDE1      | 0.592197361  | 1.43E-09   | 7.85E-08    |
| ENSG00000165795 | NDRG2     | -0.725617775 | 4.73E-29   | 2.79E-25    |
| ENSG00000261624 | NDUFB10P2 | -0.86731159  | 9.60E-05   | 0.000944736 |
| ENSG00000172260 | NEGR1     | -0.87318288  | 4.44E-10   | 2.84E-08    |
| ENSG00000163491 | NEK10     | -0.731464504 | 1.86E-06   | 3.55E-05    |
| ENSG00000197168 | NEK5      | 0.853885962  | 1.16E-05   | 0.000166248 |
| ENSG00000132688 | NES       | 0.798202173  | 1.19E-06   | 2.44E-05    |
| ENSG00000134259 | NGF       | -0.896797472 | 3.50E-08   | 1.21E-06    |
| ENSG00000116962 | NID1      | -0.650500815 | 6.13E-06   | 9.77E-05    |
| ENSG00000146938 | NLGN4X    | -0.782289071 | 5.61E-05   | 0.000608766 |
| ENSG00000165246 | NLGN4Y    | 0.759891177  | 0.00868535 | 0.035551146 |
| ENSG00000243678 | NME2      | -0.59523782  | 2.31E-06   | 4.24E-05    |
| ENSG00000148400 | NOTCH1    | 0.773408723  | 7.35E-08   | 2.30E-06    |
| ENSG00000074181 | NOTCH3    | 0.664826131  | 0.00052765 | 0.003814894 |
| ENSG00000136999 | NOV       | 0.799570251  | 0.00198896 | 0.011083369 |
| ENSG00000107281 | NPDC1     | 0.61764978   | 7.20E-05   | 0.000750197 |
| ENSG00000131697 | NPHP4     | 0.863363021  | 2.46E-10   | 1.69E-08    |
| ENSG00000175206 | NPPA      | 1.831385102  | 1.79E-14   | 4.31E-12    |
| ENSG00000242349 | NPPA-AS1  | 1.19260701   | 5.07E-05   | 0.000560465 |
| ENSG00000120937 | NPPB      | 1.875502549  | 6.19E-17   | 2.98E-14    |
| ENSG00000106236 | NPTX2     | -0.748635644 | 0.00982139 | 0.039137496 |
| ENSG00000181019 | NQO1      | -1.062952756 | 1.69E-13   | 2.94E-11    |
| ENSG00000119508 | NR4A3     | 1.066675994  | 0.00010451 | 0.001008852 |
| ENSG00000198435 | NRARP     | 1.186441682  | 1.09E-08   | 4.43E-07    |
| ENSG00000137404 | NRM       | -0.631852515 | 7.54E-05   | 0.000777362 |
| ENSG00000118257 | NRP2      | 0.645165011  | 5.10E-05   | 0.000562961 |
| ENSG00000179915 | NRXN1     | -0.905557927 | 3.09E-05   | 0.000372302 |
| ENSG00000168824 | NSG1      | -2.08874623  | 7.83E-21   | 9.23E-18    |
| ENSG00000182667 | NTM       | 0.640384351  | 0.00897783 | 0.036438339 |
| ENSG00000196358 | NTNG2     | 1.139064493  | 3.53E-08   | 1.22E-06    |
| ENSG00000198088 | NUP62CL   | 1.160542596  | 2.04E-07   | 5.41E-06    |
| ENSG00000154358 | OBSCN     | 0.735762195  | 4.69E-09   | 2.19E-07    |
| ENSG00000115758 | ODC1      | 0.878241946  | 4.36E-19   | 3.43E-16    |
| ENSG00000177989 | ODF3B     | 0.670628529  | 0.00188254 | 0.010601648 |

|                 |         |              |            |             |
|-----------------|---------|--------------|------------|-------------|
| ENSG00000197444 | OGDHL   | 2.048045351  | 1.11E-14   | 2.85E-12    |
| ENSG00000106809 | OGN     | 0.874858274  | 0.00011075 | 0.00106145  |
| ENSG00000185585 | OLFML2A | 0.621017307  | 3.14E-05   | 0.000375768 |
| ENSG00000127083 | OMD     | 0.634596699  | 0.00287847 | 0.014945113 |
| ENSG00000054277 | OPN3    | -0.714589035 | 3.79E-08   | 1.29E-06    |
| ENSG00000079156 | OSBPL6  | 0.772748082  | 8.28E-11   | 6.74E-09    |
| ENSG00000006025 | OSBPL7  | 0.65719213   | 5.73E-09   | 2.57E-07    |
| ENSG00000165899 | OTOGL   | -0.598881138 | 0.00079968 | 0.005314028 |
| ENSG00000165312 | OTUD1   | 0.689999695  | 0.00135265 | 0.008154315 |
| ENSG00000108405 | P2RX1   | 1.194756062  | 4.17E-05   | 0.000479417 |
| ENSG00000099957 | P2RX6   | 0.912071298  | 4.26E-05   | 0.000486817 |
| ENSG00000169860 | P2RY1   | -0.600798926 | 1.02E-05   | 0.00014857  |
| ENSG00000182162 | P2RY8   | 0.589278395  | 0.00614415 | 0.027046429 |
| ENSG00000090530 | P3H2    | 1.5078638    | 2.46E-09   | 1.26E-07    |
| ENSG00000110811 | P3H3    | 0.86349644   | 5.07E-11   | 4.38E-09    |
| ENSG00000178467 | P4HTM   | 0.865447168  | 1.30E-15   | 4.27E-13    |
| ENSG00000101104 | PABPC1L | 0.644899565  | 0.00040216 | 0.003062478 |
| ENSG00000158006 | PAFAH2  | 0.663313014  | 2.12E-11   | 2.12E-09    |
| ENSG00000107719 | PALD1   | 0.647469752  | 2.40E-07   | 6.24E-06    |
| ENSG00000129116 | PALLD   | -0.594505987 | 1.78E-08   | 6.75E-07    |
| ENSG00000100767 | PAPLN   | 0.793540158  | 0.00050355 | 0.0036756   |
| ENSG00000182752 | PAPPA   | 0.604041594  | 0.00029231 | 0.002365881 |
| ENSG00000178184 | PARD6G  | 0.689648122  | 0.00017505 | 0.001553868 |
| ENSG00000178685 | PARP10  | 0.619822596  | 2.53E-05   | 0.000315393 |
| ENSG00000188677 | PARVB   | -0.843809215 | 5.04E-10   | 3.18E-08    |
| ENSG00000135749 | PCNX2   | 0.730914806  | 1.25E-05   | 0.000176889 |
| ENSG00000163710 | PCOLCE2 | 0.864105806  | 2.88E-08   | 1.04E-06    |
| ENSG00000125851 | PCSK2   | -0.925477904 | 0.00125762 | 0.007701528 |
| ENSG00000140479 | PCSK6   | 0.683205822  | 1.21E-05   | 0.000172436 |
| ENSG00000152270 | PDE3B   | 0.672628988  | 1.02E-10   | 7.89E-09    |
| ENSG00000184588 | PDE4B   | 0.990709     | 3.76E-06   | 6.48E-05    |
| ENSG00000113231 | PDE8B   | 1.166122879  | 8.01E-06   | 0.000122244 |
| ENSG00000134853 | PDGFRA  | -0.681700506 | 1.53E-05   | 0.000209807 |
| ENSG00000067840 | PDZD4   | 1.030335273  | 2.90E-07   | 7.29E-06    |
| ENSG00000134020 | PEBP4   | -0.843174563 | 1.26E-06   | 2.55E-05    |
| ENSG00000141456 | PELP1   | 0.692165111  | 7.65E-10   | 4.55E-08    |
| ENSG00000181195 | PENK    | 1.907453476  | 2.03E-11   | 2.05E-09    |
| ENSG00000132326 | PER2    | 1.038148788  | 3.44E-10   | 2.27E-08    |
| ENSG00000101132 | PFDN4   | -0.677786054 | 2.74E-07   | 6.95E-06    |
| ENSG00000177614 | PGBD5   | 0.780894562  | 2.36E-07   | 6.14E-06    |
| ENSG00000119630 | PGF     | 0.832528043  | 8.12E-05   | 0.000826291 |
| ENSG00000087495 | PHACTR3 | -1.3889323   | 3.11E-07   | 7.73E-06    |
| ENSG00000116273 | PHF13   | 0.671986058  | 8.92E-08   | 2.68E-06    |

|                 |          |              |            |             |
|-----------------|----------|--------------|------------|-------------|
| ENSG00000139289 | PHLDA1   | 1.237355751  | 2.48E-11   | 2.42E-09    |
| ENSG00000174307 | PHLDA3   | 0.689831218  | 2.70E-05   | 0.000331742 |
| ENSG00000168490 | PHYHIP   | 1.331656608  | 3.36E-07   | 8.26E-06    |
| ENSG00000164530 | PI16     | 1.290981247  | 7.04E-09   | 3.07E-07    |
| ENSG00000153823 | PID1     | -0.786817397 | 1.92E-11   | 1.97E-09    |
| ENSG00000154864 | PIEZO2   | 1.144080248  | 9.84E-05   | 0.000962628 |
| ENSG00000173947 | PIFO     | -0.765285696 | 7.15E-06   | 0.000110925 |
| ENSG00000155629 | PIK3AP1  | -0.607630825 | 0.00061305 | 0.004291518 |
| ENSG00000100100 | PIK3IP1  | 0.691839276  | 1.04E-05   | 0.000151098 |
| ENSG00000276231 | PIK3R6   | 0.82318808   | 0.0005993  | 0.004222883 |
| ENSG00000008710 | PKD1     | 0.8541145    | 5.65E-11   | 4.79E-09    |
| ENSG00000250251 | PKD1P6   | 0.701637389  | 2.98E-05   | 0.000361339 |
| ENSG00000205038 | PKHD1L1  | -1.193224429 | 0.00013352 | 0.001240808 |
| ENSG00000144837 | PLA1A    | -0.772487285 | 0.00022057 | 0.001885531 |
| ENSG00000188257 | PLA2G2A  | -1.322008587 | 0.00021764 | 0.001863872 |
| ENSG00000138193 | PLCE1    | 1.145355579  | 9.20E-15   | 2.49E-12    |
| ENSG00000114805 | PLCH1    | -0.872498492 | 0.00074637 | 0.005028242 |
| ENSG00000178209 | PLEC     | 0.724706733  | 4.12E-07   | 9.92E-06    |
| ENSG00000115956 | PLEK     | -0.652640911 | 0.00664538 | 0.028743008 |
| ENSG00000171680 | PLEKHG5  | 0.737646982  | 3.35E-12   | 4.14E-10    |
| ENSG00000152527 | PLEKHH2  | 0.943173145  | 8.11E-07   | 1.77E-05    |
| ENSG00000166819 | PLIN1    | 0.867475423  | 0.00159579 | 0.009305951 |
| ENSG00000147872 | PLIN2    | -0.752384226 | 2.76E-05   | 0.000338737 |
| ENSG00000214456 | PLIN5    | -0.61430795  | 0.00039295 | 0.003008124 |
| ENSG00000173846 | PLK3     | 1.052123738  | 2.91E-08   | 1.05E-06    |
| ENSG00000102934 | PLLP     | -0.812090178 | 1.07E-06   | 2.24E-05    |
| ENSG00000198523 | PLN      | -0.775310436 | 9.57E-09   | 3.97E-07    |
| ENSG00000123560 | PLP1     | -1.521310211 | 3.31E-11   | 3.08E-09    |
| ENSG00000102007 | PLP2     | -0.800066804 | 3.45E-08   | 1.20E-06    |
| ENSG00000117600 | PLPPR4   | 1.251366375  | 8.33E-06   | 0.000126115 |
| ENSG00000100979 | PLTP     | -0.897495832 | 4.62E-05   | 0.000519648 |
| ENSG00000161381 | PLXDC1   | 0.730764777  | 1.44E-07   | 4.04E-06    |
| ENSG00000176903 | PNMA1    | 0.616139262  | 1.12E-06   | 2.32E-05    |
| ENSG00000183837 | PNMA3    | -0.673069896 | 0.00856967 | 0.035187604 |
| ENSG00000141744 | PNMT     | -0.62705713  | 0.00031773 | 0.002532528 |
| ENSG00000114631 | PODXL2   | 1.388937897  | 9.41E-11   | 7.40E-09    |
| ENSG00000137054 | POLR1E   | 0.645640971  | 1.06E-08   | 4.31E-07    |
| ENSG00000224897 | POT1-AS1 | -0.973690454 | 1.48E-08   | 5.79E-07    |
| ENSG00000143847 | PPFIA4   | 0.676507739  | 0.00011341 | 0.001081655 |
| ENSG00000118898 | PPL      | -0.828074461 | 6.77E-06   | 0.000105923 |
| ENSG00000204619 | PPP1R11  | -0.651585884 | 6.51E-07   | 1.46E-05    |
| ENSG00000135447 | PPP1R1A  | -0.968855403 | 1.98E-07   | 5.30E-06    |
| ENSG00000150722 | PPP1R1C  | -0.685937478 | 3.78E-06   | 6.50E-05    |

|                 |           |              |            |             |
|-----------------|-----------|--------------|------------|-------------|
| ENSG00000104866 | PPP1R37   | 0.590938594  | 6.89E-08   | 2.17E-06    |
| ENSG00000156475 | PPP2R2B   | 0.776928846  | 0.00401875 | 0.019419961 |
| ENSG00000214140 | PRCD      | 0.665814004  | 0.00026134 | 0.002158174 |
| ENSG00000186314 | PRELID2   | -2.076682134 | 5.89E-39   | 1.39E-34    |
| ENSG00000116690 | PRG4      | 1.062555001  | 0.00017501 | 0.001553868 |
| ENSG00000282961 | PRNCR1    | -0.805284197 | 3.42E-06   | 5.97E-05    |
| ENSG00000101000 | PROCR     | -0.595873713 | 0.00016554 | 0.001487968 |
| ENSG00000007062 | PROM1     | 1.187737249  | 8.00E-07   | 1.76E-05    |
| ENSG00000155066 | PROM2     | 0.910575735  | 9.59E-07   | 2.04E-05    |
| ENSG00000184500 | PROS1     | 0.595276901  | 0.00061875 | 0.0043258   |
| ENSG00000135362 | PRR5L     | 0.872936615  | 3.62E-06   | 6.28E-05    |
| ENSG00000130962 | PRRG1     | -0.680071685 | 3.88E-14   | 8.55E-12    |
| ENSG00000205155 | PSENEEN   | -0.606802854 | 1.09E-10   | 8.35E-09    |
| ENSG00000244694 | PTCHD4    | 0.75470316   | 0.00339485 | 0.016980554 |
| ENSG00000156471 | PTDSS1    | -0.826204489 | 1.58E-06   | 3.08E-05    |
| ENSG00000122420 | PTGFR     | 1.315095212  | 1.98E-07   | 5.29E-06    |
| ENSG00000134247 | PTGFRN    | 0.783221041  | 8.87E-11   | 7.09E-09    |
| ENSG00000095303 | PTGS1     | -0.759697579 | 9.50E-06   | 0.000140059 |
| ENSG00000112655 | PTK7      | 0.749979816  | 0.00011795 | 0.001115896 |
| ENSG00000105894 | PTN       | 0.77376098   | 1.54E-05   | 0.000210665 |
| ENSG00000142949 | PTPRF     | 0.616368505  | 0.0118171  | 0.045168811 |
| ENSG00000080031 | PTPRH     | 0.863930545  | 0.000124   | 0.001164315 |
| ENSG00000151490 | PTPRO     | -0.652070254 | 0.01001611 | 0.039788785 |
| ENSG00000163661 | PTX3      | 1.001455057  | 0.00077335 | 0.005165256 |
| ENSG00000177192 | PUS1      | 0.804476137  | 1.03E-08   | 4.23E-07    |
| ENSG00000147485 | PXDNL     | 0.716710674  | 1.60E-07   | 4.39E-06    |
| ENSG00000104524 | PYCRL     | 0.78845611   | 8.43E-06   | 0.000127122 |
| ENSG00000171016 | PYGO1     | -0.721078649 | 2.15E-06   | 3.99E-05    |
| ENSG00000115828 | QPCT      | 0.786161931  | 0.00014577 | 0.00133678  |
| ENSG00000213339 | QTRT1     | 0.629661663  | 3.24E-09   | 1.59E-07    |
| ENSG00000090565 | RAB11FIP3 | 0.633076879  | 6.62E-09   | 2.91E-07    |
| ENSG00000139832 | RAB20     | 0.660538916  | 3.31E-05   | 0.000393827 |
| ENSG00000276600 | RAB7B     | 0.592250587  | 0.00217363 | 0.011862903 |
| ENSG00000152061 | RABGAP1L  | 0.619329449  | 7.85E-08   | 2.39E-06    |
| ENSG00000214842 | RAD51AP2  | 1.035309715  | 6.94E-06   | 0.000108182 |
| ENSG00000116191 | RALGPS2   | -0.843589646 | 9.25E-15   | 2.49E-12    |
| ENSG00000164188 | RANBP3L   | -0.602488652 | 0.00710686 | 0.030283476 |
| ENSG00000225125 | RANP4     | 0.923937374  | 1.33E-07   | 3.79E-06    |
| ENSG00000165917 | RAPSN     | 0.685789793  | 0.0024191  | 0.012959582 |
| ENSG00000118849 | RARRES1   | -1.849228389 | 1.08E-08   | 4.40E-07    |
| ENSG00000172575 | RASGRP1   | 0.934349959  | 0.00028058 | 0.002286227 |
| ENSG00000105538 | RASIP1    | 0.688583022  | 8.77E-07   | 1.89E-05    |
| ENSG00000270885 | RASL10B   | -0.815945009 | 6.38E-08   | 2.03E-06    |

|                 |               |              |            |             |
|-----------------|---------------|--------------|------------|-------------|
| ENSG00000128045 | RASL11B       | 0.61543853   | 0.00684257 | 0.029407071 |
| ENSG00000163694 | RBM47         | -0.785035012 | 0.00027904 | 0.002275831 |
| ENSG00000114115 | RBP1          | -0.662969673 | 1.43E-05   | 0.000199042 |
| ENSG00000173653 | RCE1          | 0.670374794  | 3.00E-06   | 5.33E-05    |
| ENSG00000100918 | REC8          | 0.767594665  | 5.51E-06   | 8.94E-05    |
| ENSG00000168476 | REEP4         | 0.627966781  | 0.00029316 | 0.002369515 |
| ENSG00000054967 | RELT          | 0.8147377    | 1.06E-05   | 0.000153249 |
| ENSG00000169891 | REPS2         | -0.752083362 | 4.98E-05   | 0.00055263  |
| ENSG00000135945 | REV1          | -0.759080681 | 1.10E-28   | 5.17E-25    |
| ENSG00000076344 | RGS11         | 1.107467537  | 7.05E-17   | 3.22E-14    |
| ENSG00000117152 | RGS4          | 1.311263224  | 5.01E-07   | 1.17E-05    |
| ENSG00000186326 | RGS9BP        | -0.900247112 | 1.40E-06   | 2.79E-05    |
| ENSG00000174791 | RIN1          | 0.731739899  | 0.00022849 | 0.001937147 |
| ENSG00000200783 | RN7SKP180     | -0.616051027 | 0.00146129 | 0.008673942 |
| ENSG00000199683 | RN7SKP185     | 0.906445992  | 0.0023941  | 0.012851957 |
| ENSG00000201315 | RN7SKP227     | -1.456057115 | 5.27E-07   | 1.22E-05    |
| ENSG00000201793 | RN7SKP9       | -0.614499175 | 0.00144505 | 0.008590504 |
| ENSG00000263426 | RN7SL471P     | -1.654654615 | 7.54E-08   | 2.33E-06    |
| ENSG00000275803 | RN7SL736P     | -0.79062372  | 0.01031223 | 0.040711879 |
| ENSG00000129538 | RNASE1        | -1.068706637 | 6.09E-09   | 2.71E-07    |
| ENSG00000169413 | RNASE6        | -1.044517862 | 2.04E-05   | 0.000265271 |
| ENSG00000101695 | RNF125        | -0.797462186 | 6.09E-08   | 1.95E-06    |
| ENSG00000137393 | RNF144B       | -0.84560787  | 4.12E-11   | 3.69E-09    |
| ENSG00000200795 | RNU4-1        | -0.822408075 | 0.00073347 | 0.004965751 |
| ENSG00000202538 | RNU4-2        | -0.665213534 | 0.00307183 | 0.015720524 |
| ENSG00000262877 | RP11-1055B8.4 | 0.637417291  | 0.00070397 | 0.004827691 |
| ENSG00000259370 | RP11-1069G1C  | 0.639798483  | 0.00167386 | 0.009670319 |
| ENSG00000253369 | RP11-1081M5.  | -1.277427158 | 2.08E-05   | 0.000269541 |
| ENSG00000224886 | RP11-119F19.4 | 0.716348679  | 0.00040228 | 0.003062478 |
| ENSG00000282917 | RP11-121C2.3  | -1.717879349 | 2.29E-06   | 4.20E-05    |
| ENSG00000250775 | RP11-12K22.1  | 0.812208134  | 0.00360681 | 0.017831337 |
| ENSG00000260807 | RP11-161M6.2  | 1.211734927  | 2.95E-08   | 1.06E-06    |
| ENSG00000261428 | RP11-16P6.1   | -0.860959171 | 3.86E-09   | 1.85E-07    |
| ENSG00000278291 | RP11-172H24.4 | 0.932142543  | 6.41E-07   | 1.44E-05    |
| ENSG00000279608 | RP11-182N22.1 | 0.728713894  | 1.82E-12   | 2.43E-10    |
| ENSG00000238102 | RP11-19D2.1   | -0.738596657 | 7.42E-05   | 0.000766658 |
| ENSG00000261997 | RP11-212I21.4 | -0.65989986  | 6.20E-06   | 9.83E-05    |
| ENSG00000225032 | RP11-228B15.4 | 1.060216632  | 4.86E-09   | 2.27E-07    |
| ENSG00000250371 | RP11-22A3.2   | -0.763785802 | 1.23E-05   | 0.000174682 |
| ENSG00000260862 | RP11-22H5.2   | -0.887414204 | 1.65E-06   | 3.19E-05    |
| ENSG00000262903 | RP11-235E17.6 | 0.788831553  | 0.00010366 | 0.001002882 |
| ENSG00000272129 | RP11-250B2.6  | -0.784476892 | 2.97E-08   | 1.06E-06    |
| ENSG00000270194 | RP11-259K5.2  | 0.76696586   | 5.97E-06   | 9.54E-05    |



|                 |               |              |            |             |
|-----------------|---------------|--------------|------------|-------------|
| ENSG00000262155 | RP11-266L9.5  | 0.845273695  | 4.86E-08   | 1.61E-06    |
| ENSG00000242588 | RP11-274B21.1 | 1.20230007   | 4.57E-06   | 7.66E-05    |
| ENSG00000245293 | RP11-286E11.1 | -0.966741918 | 5.07E-10   | 3.19E-08    |
| ENSG00000234106 | RP11-288E14.2 | -0.7819948   | 4.04E-07   | 9.75E-06    |
| ENSG00000279970 | RP11-299G20.1 | 0.739946999  | 0.00058898 | 0.004165078 |
| ENSG00000274995 | RP11-321F6.2  | 0.892593621  | 9.19E-06   | 0.000136516 |
| ENSG00000281106 | RP11-327P2.7  | 0.597703743  | 0.00938185 | 0.037740299 |
| ENSG00000280152 | RP11-331F4.5  | 0.871467897  | 1.71E-08   | 6.56E-07    |
| ENSG00000271833 | RP11-356B19.1 | 0.621135599  | 0.00081575 | 0.005396326 |
| ENSG00000250303 | RP11-356J5.12 | -0.95887054  | 1.22E-13   | 2.21E-11    |
| ENSG00000258676 | RP11-386M24.1 | -0.984200369 | 0.00724007 | 0.030784352 |
| ENSG00000279476 | RP11-391L3.3  | 0.606296476  | 0.00074431 | 0.00501875  |
| ENSG00000273597 | RP11-392A14.1 | 0.699391811  | 0.0012384  | 0.007597675 |
| ENSG00000237807 | RP11-400K9.4  | -1.113075606 | 3.09E-09   | 1.53E-07    |
| ENSG00000230102 | RP11-407B7.1  | 0.800141876  | 2.67E-05   | 0.00032899  |
| ENSG00000261606 | RP11-414J4.2  | -0.727817637 | 0.01248755 | 0.047099514 |
| ENSG00000226900 | RP11-432J24.5 | -0.731171619 | 7.49E-05   | 0.000773341 |
| ENSG00000260267 | RP11-452L6.5  | 0.744950884  | 2.48E-11   | 2.42E-09    |
| ENSG00000278864 | RP11-45M22.2  | 0.845857714  | 4.16E-09   | 1.97E-07    |
| ENSG00000259877 | RP11-46C24.7  | 0.794388321  | 5.65E-09   | 2.54E-07    |
| ENSG00000259953 | RP11-4O1.2    | -0.681523082 | 4.11E-06   | 6.98E-05    |
| ENSG00000260300 | RP11-505K9.4  | 0.607816731  | 0.0033479  | 0.016776512 |
| ENSG00000225339 | RP11-513I15.6 | 0.683312804  | 0.0011224  | 0.007006321 |
| ENSG00000279495 | RP11-521B24.4 | 0.640032128  | 1.83E-05   | 0.000243493 |
| ENSG00000236701 | RP11-549A6.1  | 0.713562532  | 0.00050337 | 0.003675398 |
| ENSG00000259556 | RP11-56B16.2  | -0.815152066 | 2.60E-06   | 4.71E-05    |
| ENSG00000279631 | RP11-573G6.4  | 0.701599585  | 3.85E-05   | 0.000446165 |
| ENSG00000216809 | RP11-57K17.1  | -1.004135294 | 6.06E-11   | 5.06E-09    |
| ENSG00000260398 | RP11-594N15.1 | -0.982041385 | 2.72E-10   | 1.84E-08    |
| ENSG00000261635 | RP11-618N24.1 | -0.654744728 | 0.00061887 | 0.0043258   |
| ENSG00000249460 | RP11-665C14.1 | -0.751187703 | 0.00649331 | 0.028235488 |
| ENSG00000259583 | RP11-66B24.4  | 0.632818052  | 0.00354966 | 0.017574617 |
| ENSG00000182109 | RP11-69E11.4  | 0.915360337  | 3.10E-08   | 1.10E-06    |
| ENSG00000261616 | RP11-6O2.3    | -0.632755048 | 2.83E-05   | 0.000345968 |
| ENSG00000280042 | RP11-71H17.8  | 0.635885279  | 6.75E-05   | 0.000710407 |
| ENSG00000270112 | RP11-742D12.1 | 0.72434275   | 0.00468762 | 0.021860173 |
| ENSG00000260711 | RP11-747H7.3  | -1.517077554 | 3.44E-11   | 3.13E-09    |
| ENSG00000280219 | RP11-752L20.3 | 0.64995424   | 0.00013298 | 0.00123707  |
| ENSG00000278989 | RP11-762L8.6  | -0.656779111 | 1.00E-06   | 2.11E-05    |
| ENSG00000248713 | RP11-766F14.2 | -2.030609133 | 2.58E-12   | 3.26E-10    |
| ENSG00000257259 | RP11-767I20.1 | -0.74364777  | 0.00879126 | 0.035878732 |
| ENSG00000260276 | RP11-77H9.2   | 0.587875059  | 0.00372123 | 0.018285836 |
| ENSG00000229065 | RP11-8O115.4  | -0.606552966 | 0.00487772 | 0.02255825  |

|                 |               |              |            |             |
|-----------------|---------------|--------------|------------|-------------|
| ENSG00000274964 | RP11-817I4.1  | 0.658306264  | 0.00059082 | 0.00417116  |
| ENSG00000276115 | RP11-817I4.2  | 0.904537815  | 4.41E-06   | 7.40E-05    |
| ENSG00000266865 | RP11-848P1.9  | 0.67731796   | 0.0002423  | 0.002033792 |
| ENSG00000279434 | RP11-85K15.3  | 0.985041894  | 4.05E-06   | 6.91E-05    |
| ENSG00000280153 | RP11-876N24.  | 0.609717479  | 0.00072766 | 0.00493699  |
| ENSG00000267279 | RP11-879F14.2 | 0.616276629  | 0.00049106 | 0.003607918 |
| ENSG00000274317 | RP11-93G5.1   | -0.805033319 | 0.00703422 | 0.030044528 |
| ENSG00000183458 | RP11-958N24.  | 1.191112823  | 6.00E-07   | 1.36E-05    |
| ENSG00000263443 | RP11-973F15.2 | -0.736744033 | 0.00689521 | 0.029554079 |
| ENSG00000215769 | RP13-104F24.2 | 0.696573172  | 0.00018799 | 0.001650722 |
| ENSG00000234869 | RP3-439F8.1   | -0.685558471 | 1.58E-05   | 0.000216437 |
| ENSG00000260000 | RP3-467N11.1  | 0.833304367  | 8.60E-05   | 0.00086564  |
| ENSG00000261189 | RP3-512B11.3  | -0.677037956 | 1.10E-07   | 3.23E-06    |
| ENSG00000230910 | RP3-525N10.2  | -0.63411225  | 0.00062351 | 0.004350578 |
| ENSG00000244560 | RP4-800G7.2   | 0.820042454  | 4.30E-06   | 7.24E-05    |
| ENSG00000218018 | RP4-800J21.3  | 0.651995615  | 0.00053691 | 0.0038712   |
| ENSG00000236908 | RP5-1063M23.  | 1.70044317   | 4.02E-10   | 2.62E-08    |
| ENSG00000237686 | RP5-1120P11.2 | 0.641031897  | 0.00105637 | 0.006673614 |
| ENSG00000272894 | RP5-1159O4.1  | 0.721471715  | 7.94E-05   | 0.000812834 |
| ENSG00000280202 | RP5-1180D12.  | -0.94090794  | 7.27E-07   | 1.61E-05    |
| ENSG00000276649 | RP5-858L17.1  | 0.629551802  | 0.00064044 | 0.004455494 |
| ENSG00000228436 | RP5-864K19.4  | 0.689930055  | 8.87E-05   | 0.000887476 |
| ENSG00000232031 | RP5-991C6.4   | -0.79099934  | 1.83E-05   | 0.000243541 |
| ENSG00000259768 | RP5-991G20.1  | 0.763767961  | 2.32E-05   | 0.000294632 |
| ENSG00000103932 | RPAP1         | 0.590644812  | 1.26E-08   | 4.99E-07    |
| ENSG00000139239 | RPL14P1       | -0.61549916  | 0.00045223 | 0.003380532 |
| ENSG00000229659 | RPL26P6       | 0.897245336  | 5.25E-05   | 0.000575808 |
| ENSG00000089157 | RPLP0         | -0.603096423 | 2.00E-07   | 5.33E-06    |
| ENSG00000259001 | RPPH1         | 0.687610667  | 0.0048513  | 0.022458098 |
| ENSG00000101413 | RPRD1B        | -0.592783797 | 1.86E-18   | 1.10E-15    |
| ENSG00000225447 | RPS15AP10     | 0.64929532   | 0.00010454 | 0.001008852 |
| ENSG00000220848 | RPS18P9       | 0.601702676  | 0.0005881  | 0.004161319 |
| ENSG00000230629 | RPS23P8       | -0.758564545 | 4.37E-10   | 2.80E-08    |
| ENSG00000240616 | RPS6P25       | -0.878628059 | 3.16E-10   | 2.11E-08    |
| ENSG00000166592 | RRAD          | 0.730883532  | 0.00011488 | 0.001092619 |
| ENSG00000052749 | RRP12         | 0.592764189  | 0.00166331 | 0.009628248 |
| ENSG00000132881 | RSG1          | 0.765345621  | 2.10E-05   | 0.000271371 |
| ENSG00000124813 | RUNX2         | 0.817489863  | 0.00018603 | 0.001634789 |
| ENSG00000198838 | RYR3          | 1.930625112  | 2.82E-13   | 4.49E-11    |
| ENSG00000197747 | S100A10       | -0.822585774 | 1.33E-08   | 5.26E-07    |
| ENSG00000163191 | S100A11       | -0.663051801 | 0.00276962 | 0.014510986 |
| ENSG00000196154 | S100A4        | -0.819393479 | 2.90E-06   | 5.18E-05    |
| ENSG00000143546 | S100A8        | -1.10846047  | 0.00049002 | 0.003602305 |



|                 |          |              |            |             |
|-----------------|----------|--------------|------------|-------------|
| ENSG00000163220 | S100A9   | -1.419158792 | 7.57E-06   | 0.000116627 |
| ENSG00000267534 | S1PR2    | -0.592675644 | 0.00017472 | 0.001553868 |
| ENSG00000213694 | S1PR3    | -1.348153227 | 1.10E-19   | 1.00E-16    |
| ENSG00000151835 | SACS     | 0.843147569  | 1.59E-13   | 2.79E-11    |
| ENSG00000187634 | SAMD11   | 1.155662695  | 4.66E-05   | 0.000522728 |
| ENSG00000177570 | SAMD12   | 0.721968211  | 6.35E-06   | 0.000100247 |
| ENSG00000101347 | SAMHD1   | -0.779250108 | 2.02E-07   | 5.37E-06    |
| ENSG00000004139 | SARM1    | 0.786489103  | 8.62E-17   | 3.83E-14    |
| ENSG00000122122 | SASH3    | -0.751411097 | 0.00085218 | 0.005599732 |
| ENSG00000100241 | SBF1     | 0.586007341  | 9.23E-06   | 0.000136923 |
| ENSG00000231274 | SBK3     | -0.926084917 | 5.06E-05   | 0.000560465 |
| ENSG00000064932 | SBNO2    | 0.661135418  | 0.00029383 | 0.002373291 |
| ENSG00000198794 | SCAMP5   | 0.78990095   | 5.72E-06   | 9.20E-05    |
| ENSG00000168079 | SCARA5   | -0.802496095 | 0.00038121 | 0.002933351 |
| ENSG00000244486 | SCARF2   | 0.818277237  | 0.00099975 | 0.006398247 |
| ENSG00000145284 | SCD5     | -0.744618917 | 5.95E-06   | 9.51E-05    |
| ENSG00000171951 | SCG2     | 1.32887905   | 2.71E-07   | 6.90E-06    |
| ENSG00000144285 | SCN1A    | -0.852144812 | 0.00386076 | 0.018810736 |
| ENSG00000149575 | SCN2B    | 0.93517716   | 3.07E-13   | 4.86E-11    |
| ENSG00000164106 | SCRG1    | 1.37673266   | 1.55E-06   | 3.02E-05    |
| ENSG00000180900 | SCRIB    | 0.587432749  | 6.76E-05   | 0.000711378 |
| ENSG00000136193 | SCRN1    | 0.608522155  | 2.52E-06   | 4.59E-05    |
| ENSG00000175356 | SCUBE2   | 1.486395654  | 1.37E-11   | 1.49E-09    |
| ENSG00000069188 | SDK2     | 1.05052685   | 5.11E-06   | 8.40E-05    |
| ENSG00000139410 | SDSL     | 1.708655411  | 7.35E-18   | 4.12E-15    |
| ENSG00000141574 | SECTM1   | -0.632332608 | 0.00790586 | 0.03294972  |
| ENSG00000143416 | SELENBP1 | -1.036445234 | 9.25E-13   | 1.33E-10    |
| ENSG00000250722 | SELENOP  | -0.640127047 | 3.82E-05   | 0.000443379 |
| ENSG00000153993 | SEMA3D   | 0.634923196  | 0.00532419 | 0.024186588 |
| ENSG0000010319  | SEMA3G   | 0.671930241  | 1.97E-07   | 5.28E-06    |
| ENSG00000168758 | SEMA4C   | 0.630780281  | 5.83E-06   | 9.34E-05    |
| ENSG00000082684 | SEMA5B   | 0.71145073   | 4.69E-05   | 0.000524803 |
| ENSG00000135919 | SERPINE2 | 1.14153026   | 5.15E-07   | 1.19E-05    |
| ENSG00000149131 | SERPING1 | -0.945609402 | 2.05E-05   | 0.000266307 |
| ENSG00000197019 | SERTAD1  | 0.68531164   | 0.00014092 | 0.001298342 |
| ENSG00000130766 | SESN2    | 0.624941292  | 6.36E-06   | 0.000100311 |
| ENSG00000100095 | SEZ6L    | 1.885419395  | 1.95E-11   | 1.98E-09    |
| ENSG00000104332 | SFRP1    | 1.039027835  | 1.49E-05   | 0.000205695 |
| ENSG00000106483 | SFRP4    | 2.176016862  | 2.10E-16   | 8.55E-14    |
| ENSG00000214193 | SH3D21   | 0.846107648  | 7.12E-08   | 2.23E-06    |
| ENSG00000107295 | SH3GL2   | 0.752529984  | 0.00498159 | 0.022908313 |
| ENSG00000147010 | SH3KBP1  | -0.658743067 | 2.09E-07   | 5.52E-06    |
| ENSG00000156463 | SH3RF2   | -1.284854285 | 1.41E-16   | 5.94E-14    |

|                 |          |              |            |             |
|-----------------|----------|--------------|------------|-------------|
| ENSG00000172985 | SH3RF3   | 0.749581997  | 1.28E-09   | 7.05E-08    |
| ENSG00000125089 | SH3TC1   | 0.590419845  | 0.00157821 | 0.009222854 |
| ENSG00000251322 | SHANK3   | 0.608258647  | 1.45E-05   | 0.000201047 |
| ENSG00000107338 | SHB      | 0.991646858  | 1.39E-12   | 1.93E-10    |
| ENSG00000178343 | SHISA3   | -0.894892548 | 0.00010209 | 0.000991328 |
| ENSG00000198892 | SHISA4   | -0.980124422 | 1.45E-15   | 4.44E-13    |
| ENSG00000105738 | SIPA1L3  | 0.636508483  | 5.00E-07   | 1.17E-05    |
| ENSG00000196209 | SIRPB2   | -0.59394517  | 0.01181857 | 0.045168811 |
| ENSG00000157933 | SKI      | 0.632500951  | 0.0004194  | 0.003170301 |
| ENSG00000155926 | SLA      | -0.586403721 | 0.01018947 | 0.040382759 |
| ENSG00000113504 | SLC12A7  | 0.65052074   | 1.55E-06   | 3.03E-05    |
| ENSG00000163406 | SLC15A2  | -0.593607575 | 0.00137683 | 0.008264112 |
| ENSG00000112394 | SLC16A10 | 0.601350325  | 0.00037396 | 0.002892758 |
| ENSG00000170190 | SLC16A5  | 0.772014023  | 2.02E-07   | 5.37E-06    |
| ENSG00000108932 | SLC16A6  | 1.385300703  | 1.85E-06   | 3.53E-05    |
| ENSG00000165449 | SLC16A9  | 1.469837189  | 4.49E-14   | 9.62E-12    |
| ENSG00000106688 | SLC1A1   | -0.87409396  | 6.28E-08   | 2.00E-06    |
| ENSG00000197208 | SLC22A4  | 0.800413082  | 0.0001081  | 0.001038588 |
| ENSG00000162461 | SLC25A34 | -0.820190754 | 0.00014812 | 0.001355178 |
| ENSG00000005022 | SLC25A5  | 0.591658165  | 3.41E-06   | 5.95E-05    |
| ENSG00000181045 | SLC26A11 | 0.625236034  | 4.81E-06   | 7.97E-05    |
| ENSG00000174502 | SLC26A9  | -1.434718036 | 2.48E-17   | 1.27E-14    |
| ENSG00000133460 | SLC2A11  | 0.641267176  | 2.02E-10   | 1.42E-08    |
| ENSG00000185031 | SLC2A3P2 | 0.605525634  | 0.00019735 | 0.001723928 |
| ENSG00000158014 | SLC30A2  | 1.327835724  | 5.83E-08   | 1.88E-06    |
| ENSG00000136867 | SLC31A2  | -0.634711116 | 6.17E-06   | 9.80E-05    |
| ENSG00000215790 | SLC35E2  | 0.650957777  | 0.00083901 | 0.005530132 |
| ENSG00000196376 | SLC35F1  | -0.960105892 | 6.69E-07   | 1.49E-05    |
| ENSG00000180773 | SLC36A4  | -0.763420944 | 1.04E-18   | 6.65E-16    |
| ENSG00000160190 | SLC37A1  | 0.691725536  | 6.85E-12   | 8.07E-10    |
| ENSG00000169507 | SLC38A11 | 0.717019592  | 0.00912447 | 0.03691909  |
| ENSG00000133065 | SLC41A1  | -0.63658264  | 5.63E-07   | 1.29E-05    |
| ENSG00000167703 | SLC43A2  | 1.049497194  | 8.67E-10   | 5.07E-08    |
| ENSG00000142494 | SLC47A1  | 0.782107826  | 3.32E-07   | 8.20E-06    |
| ENSG00000050438 | SLC4A8   | 1.284761422  | 3.06E-07   | 7.64E-06    |
| ENSG00000100170 | SLC5A1   | -0.857350002 | 1.38E-05   | 0.000192811 |
| ENSG00000157103 | SLC6A1   | 0.80293473   | 1.17E-05   | 0.000167605 |
| ENSG00000010379 | SLC6A13  | 0.809213461  | 3.20E-06   | 5.61E-05    |
| ENSG00000131389 | SLC6A6   | 1.023389459  | 1.04E-05   | 0.000151394 |
| ENSG00000103257 | SLC7A5   | 0.745492762  | 0.00327172 | 0.016471775 |
| ENSG00000155465 | SLC7A7   | -0.894630782 | 3.91E-05   | 0.000451858 |
| ENSG00000092068 | SLC7A8   | -0.75233253  | 8.79E-06   | 0.000131557 |
| ENSG00000090020 | SLC9A1   | 0.698922168  | 0.00077808 | 0.005189464 |

|                 |             |              |            |             |
|-----------------|-------------|--------------|------------|-------------|
| ENSG00000135740 | SLC9A5      | 0.737332034  | 8.62E-05   | 0.000867511 |
| ENSG00000065923 | SLC9A7      | -0.794041825 | 5.79E-11   | 4.89E-09    |
| ENSG00000181804 | SLC9A9      | -0.695298802 | 1.53E-05   | 0.000209831 |
| ENSG00000139155 | SLCO1C1     | 0.8724247    | 4.51E-05   | 0.000510235 |
| ENSG00000101187 | SLCO4A1     | -1.086453311 | 0.00022099 | 0.001888498 |
| ENSG00000179542 | SLITRK4     | 0.900312015  | 0.00151757 | 0.008944965 |
| ENSG00000184564 | SLITRK6     | -1.169212706 | 2.66E-05   | 0.000327593 |
| ENSG00000170290 | SLN         | -1.182304114 | 0.00013404 | 0.00124416  |
| ENSG00000137834 | SMAD6       | 0.842760387  | 8.07E-07   | 1.77E-05    |
| ENSG00000101665 | SMAD7       | 0.751746519  | 1.08E-06   | 2.25E-05    |
| ENSG00000120693 | SMAD9       | 0.629531054  | 0.0007136  | 0.004870851 |
| ENSG00000270332 | SMC2-AS1    | -1.13223998  | 2.15E-10   | 1.51E-08    |
| ENSG00000214097 | SMCO1       | -0.895262025 | 5.64E-07   | 1.29E-05    |
| ENSG00000237296 | SMG1P1      | 0.620241779  | 0.00140632 | 0.008415437 |
| ENSG00000180747 | SMG1P3      | 0.60406791   | 0.00019009 | 0.001667311 |
| ENSG00000183604 | SMG1P5      | 0.803591923  | 0.00082137 | 0.005427558 |
| ENSG00000256235 | SMIM3       | -0.680499299 | 4.29E-10   | 2.78E-08    |
| ENSG00000198732 | SMOC1       | -0.996697792 | 0.00178126 | 0.010168728 |
| ENSG00000112562 | SMOC2       | 1.502335938  | 1.98E-27   | 5.19E-24    |
| ENSG00000088826 | SMOX        | 0.715525595  | 0.00011171 | 0.001069132 |
| ENSG00000188176 | SMTNL2      | -0.758023371 | 0.00020188 | 0.001756377 |
| ENSG00000115593 | SMYD1       | -0.783496245 | 2.61E-11   | 2.54E-09    |
| ENSG00000124216 | SNAI1       | 0.818279433  | 0.00571444 | 0.02553626  |
| ENSG00000143740 | SNAP47      | 1.364918512  | 1.09E-12   | 1.52E-10    |
| ENSG00000145335 | SNCA        | 0.94204262   | 5.56E-06   | 9.02E-05    |
| ENSG00000212443 | SNORA53     | -1.034515695 | 1.12E-06   | 2.33E-05    |
| ENSG00000200959 | SNORA74A    | -0.954921107 | 7.61E-06   | 0.000116814 |
| ENSG00000212402 | SNORA74B    | -0.646442947 | 0.00351143 | 0.017425612 |
| ENSG00000207279 | SNORD116-24 | -0.648378226 | 0.00080035 | 0.005316961 |
| ENSG00000207445 | SNORD15B    | -0.728605864 | 0.00707667 | 0.030171187 |
| ENSG00000120833 | SOCS2       | 0.926552635  | 5.86E-11   | 4.92E-09    |
| ENSG00000246985 | SOCS2-AS1   | 0.995339888  | 5.60E-08   | 1.82E-06    |
| ENSG00000109610 | SOD3        | 0.699217249  | 0.00104361 | 0.006610759 |
| ENSG00000108018 | SORCS1      | -1.181534994 | 9.98E-08   | 2.97E-06    |
| ENSG00000137642 | SORL1       | 0.662699083  | 1.23E-05   | 0.000174977 |
| ENSG00000164736 | SOX17       | 0.616557439  | 0.0067236  | 0.02902274  |
| ENSG00000203883 | SOX18       | 0.967214524  | 2.99E-05   | 0.000362862 |
| ENSG00000005513 | SOX8        | 1.225479578  | 1.02E-07   | 3.02E-06    |
| ENSG00000165698 | SPACA9      | 0.798108184  | 2.53E-08   | 9.26E-07    |
| ENSG00000152583 | SPARCL1     | -0.89395926  | 9.04E-20   | 8.52E-17    |
| ENSG00000163071 | SPATA18     | 0.771181103  | 5.85E-05   | 0.000630974 |
| ENSG00000158792 | SPATA2L     | 0.702590804  | 0.00119669 | 0.007382111 |
| ENSG00000106686 | SPATA6L     | 0.60230233   | 0.00058005 | 0.004117026 |

|                 |            |              |            |             |
|-----------------|------------|--------------|------------|-------------|
| ENSG00000161888 | SPC24      | -0.657095953 | 0.00305141 | 0.015639804 |
| ENSG00000070182 | SPTB       | 0.617191218  | 8.95E-09   | 3.77E-07    |
| ENSG00000173898 | SPTBN2     | 0.814325572  | 0.00151287 | 0.008920756 |
| ENSG00000160460 | SPTBN4     | 1.05287966   | 6.86E-13   | 1.00E-10    |
| ENSG00000165389 | SPTSSA     | -0.658841587 | 3.40E-11   | 3.12E-09    |
| ENSG00000122862 | SRGN       | -0.68600445  | 0.00010568 | 0.001017791 |
| ENSG00000130511 | SSBP4      | 0.672629005  | 2.00E-05   | 0.000261622 |
| ENSG00000179954 | SSC5D      | 1.246395183  | 5.77E-07   | 1.31E-05    |
| ENSG00000115525 | ST3GAL5    | -0.831876834 | 7.25E-11   | 5.98E-09    |
| ENSG00000144057 | ST6GAL2    | 0.750688587  | 0.01037099 | 0.040875445 |
| ENSG00000184005 | ST6GALNAC3 | -0.76541321  | 3.70E-09   | 1.79E-07    |
| ENSG00000140557 | ST8SIA2    | 0.77042017   | 0.00024709 | 0.002061471 |
| ENSG00000101638 | ST8SIA5    | 1.471570636  | 2.79E-10   | 1.88E-08    |
| ENSG00000148488 | ST8SIA6    | -0.821428344 | 1.09E-10   | 8.33E-09    |
| ENSG00000214530 | STARD10    | -0.694157403 | 5.21E-12   | 6.26E-10    |
| ENSG00000138378 | STAT4      | 1.327858615  | 1.62E-06   | 3.13E-05    |
| ENSG00000159167 | STC1       | 1.099768453  | 9.99E-05   | 0.000974479 |
| ENSG00000127954 | STEAP4     | -0.772096317 | 1.38E-05   | 0.00019373  |
| ENSG00000134602 | STK26      | -0.949619167 | 3.47E-07   | 8.50E-06    |
| ENSG00000203685 | STUM       | -0.687766868 | 3.39E-05   | 0.000402402 |
| ENSG00000137573 | SULF1      | 0.893071307  | 1.76E-05   | 0.000236636 |
| ENSG00000173705 | SUSD5      | 1.098344468  | 1.91E-05   | 0.000251948 |
| ENSG00000165124 | SVEP1      | 0.709224976  | 5.13E-06   | 8.42E-05    |
| ENSG00000166111 | SVOP       | -0.778878204 | 0.00555749 | 0.024991213 |
| ENSG00000008056 | SYN1       | -0.785514291 | 0.00322931 | 0.016324501 |
| ENSG00000162520 | SYNC       | -0.5861885   | 6.17E-06   | 9.80E-05    |
| ENSG00000102003 | SYP        | -0.679091933 | 4.05E-06   | 6.91E-05    |
| ENSG00000103528 | SYT17      | 0.809706173  | 7.23E-05   | 0.000751242 |
| ENSG00000137501 | SYTL2      | 0.699487129  | 4.15E-05   | 0.000477117 |
| ENSG00000147041 | SYTL5      | 1.075130089  | 0.00020038 | 0.001745202 |
| ENSG00000183597 | TANGO2     | 0.610621196  | 2.50E-08   | 9.17E-07    |
| ENSG00000141556 | TBCD       | 0.620670152  | 5.81E-09   | 2.60E-07    |
| ENSG00000121068 | TBX2       | 0.598178413  | 8.16E-07   | 1.78E-05    |
| ENSG00000165929 | TC2N       | -1.595854257 | 1.63E-14   | 3.96E-12    |
| ENSG00000185339 | TCN2       | -0.651640407 | 1.04E-05   | 0.000151558 |
| ENSG00000145022 | TCTA       | 0.618501646  | 3.24E-11   | 3.04E-09    |
| ENSG00000074219 | TEAD2      | -0.769673714 | 3.24E-20   | 3.47E-17    |
| ENSG00000135605 | TEC        | 0.587801239  | 3.77E-05   | 0.000438825 |
| ENSG00000167074 | TEF        | 0.631555166  | 1.65E-05   | 0.000224788 |
| ENSG00000100726 | TELO2      | 0.783120509  | 3.95E-07   | 9.55E-06    |
| ENSG00000149256 | TENM4      | 1.385412305  | 6.89E-16   | 2.46E-13    |
| ENSG00000091513 | TF         | 0.81899214   | 0.00447873 | 0.021105234 |
| ENSG00000105967 | TFEC       | -0.68975715  | 0.00179595 | 0.010240171 |

|                 |             |              |            |             |
|-----------------|-------------|--------------|------------|-------------|
| ENSG00000003436 | TFPI        | -0.861779628 | 6.80E-11   | 5.64E-09    |
| ENSG00000105825 | TFPI2       | -0.742427847 | 0.00103627 | 0.006578367 |
| ENSG00000072274 | TFRC        | -0.967510496 | 2.69E-09   | 1.35E-07    |
| ENSG00000163235 | TGFA        | -1.105013717 | 0.00022307 | 0.001902786 |
| ENSG00000092969 | TGFB2       | 0.97234993   | 5.82E-06   | 9.32E-05    |
| ENSG00000163513 | TGFBR2      | -0.604627962 | 1.02E-14   | 2.63E-12    |
| ENSG00000069702 | TGFBR3      | -0.933468843 | 6.47E-14   | 1.32E-11    |
| ENSG00000129028 | THAP10      | 0.63737669   | 1.28E-06   | 2.59E-05    |
| ENSG00000186340 | THBS2       | 1.514420673  | 9.12E-12   | 1.05E-09    |
| ENSG00000113296 | THBS4       | 1.472559858  | 1.54E-10   | 1.11E-08    |
| ENSG00000154096 | THY1        | 1.640739483  | 2.50E-09   | 1.27E-07    |
| ENSG00000221995 | TIAF1       | 0.737730202  | 9.91E-06   | 0.000145522 |
| ENSG00000100234 | TIMP3       | -0.624727055 | 3.22E-05   | 0.000384673 |
| ENSG00000157150 | TIMP4       | -0.979718121 | 4.83E-06   | 8.01E-05    |
| ENSG00000007350 | TKTL1       | -0.862143954 | 8.18E-06   | 0.000124047 |
| ENSG00000095587 | TLL2        | 0.894704426  | 0.00013987 | 0.001289686 |
| ENSG00000137462 | TLR2        | -0.864208931 | 8.54E-05   | 0.000861523 |
| ENSG00000196664 | TLR7        | -0.633064146 | 0.00908312 | 0.036777052 |
| ENSG00000163762 | TM4SF18     | -0.601543378 | 0.00045661 | 0.003400366 |
| ENSG00000141524 | TMC6        | 0.631099637  | 0.00017272 | 0.001539859 |
| ENSG00000166292 | TMEM100     | -0.748136969 | 0.00045211 | 0.003380532 |
| ENSG00000144868 | TMEM108     | -0.734260409 | 0.00142964 | 0.008524718 |
| ENSG00000183160 | TMEM119     | 1.092345851  | 5.91E-05   | 0.000635986 |
| ENSG00000139364 | TMEM132B    | -1.594073238 | 2.60E-09   | 1.31E-07    |
| ENSG00000181234 | TMEM132C    | -0.980251124 | 7.32E-05   | 0.00075909  |
| ENSG00000178826 | TMEM139     | -0.990499773 | 5.48E-07   | 1.26E-05    |
| ENSG00000236144 | TMEM147-AS1 | 0.589100762  | 1.37E-08   | 5.40E-07    |
| ENSG00000261115 | TMEM178B    | -0.864884928 | 3.33E-07   | 8.21E-06    |
| ENSG00000187824 | TMEM220     | -0.830840826 | 7.50E-14   | 1.50E-11    |
| ENSG00000205084 | TMEM231     | 0.601178696  | 1.03E-08   | 4.25E-07    |
| ENSG00000224982 | TMEM233     | 1.7011006    | 1.53E-09   | 8.31E-08    |
| ENSG00000148483 | TMEM236     | -1.038480629 | 1.55E-08   | 6.02E-07    |
| ENSG00000182107 | TMEM30B     | 1.324157217  | 2.10E-06   | 3.92E-05    |
| ENSG00000095209 | TMEM38B     | -0.696299896 | 6.96E-12   | 8.16E-10    |
| ENSG00000164983 | TMEM65      | -0.814162639 | 1.23E-17   | 6.43E-15    |
| ENSG00000159596 | TMEM69      | -0.672585403 | 1.01E-12   | 1.44E-10    |
| ENSG00000165071 | TMEM71      | 0.599127791  | 0.00045275 | 0.003381183 |
| ENSG00000137103 | TMEM8B      | 0.609520304  | 1.73E-07   | 4.69E-06    |
| ENSG00000125827 | TMX4        | -0.661651398 | 1.99E-13   | 3.42E-11    |
| ENSG00000041982 | TNC         | 1.215360876  | 9.54E-06   | 0.000140439 |
| ENSG00000141655 | TNFRSF11A   | -0.828248568 | 7.96E-06   | 0.000121654 |
| ENSG00000164761 | TNFRSF11B   | 1.130175837  | 4.44E-07   | 1.06E-05    |
| ENSG00000215788 | TNFRSF25    | 0.904391921  | 1.65E-11   | 1.76E-09    |

|                 |            |              |            |             |
|-----------------|------------|--------------|------------|-------------|
| ENSG00000186827 | TNFRSF4    | 1.191684468  | 9.04E-06   | 0.000134526 |
| ENSG00000105048 | TNNT1      | 0.834178773  | 2.37E-06   | 4.33E-05    |
| ENSG00000182095 | TNRC18     | 0.637485445  | 5.11E-05   | 0.000564219 |
| ENSG00000204282 | TNRC6C-AS1 | 0.86449752   | 3.62E-05   | 0.000425391 |
| ENSG00000168477 | TNXB       | 0.805575743  | 8.85E-06   | 0.000132385 |
| ENSG00000160949 | TONSL      | 0.642241283  | 0.00037618 | 0.002906    |
| ENSG00000115129 | TP53I3     | 0.71191737   | 2.27E-05   | 0.00028947  |
| ENSG00000078804 | TP53INP2   | 0.875237041  | 7.61E-06   | 0.000116814 |
| ENSG00000162341 | TPCN2      | 0.618808761  | 6.41E-07   | 1.44E-05    |
| ENSG00000111907 | TPD52L1    | 0.788782349  | 3.35E-09   | 1.64E-07    |
| ENSG00000141933 | TPGS1      | 0.766962193  | 5.37E-05   | 0.000587736 |
| ENSG00000144034 | TPRKB      | -0.817974167 | 5.83E-13   | 8.65E-11    |
| ENSG00000128294 | TPST2      | -0.702159928 | 4.61E-11   | 4.11E-09    |
| ENSG00000076604 | TRAF4      | 0.703770179  | 0.00057685 | 0.004101466 |
| ENSG00000072657 | TRHDE      | -1.613345054 | 5.49E-08   | 1.79E-06    |
| ENSG00000173334 | TRIB1      | 0.652407225  | 0.00021394 | 0.001843853 |
| ENSG00000255690 | TRIL       | 0.682698406  | 0.00032541 | 0.002578213 |
| ENSG00000146054 | TRIM7      | 0.888611157  | 8.27E-09   | 3.51E-07    |
| ENSG00000205133 | TRIQK      | -0.658477771 | 7.55E-08   | 2.33E-06    |
| ENSG00000137672 | TRPC6      | 0.875352192  | 4.85E-05   | 0.000538571 |
| ENSG00000196689 | TRPV1      | 0.851446512  | 2.10E-11   | 2.12E-09    |
| ENSG00000196428 | TSC22D2    | 0.586771927  | 1.09E-08   | 4.40E-07    |
| ENSG00000145777 | TSLP       | -1.023339489 | 1.68E-12   | 2.27E-10    |
| ENSG00000064201 | TSPAN32    | 0.718558392  | 2.11E-07   | 5.56E-06    |
| ENSG00000168785 | TSPAN5     | 0.736921643  | 0.00019748 | 0.001724254 |
| ENSG00000011105 | TSPAN9     | 0.881888526  | 3.80E-14   | 8.46E-12    |
| ENSG00000128311 | TST        | -0.675525875 | 0.00011152 | 0.001067932 |
| ENSG00000233864 | TTY15      | 0.656605717  | 0.01332541 | 0.049522878 |
| ENSG00000167553 | TUBA1C     | -0.630510818 | 0.00010562 | 0.001017626 |
| ENSG00000075886 | TUBA3D     | -2.21300499  | 2.82E-13   | 4.49E-11    |
| ENSG00000152086 | TUBA3E     | -2.388724218 | 1.99E-14   | 4.69E-12    |
| ENSG00000188229 | TUBB4B     | -0.78634873  | 1.67E-09   | 9.03E-08    |
| ENSG00000131462 | TUBG1      | -0.637648792 | 5.85E-08   | 1.88E-06    |
| ENSG00000074966 | TXK        | 0.622055174  | 0.00159389 | 0.009298918 |
| ENSG00000011600 | TYROBP     | -0.680687528 | 0.00755411 | 0.031775783 |
| ENSG00000230454 | U73166.2   | 0.686162471  | 3.09E-05   | 0.000372193 |
| ENSG00000108106 | UBE2S      | 0.637969513  | 0.00211899 | 0.011637404 |
| ENSG00000154277 | UCHL1      | 0.878291979  | 0.0003967  | 0.003029678 |
| ENSG00000143179 | UCK2       | 0.729781626  | 4.74E-10   | 3.00E-08    |
| ENSG00000177169 | ULK1       | 0.747792878  | 2.05E-07   | 5.44E-06    |
| ENSG00000107731 | UNC5B      | 0.882408629  | 6.50E-09   | 2.87E-07    |
| ENSG00000144406 | UNC80      | 2.313663941  | 9.41E-18   | 5.04E-15    |
| ENSG00000005007 | UPF1       | 0.663441442  | 2.27E-12   | 2.91E-10    |



|                 |              |              |            |             |
|-----------------|--------------|--------------|------------|-------------|
| ENSG00000183696 | UPP1         | 0.698533531  | 1.56E-14   | 3.84E-12    |
| ENSG00000142207 | URB1         | 0.599747036  | 1.19E-09   | 6.59E-08    |
| ENSG00000102226 | USP11        | 0.780224641  | 3.20E-20   | 3.47E-17    |
| ENSG00000136878 | USP20        | 0.634986405  | 1.76E-11   | 1.85E-09    |
| ENSG00000124422 | USP22        | 0.624218969  | 6.33E-18   | 3.64E-15    |
| ENSG00000163945 | UVSSA        | 0.653091094  | 6.76E-09   | 2.97E-07    |
| ENSG00000162738 | VANGL2       | -0.779187042 | 2.14E-06   | 3.98E-05    |
| ENSG00000071246 | VASH1        | 0.65701036   | 4.90E-07   | 1.15E-05    |
| ENSG00000143494 | VASH2        | -0.738513978 | 0.00244579 | 0.013081734 |
| ENSG00000150630 | VEGFC        | 0.599844201  | 0.00045716 | 0.003403352 |
| ENSG00000165197 | VEGFD        | -1.209172809 | 1.67E-07   | 4.54E-06    |
| ENSG00000205221 | VIT          | -1.209205044 | 1.47E-07   | 4.10E-06    |
| ENSG00000112303 | VNN2         | -0.753580609 | 0.00114741 | 0.007128744 |
| ENSG0000019102  | VSIG2        | 0.675225295  | 0.0001588  | 0.001434492 |
| ENSG00000155659 | VSIG4        | -1.593314028 | 1.43E-10   | 1.05E-08    |
| ENSG00000163032 | VSNL1        | 1.022202201  | 8.20E-14   | 1.59E-11    |
| ENSG00000132821 | VSTM2L       | -1.037027452 | 0.0002142  | 0.001844185 |
| ENSG00000109072 | VTN          | 0.720390517  | 2.74E-05   | 0.000335835 |
| ENSG00000179403 | VWA1         | 0.585259677  | 0.00091699 | 0.005955901 |
| ENSG00000204396 | VWA7         | 0.65585401   | 0.00020515 | 0.001778883 |
| ENSG00000239779 | WBP1         | 0.660763516  | 3.12E-06   | 5.50E-05    |
| ENSG00000174776 | WDR49        | -0.930802531 | 3.93E-06   | 6.73E-05    |
| ENSG00000075702 | WDR62        | -0.745968781 | 0.00065215 | 0.004520981 |
| ENSG00000158023 | WDR66        | 0.733835457  | 5.35E-05   | 0.000586332 |
| ENSG00000161996 | WDR90        | 0.703055922  | 2.08E-05   | 0.000268794 |
| ENSG00000215861 | WI2-1896O14. | 0.620518473  | 0.00512119 | 0.023422367 |
| ENSG00000064205 | WISP2        | -0.761979524 | 0.00090614 | 0.005898421 |
| ENSG00000196632 | WNK3         | -1.150860871 | 2.20E-09   | 1.15E-07    |
| ENSG00000114251 | WNT5A        | -0.839306374 | 2.89E-07   | 7.28E-06    |
| ENSG00000143816 | WNT9A        | 2.386811792  | 5.36E-20   | 5.45E-17    |
| ENSG00000142279 | WTIP         | 0.620294847  | 1.75E-06   | 3.35E-05    |
| ENSG00000206579 | XKR4         | -0.766180713 | 0.00592844 | 0.026317971 |
| ENSG00000143324 | XPR1         | 0.787677823  | 2.21E-09   | 1.15E-07    |
| ENSG00000126215 | XRCC3        | 0.637131935  | 9.15E-05   | 0.00090911  |
| ENSG00000152422 | XRCC4        | -0.795488469 | 8.33E-10   | 4.89E-08    |
| ENSG00000093100 | XXbac-B461K1 | 0.628029735  | 0.00245499 | 0.013119082 |
| ENSG00000175048 | ZDHHC14      | 0.743911555  | 1.12E-09   | 6.28E-08    |
| ENSG00000155256 | ZFYVE27      | 0.6171893    | 7.02E-10   | 4.24E-08    |
| ENSG00000158805 | ZNF276       | 0.613668199  | 4.50E-10   | 2.87E-08    |
| ENSG00000205903 | ZNF316       | 0.738648901  | 1.52E-07   | 4.23E-06    |
| ENSG00000138311 | ZNF365       | 1.340796032  | 1.21E-06   | 2.49E-05    |
| ENSG00000181444 | ZNF467       | 0.655158965  | 0.00150848 | 0.008904757 |
| ENSG00000225614 | ZNF469       | 0.979858532  | 4.19E-05   | 0.000480523 |

|                 |            |             |            |             |
|-----------------|------------|-------------|------------|-------------|
| ENSG00000197363 | ZNF517     | 0.67609261  | 2.05E-06   | 3.84E-05    |
| ENSG00000198597 | ZNF536     | 0.759400468 | 0.00016117 | 0.001453681 |
| ENSG00000168916 | ZNF608     | 0.655491974 | 3.24E-06   | 5.68E-05    |
| ENSG00000196109 | ZNF676     | 0.771245954 | 1.04E-08   | 4.27E-07    |
| ENSG00000267254 | ZNF790-AS1 | 0.67354693  | 2.34E-05   | 0.000296327 |
| ENSG00000213973 | ZNF99      | 0.760568493 | 0.00026409 | 0.002174794 |
| ENSG00000174276 | ZNHIT2     | 0.629721349 | 0.00098893 | 0.006339317 |
| ENSG00000121413 | ZSCAN18    | 0.700326835 | 9.50E-15   | 2.49E-12    |
| ENSG00000132003 | ZSWIM4     | 0.658417697 | 0.00024658 | 0.002059412 |



**Supplemental Table S4**

| Gene names     | Sequence window                        | FC           | p-value     |
|----------------|----------------------------------------|--------------|-------------|
| NRAP           | GVGMDRRTLHAMKVGSLASNVAYKADYKHDI        | -1.887794206 | 0.002274013 |
| TNS1           | ALPEKRMSVGDRAAGSLPNYATINGKVSSPV        | -2.247670462 | 0.006901013 |
| TNS1           | SLGRHLGGSGSVVPGSPCLDRHVAYGGYSTP        | 1.617300322  | 0.000521025 |
| TNS1           | MLDLEPASAAAPLHKSQSVPGAWPGASPLSS        | -2.326999423 | 0.002254274 |
| TNS1           | VSVDYNTSDPLIRWDSYDNFSGHRDDGMEEV        | 2.140347535  | 1.68E-05    |
| C10orf54       | QAASNRRRAQELVRMDSNIQGIENPGFEASPP       | -2.615814099 | 8.02E-07    |
| ADD1           | ___MNGDSRAAVVTSPPTTAPHKERYFDR          | 1.541756425  | 0.009549895 |
| ADD1;LA04NCO   | LLNPEKYKAKSRSPGSPVGEETGSPKQWQIG        | 4.97564703   | 9.03E-06    |
| CLASP1         | GTTTKAEGRIIRTRRQSSGSATNVASTPDNRG;PGSYA | -2.569656177 | 3.51E-09    |
| HIST1H1E       | _____MSETAPAAPAAPAPAEK                 | -3.28839855  | 3.31E-05    |
| PTPN12         | ESTIEQIDKKLERNLSFEIKKVPLQEGPKSF        | -2.60762991  | 0.000469018 |
| KIAA0415;FOXk  | GVSCFRTPFGPLSSRSAPASPTHGMLMSPRS        | -1.599872401 | 0.002973894 |
| KIAA0415;FOXk  | FRTPFGLSSRSAPASPTHGMLMSPRSGGLQ         | -1.724448756 | 0.003952206 |
| CAMK2B         | SPLPAPSPRISDILNSVRRGSGTPEAEGPLS        | 2.270656703  | 0.000523486 |
| CAMK2B         | EDEDAKAPRVPDILSSVRRGSGAPEAEGPLP        | 2.13350756   | 0.000937747 |
| XIRP2          | QFDESIHKFQIIRGISAQEIQTGNVKSAKWL        | -1.933719627 | 0.00069494  |
| APOL1          | ASASRPRVTEPISAESGEQVERVNEPSILEM        | 2.735150589  | 0.005335391 |
| tmp_locus_29;I | LSSPVFPRAGFGSKGSSSVTSRVYQVSRST         | -2.020189066 | 0.003820303 |
| tmp_locus_29;I | MRQMRELEDRFASEASGYQDNIARLEEEIRH        | 2.083870719  | 0.00025821  |
| CEP170         | PTRTSLRRARLGEASDSELADADKASVASE         | 2.143399596  | 0.000973711 |
|                | EPVGMETGLGQAPGRSAVLSASEHKRSGAA_        | -6.750950586 | 0.000279148 |
| SPTAN1;DKFZp   | VATFNSIKELNERWRSLQQLAEERSQLLGSA        | -2.425573594 | 0.003859032 |
| MYOM3          | VLVRDAEENPGAGSPLNVRCLDVNRDCLI          | -2.056708278 | 0.002898414 |
| MYOM3          | CTYKEDEGLYMVRVPSFGPREQSTYVLVRD         | 2.105655813  | 3.33E-17    |
| TP53BP1        | GDCKLMLSTSEYSQSPKMESLSSHRIDEDG         | 1.724605372  | 0.000357261 |
| TP53BP1        | LTVECKTSEIEPKNSPEDLGLSLTGDSCKL         | 1.766746696  | 0.000285398 |
| PRKAR1A;PRKA   | LQKAGTRTDSREDEISPPPPNPVVKGRRRRG        | 1.873749103  | 2.31E-05    |
| ATG9A          | QAQAEPERHVWHRRESDESSESAPDEGGEGA        | -2.79996149  | 3.63E-07    |
| FILIP1         | GEAAEEETPAVFIKRSFQENHIMSNLRQVG         | -2.382178335 | 1.94E-08    |
| ACTA2;ACTC1;A  | VGMGQKDSYVGDQAQSKRGILTKYPIEHGI         | -7.112553768 | 6.95E-09    |
| ACTA2;ACTC1;A  | GIADRMQKEITALAPSTMKIKIAPPERKYS;GIADRM  | -3.073305014 | 0.000973868 |
| MYBPC3         | APARPAPDAPEDTGDSDEWVFDKLLCETEG         | -2.683191832 | 0.003175127 |
|                | SAFRRTSLAGGRRISDSHEDTGILNFSSLL         | -3.073203916 | 0.002889164 |
| GYS1           | AAQGYRYPRPASVPPSPSLSRHSSPHQSEDE        | 3.242273598  | 0.001316447 |
| PRKAR2A        | EDLEVPVPSRFNRRVSVCAETYNPDEEEEDT        | -1.724391818 | 5.71E-07    |
| MLLT4          | LPGDDRLMKNRADHRSSPNVANQPSPGGKS         | -1.735480141 | 0.001095593 |
| SYNRG          | NSTAASKYDVFRQLSLEGSGLGVEDLKDNT         | -1.532132676 | 0.004189432 |
| MYOM1          | DSEAIEVKAAIGGGVSPDVCALSDEPGGLT         | 3.35672244   | 5.39E-06    |
| MYOM1          | SSAAHRRESEAFRRASASSSQQASQHALSS         | -3.868091003 | 4.83E-06    |
| BCKDK          | PLRPLLGPALALRARSTSATDTHHVEMARER        | -2.96011804  | 6.49E-05    |
| TJP1;DKFZp686  | WRFRLRSSKRNLKRSREDLAQPVQTKFPA          | 1.635955962  | 3.95E-07    |
| SRRM1          | RLSPSASPPRRRHRPSPATPPPKTRHSPTP         | -2.399341606 | 0.000838982 |
| DKFZp781D221   | NNFPKNQTPVRMRRNSFTLSSSNTIRRPRN         | -2.467061138 | 6.74E-11    |
| NEBL           | KKDLENEIKGKGMQVSMIPDILRAKRTSEI         | -3.353369668 | 1.24E-05    |
| NEBL           | TVKYTQDQHKQMKGRPSLILDTPAMRHVKEAQ       | -6.288776043 | 3.36E-11    |
| NEBL           | EKVYKEDFEKEIKGRSSLDLTKTPEFLHVKY        | -2.864504562 | 0.00079528  |

|              |                                          |              |             |
|--------------|------------------------------------------|--------------|-------------|
| NEBL         | QGYGYMHQTSVSSMRSMQHSPNLRTRYAMYD          | -1.763767281 | 0.004969043 |
| ATP1A2;ATP1A | DIRILAAQGCKVDNSSLTGESEPQTRSPECT;DLRIISAF | -2.669089458 | 0.002857657 |
| TGOLN2       | SHPEPQTPKDSPSKSSAEQTPEDTPNKSGA           | 1.50982815   | 0.008443804 |
| CDC42EP4     | TEEAVPRRNGAAGPHSPDLLDEQAFGLDLD           | 2.760274739  | 2.92E-05    |
| SSR1         | MSWIPQETLNQINKASPRRLPRKRAQKRSVG          | -1.789590437 | 0.003578436 |
| NCK1         | NLKDTLIGIKVKRKPSVPDSASPADDSDVDP          | -2.087422378 | 8.74E-05    |
| HARS2        | KPNFIIKTPKGTDLSPQHMMVVREKILDVLI          | 1.979497727  | 0.000225321 |
| CSDC2        | SRVWERGGVPPRDLPSPLPTKRTRTYSATAR          | -1.721080603 | 2.22E-05    |
| CSDC2        | MTSESTSPVVPPLHSPKSPVWPTFPFHREG           | -2.051237625 | 0.000341946 |
| MYOZ2        | SQQAPLTPPNTDPSPNPNDIAPGYSGPL             | 1.792079012  | 6.85E-07    |
| SLC9A1       | AHKLDSPTMSRARIGSDPLAYEPKEDLPVIT          | 3.14074322   | 3.33E-05    |
| UGP2         | ____MSRFVQDLKAMSQDGASQFQEVIRQEL          | 2.139590372  | 0.000102175 |
| CCNY;CCNYL1  | NPSDHPRASTIFLSKQTDVREKRKSLFINH;NPSDHPF   | -2.438714694 | 3.33E-06    |
| ANKRD2       | AALQKVKGQERVRKTSLDLRREIDVGGIQN           | -14.04320325 | 8.11E-06    |
| CAST         | TAISGKPGDKKKEKSLTAPVPEVKPDKPS;TAISGKP    | -2.785638456 | 9.47E-05    |
| SPTBN1       | KGEQVSQNGLPAEQGSPRMAETVDTSEMVNG          | 1.76493394   | 0.000393727 |
| PPP1R13B     | RRKLANAPRPLKKRSSITEPEGGPNIQKL            | -1.833999799 | 0.000164457 |
| SORBS2       | PRSGAPTPSSRAPALSPTRPPKKPLDYVQDH          | 2.257792723  | 2.55E-17    |
| SORBS2       | SKSHSDNSPNAFKDASSPVPVPPVPPVPL            | 2.704780552  | 0.003145956 |
| SORBS2       | SPPSRAKDRESRYSSTLTDMGRSAPRERR;SSPSRAI    | -1.935095643 | 0.005601414 |
| SORBS2       | GRKPLSSSRLGEVTGSPSPPPRSGAPTSSR           | 2.114388187  | 0.000321541 |
| SORBS2       | KPLSSSRLGEVTGSPSPPPRSGAPTSSRAP           | 1.970543068  | 0.000108387 |
| CCNL2        | LLPGGTQVLDGTSGFSPAPKLAWSAVALSGI          | -2.184850749 | 8.19E-06    |
| PCDH1        | YQDRGGQEPAGAGSPSPEDRNTKTAPVRL            | 1.781880781  | 0.00456674  |
| PCDH1        | GDSPRIHLPLNYPPGSPDLGRHYRSNSPLPS          | 1.689960277  | 0.00191093  |
| SMTN         | SSKKMGSIFDREDQASPRAGSLAALEKQAE           | -1.946699936 | 0.000618704 |
| NAGLT1       | PTFQDLATNVNRNIISSLSFIFVGRALGYLSG         | -3.994814283 | 9.94E-07    |
| NAGLT1       | FQDLATNVNRNIISSLSFIFVGRALGYLSGSV         | -3.766609813 | 3.88E-06    |
| ABLIM1       | LPDGHMPAMRMDRGVSMPNMLEPKIFPYEML          | -2.18105085  | 0.000190478 |
| ABLIM1       | GPPSFAVVGPDMKRRSSGREEDDEELLRRRQ          | -4.793011307 | 1.99E-09    |
| ABLIM1       | PPSFAVVGPDMKRRSSGREEDDEELLRRRQL          | -3.013477475 | 0.00726124  |
| AARSD1;PTGES | NEKIRDRLPVNVRELSLDDPEVEQVSGRGLP          | -1.859244584 | 0.000834635 |
| TJAP1        | PQPNGECHSLGTARGSPPEELPLPAFEKLN           | 2.734875394  | 0.001251642 |
| ABLIM1       | GRDCLCQLCAQPMSSSPKETTSSNCAGCGR           | 1.783982414  | 2.02E-05    |
| PXN          | GERCWAAGWPRDGGRSSPGGQDEGGFMAQGK          | 1.891015895  | 2.80E-05    |
| PXN          | ERCWAAGWPRDGGRSSPGGQDEGGFMAQGKT          | 1.884624456  | 3.40E-05    |
| FAM122A      | ASPKRIDFIPVSPAPSPTRGIGKQCFSPSLQ          | -2.207418901 | 0.000805173 |
| DBNL         | AVHPREIFKQKERAMSTTSISSPQPGKLRSP          | 3.749911862  | 1.31E-05    |
| GORASP2      | SEKPVSAAVDANASESP_____                   | 1.5170002    | 0.005426058 |
| SMARCC2      | REEEQEDLTKDMDEPSPVPNVVEVTLPKTVN          | 2.433430388  | 2.44E-06    |
| HNRPK;HNRNPI | QGGSGYDYSYAGGRGSYGLDGGPIITQVTI           | -2.095566423 | 2.22E-05    |
| PGM1         | IIRKIKAIIGGIILTASHNPGGPNDFGIKFN          | -3.723439494 | 1.77E-05    |
| CANX         | EDRKPKAEDEILNRSPNRKPRRE_____             | 1.536340925  | 0.003228217 |
|              | _____MSRDISPEEIDLKNEPWYKFF               | 2.604205146  | 2.34E-08    |
| PLEKHA5      | REKKKGLNVIGASDQSPLOSPSNLRDNPFR           | -1.532068683 | 0.000153704 |
| GJA1         | GDRNNSSCRNYNKQASEQNWANYSAEQNRMG          | -2.368491957 | 0.001615528 |
| SYNPO2L      | DEPIWRTELASAPVPSAPPPEAPRGLGASP           | 3.107906143  | 1.05E-13    |

|              |                                        |              |             |
|--------------|----------------------------------------|--------------|-------------|
| SYNPO2L      | GRGVQLFEQQRQRADSSTQELARVEPAAMLN        | -3.420818797 | 2.48E-08    |
| SYNPO2L      | MELARAGSRASEGQGSGLGGQLSEVSGRGVQ        | 1.757640779  | 8.08E-07    |
| SYNPO2L      | PRAQSAPPEAAVLPPSPLPAPVASPRPFQPG        | 3.869223148  | 1.29E-09    |
| SYNPO2L      | EAAVLPPSPLPAPVASPRPFQGGGAPTAP          | 2.979803984  | 0.001487693 |
| SYNPO2L      | PPSRGLLDGLVNGAASSAGIPEPPRLQGRGG        | 3.084634769  | 7.59E-05    |
| SYNPO2L      | PSRGLLDGLVNGAASSAGIPEPPRLQGRGGE        | 2.155800461  | 0.00934987  |
| SYNPO2L      | ARVEPAAMLNGEGLQSPRAQSAPPEAAVL          | 2.97283805   | 3.25E-14    |
| VDAC2        | YQLDPTASISAKVNNSSLIGVGYTQLRPGV         | -2.010372776 | 6.97E-06    |
| SLC16A1      | IDVAGKPNEVTKAAESPDQKDTDGGPKKEES        | -2.547996904 | 6.99E-05    |
| SLC16A1      | SPDQKDTDGGPKKEESPV                     | -3.607043467 | 4.46E-05    |
| CTNNB1       | HQLSKKEASRHAIMRSPQMVAIVRTMQNTN         | 1.923967369  | 1.67E-05    |
| CTNNB1       | FRMSEDKPQDYKKRLSVELTSSLRTEPMAW         | -3.423274547 | 7.42E-05    |
| CTNNB1       | VQLLVRAHQDTQRRTSMGGTQQQFVEGVRME        | -2.117092065 | 9.99E-05    |
| SKIV2L;SKI2W | TVSASPCSAPLARASSLEDLVLKEASTAVST        | 1.73825215   | 0.001002715 |
| MAP4         | VAPSTVKEVGLLKDMSPLSETEMALGKDVT         | 2.436056926  | 0.004594481 |
| MAP4         | ISSTEISSAEKVALSSETEVALARDMTLPE         | 2.285391618  | 6.57E-07    |
| DKFZp564A228 | DDIYKTHLENNRFGGSGSQVDSARMNLASSF        | 2.333962033  | 4.92E-12    |
| PPP1R12C     | ERRTAEGAPGAGLQRSASSSWLEGTSTQAKE        | -2.686280535 | 3.96E-05    |
| PKM          | MADTFLEHMCRLDIDSPITARNTGIICTIG         | 2.529771914  | 0.006742413 |
| ABC1         | PKPAKPEKNRINKAVSEEQQPALKGKKGKEE        | 3.019991022  | 0.000448699 |
| HNRNPA1;HNR  | _____MSKSESPKEPEQLRKLFIG               | -2.055147218 | 2.19E-07    |
| DKFZp586F042 | ARIAATTGNGQPRRRSIQDLTVTGTEPGQVS        | 2.607996883  | 7.41E-07    |
| LMOD2        | _____MSTFGYRRGLSKYESIDEDELLASLSAEEL    | 2.45233936   | 9.88E-05    |
| LMOD2        | TKVWQRGTPSSSPYVSPRHSPWSSPKLPKKV        | 4.528752813  | 0.001721675 |
| DPF2         | PLEKRGAPDRVDDDSLGEFPVNSRARKRI          | -1.571562546 | 0.007506526 |
| LSM14A       | TASAHLPAPAAVGRRSPVSTRPLPSASQKAG        | 1.824916672  | 6.54E-08    |
| MYLK;DKFZp68 | LSSMAMISGLSRKSSTGSPTSPLNAEKLES         | 1.834715488  | 0.001162254 |
| PACSIN3      | FHELHRDLHQGIEAASDEEDLRWWRSTHGPG        | 2.65753852   | 3.52E-06    |
| EIF3J        | _____MAAAAAAGDSDSWDADAFSVEDPVR         | -2.22105828  | 0.001032398 |
| ENO3;ENO2;EN | FTSKGLFRAAVPSGASTGIYEALERDNDKT;HTAKGRI | -2.615518715 | 4.07E-05    |
| EIF3C;EIF3CL | TKPVGGNYGKQPLLLSEDEEDTKRVVRSKD         | 2.299360573  | 0.000245661 |
| SORBS3       | EPRLRLCDDGPQLPTSPRLTAAARSARHPSS        | 2.107717503  | 0.003032617 |
| EVL          | _____MKPAGSVNDMALDAFDLDRMK;EKPV        | -1.732345725 | 0.004093077 |
| PLEKHF1      | AAQQRQEAEQAGAGSPGQPAHLARPICGAS         | 1.723710414  | 0.004347076 |
| SH3RF2       | NGIEKQVKTFRFQNYSPPTKHYTSHPTSGK         | -2.063441779 | 8.18E-08    |
| ACTN3;ACTN1; | GMIWTIILRFAIQDISVEETSAKEGLLLWCQ        | 5.094270295  | 1.35E-13    |
| SIPA1        | PHTFEPVRGPELLRSGSDAGEARPPTPASP         | -1.533822255 | 0.000363571 |
| SIPA1        | TFEPRPVRGPELLRSGSDAGEARPPTPASPRA       | -1.557807137 | 0.000371977 |
| CTNNA1       | QLPQEQKAKIAEQVASFQEEKSKLDAEVSKW        | 2.569618224  | 2.76E-07    |
| AKAP2        | GPPEDSGASAAKGQKSPGALETSAAGSQGN         | 1.903268093  | 0.00021993  |
| PLXDC2       | ERRPSRWPAMKFRRGSGHPAYAEVEPVGEKE        | 3.005643347  | 0.000905278 |
| HRC          | HRHQGHRDEEDEDVSTERWHQGPQHVVHGL         | -2.743751124 | 0.003271004 |
| CAMK2D       | LKGAILTTMLATRNFSAAKSLKKPDGVKIN         | 1.894498908  | 0.001229792 |
| LIMCH1       | ATVETTIARASVLDTSMSAGSGSPKTVTPK         | 2.549588529  | 0.000373622 |
| DKFZp686G032 | ERSDSLSPRHRGDDSFDSLDFGSRSRQTP          | 1.75802876   | 0.00127332  |
| LIMCH1       | TLPLDKSINHQIESPERRKKSREHFQAGP          | 1.649753379  | 0.001470249 |
| LIMCH1       | GKVELVLSQKVVKPKSPEPEATLTFPFLDKM        | 2.786297496  | 1.23E-05    |

|               |                                  |              |             |
|---------------|----------------------------------|--------------|-------------|
| ALDOC         | LRIVAPGKGILAADES VGSMARLSQIGVEN  | -1.912052589 | 0.009981084 |
| RRAS2         | LVRVIRKFQEQECPSPETRKEKDKKGCHC    | 1.630850935  | 1.20E-05    |
| PPHLN1        | RERSPYKRDNTFFRESPVGRKDSPHSRSGSS  | -2.076561083 | 0.00324148  |
| CRIP2         | ARAEERKASGPPKGPSRASSVTTFTGEPNTC  | -2.450835621 | 3.04E-06    |
| ARHGEF7       | TMKKLLPKRKPERSDEEFASRKSTAALEE    | -2.315734408 | 0.003493969 |
| SORBS1        | AVTLRASSYRETPSSSPASPQETRQHESKP   | -2.647234044 | 0.000866269 |
| SORBS1        | AIEKRAKDDSRVVKSTQDLSVSMDEVGIP    | -1.774012987 | 0.000533736 |
| CAMSAP1       | ERGEGRPRSIVSRPSEGPQLVRRKMTGSR    | -4.289440639 | 7.19E-10    |
| SUMO1         | _____MSDQEAKPSTEDLGDKK           | 1.809398824  | 1.28E-05    |
| SYNPO2        | AKPFPGSVNQPATPFSPTRNMTSPIADFPAP  | 1.546277772  | 0.001690643 |
| SYNPO2        | IIQISSGRELRVIQESEAGDAGLPRVEILD   | 2.073661816  | 3.28E-05    |
| ARVCF         | GFPEGPEPRDPSYGSLSRGLGMRPPRAGPL   | 2.022743896  | 0.002153086 |
| PDLIM4        | AQAHRIHIDPEIQDGSPTTSRRPSGTGTGPE  | 2.74349522   | 0.002924027 |
| SYNM          | VAENIVTSILKQFTQSPETEASADSFDPDKV  | 3.330860795  | 0.004326357 |
| SYNM          | VVRESLSRQRSPAGSPDEEGGAEAPAAGIR   | 1.669380683  | 1.96E-07    |
| APEH          | KAESFFQTKALDVSASDDEIARLKKPDQAIK  | -2.028675544 | 0.000127237 |
| SORBS2        | SGGAVSPMSYYQRPFSPSAY_____        | 2.564769858  | 0.000789266 |
| TNS2;TENC1    | QERSPGGHSDGASPRSPVPTTLPLGRHAPWQ  | 3.155856114  | 2.09E-11    |
| MYH11         | SRRSGGRRVIENADGSEETDTRDADFNGTK   | 1.734127143  | 0.001722437 |
| TTN           | LDARLHGDLVTIRAGSDLVLDAVGGKPEPK   | -1.537543252 | 0.004506025 |
| TTN           | PKRVKSPEPSHPKAVSPTETKPTTEKVQHL   | -9.956217769 | 0.000448459 |
| TTN           | ARVTEKAVTSPRVKSPEPRVKSPEAVKSPK   | -3.470365846 | 1.09E-06    |
| TTN           | VVTEEKITIVTQREESPPPAVPEIPKKKVPPE | 1.840365602  | 6.16E-05    |
| TTN           | EGILMPEEPETQAVLSDTEKIFPSAMSIEQI  | 1.685798841  | 0.002765198 |
| TTN           | VQEEEPFVPLTQRLSIDNSKKGESQLRVRD   | -2.522150261 | 0.001400887 |
| TTN           | QAVLSDTEKIFPSAMSIEQINSLTVEPLKTL  | 2.292339635  | 0.000666078 |
| TTN           | LSPSMEAPKIFERIQSQTVGQGSDAHFRVRV  | -1.52777557  | 0.004985658 |
| TTN           | GSKITGYVIEAQRKGSQWTHITTVKGLECV   | -1.867812538 | 0.008137272 |
| TTN           | TPSPIEAERRLRPGSGGKPPDEAPFTYQL    | -2.552796387 | 1.03E-05    |
| TTN           | VPEKKVPEAIPKPEPPPEVPEVLPKPEVV    | 1.628443075  | 0.006669667 |
| TTN           | EKEFEELVFSFIQRLSQTEPVTLIKDIENQT  | -5.560657906 | 8.61E-09    |
| TTN           | SPARMSPARMSPARMSPGRRLEETDESQLER  | -2.895358158 | 4.85E-05    |
| TTN           | PEVPPPWKQEGYVASSSEAEMRETTLTSTQ   | 2.11812384   | 0.001081135 |
| TTN           | QDDLEIVRPARRRTPSPDYDFYRPRRRSLG   | 2.276382694  | 3.20E-05    |
| TTN           | QTRIEKKIEAHFDARSATVEMVIDGAAGQQ   | -1.736696657 | 0.007674023 |
| TTN           | PVSRIRLSRSPRSRSPIRMSPARMSPARMS   | 2.558521624  | 0.009900996 |
| ARHGEF2       | AEAPWARRPVDPRRRSLPAGDALYLSFNPPQ  | -1.594056173 | 0.009160486 |
| NES           | ESLTALEKENQEPLRSPEVGDEEALRPLTKE  | 1.997591859  | 0.00913311  |
| NES           | ETLRTLEKETQRRRSLGEQDQMTLRPPEKV   | 3.039202759  | 9.85E-09    |
| PDLIM5        | DNTKKAKEKIPLHVFSKYTKLRDWHHEVSA   | -1.794312338 | 0.000544652 |
| PDLIM5        | ATLSKVATTYSSLSSTGNVEDSFEGFRNFS   | 2.119865642  | 0.003770119 |
| MYH6;MYH7;M   | TEAKAELQRVLSKANSEVAQWRKYETDAIQ   | -3.711926684 | 0.001020068 |
| MYH6;MYH7     | LEEISERLEEAGGATSVQIEMNKKREAEFQK  | 2.828311219  | 0.002974845 |
| HBB           | GRLLVVYPWTQRFESFGDLSTPDAVMGNPK   | 2.575672805  | 0.00074117  |
| TPM1          | DRKYEEVARKLVIIESDLERAERAELSEGK   | 1.779715347  | 0.000220357 |
| DKFZp434I243E | GSSAEQLGGRLRKLKSLGQYDNDAGGLPFS   | -1.677919714 | 0.005660274 |
| CAST          | _____MSQPGQKPAASPRPRRAAAARRTHEH  | -3.966781938 | 6.83E-05    |

|               |                                 |              |             |
|---------------|---------------------------------|--------------|-------------|
| MAP4          | KGSDSLNKKVDLTLSPKSENDKLKEISLAC  | 2.470262797  | 6.66E-08    |
| MAP4          | PSKRSNDGKSKKVKNSPEKHILENKIDATK  | 2.531841922  | 0.000524293 |
| MAP4          | VSGSSSCGGPGNQKRSIHVDSLEPQRDLGRE | -4.844351001 | 4.02E-17    |
| MAP4          | PQPAPHLKTPVDKSQSVGPLNLKGPLAEVSA | 1.787628958  | 0.003523658 |
| PROB1         | LALAGRTAPAQPRAASAPPTDRSPQSPSQGA | -3.414155347 | 1.57E-06    |
| PROB1         | APAQPRAASAPPTDRSPQSPSQGARRQPGAA | -2.894206975 | 9.14E-05    |
| PROB1         | PRQTPNGAVRGPSPQNLSPWDRTRRRVS    | -2.395192368 | 0.002871409 |
| PROB1         | QAAAGFVQTALARKLSPEAPAPSSATFGSTG | -1.642353484 | 1.33E-05    |
| PROB1         | RAAGAPRPRLLLRTGSLDESLGPLQAAAGFV | -5.708629553 | 0.000100301 |
| MAST4         | APKLGGRYRSGRRKSAGNIPLSPLARTPSP  | -3.145637601 | 1.76E-06    |
| NACA          | SLSFQGSKDSPATTHSPTPPSPKGAPTPSAV | -1.655194912 | 0.00874561  |
| KIF13A        | QSIPEKNSKSLCRTGSCSELDACPSKISQPA | 1.625205977  | 0.001150555 |
| LRBA          | _____MASEDNRVSPPTGDDGGGGGREE    | 1.782701723  | 2.82E-06    |
| MAP1A         | VTKAPSLDSSLPQLPSPSSPGAPLLSNLPRP | 2.970719462  | 6.60E-05    |
| MAP1A         | EEGTLEKEEKVPPRSPQAQAEVNIIDEGLT  | 1.799631225  | 0.000695595 |
| CALD1         | DKEKEEEEEKPKRGSIGENQIKDEKIKKDK  | 1.906566421  | 1.22E-05    |
| LMO7          | TSGLDLMSESGEISQREVSRSQDQFSDM    | 2.491408779  | 1.48E-05    |
| LMO7          | QKEVAATEEDVTRLPSPTSPFSSLSQDQAAT | 1.866811215  | 0.001495648 |
| LMO7          | TTGVATTQSPTPRSHSPSASQSGSQRNRSV  | -2.878493415 | 0.00073372  |
| C11orf58;SMAF | SAARESHPHGVKRSASPDDDLGSSNWEAADL | -2.09220843  | 0.002679387 |
| TPD52L1       | ISKKFGDMRNSPTFKSFEERVETTVTSLKTK | 2.220016228  | 0.000247672 |
| TPD52L1;hD53  | TSLKTKVGGTNPNGGSFEEVLSSTAHASAQS | 1.688136333  | 0.009969764 |
| CRYAB         | LSPFYLRPPSFLRAPSWFDTGLSEMRLEKDR | -2.676194485 | 3.78E-06    |
| CADPS         | GGLQPSSRAGGRPSSPSPVSEKEKEELE    | 1.724771629  | 0.004132127 |
| MYPN          | TFSIPSGNQFQPRCVSIPVSPTRSRIQNPVA | 2.33151114   | 0.001790565 |
| PCDH7         | SPSMGRYRSVNGGPGSPDLARHYKSSSPLPT | 2.272497788  | 7.06E-05    |
| MYO18B;DKFz   | LAVQRKSTERLEPASSPLASRSTNTSPLSRE | 1.672451358  | 9.21E-05    |
| LDB3          | ASPGTPGTPELRPTFSPAFSRPSAFSSLAEA | 2.898112544  | 0.000187687 |
| LDB3          | PVIPHQKDPALDTNGSLVAPSPPEARASPG  | 3.141328956  | 0.004863031 |
| LDB3          | QKDPALDTNGSLVAPSPPEARASPGTGP    | 2.486355607  | 0.000207191 |
| LDB3          | DPALDTNGSLVAPSPPEARASPGTGPTEL   | 3.148757729  | 2.55E-09    |
| PARVA         | _____MATSPQKSPSPKSPKSPSRKK      | 2.931747629  | 0.005243216 |
| CLASP2        | RLSSSVSAMRVLNTGSDVEEAVADALKKPAR | 1.995658054  | 0.008130895 |
| CLIP1         | SATPPISNLTKTASESISNLSEAGSIKKGER | -1.810859878 | 0.000443423 |
| RPTOR         | QRVLDTSSTLQSAPASPTNKGVHIHQAGGSP | 1.899025803  | 7.58E-07    |
| CNOT4         | SNPVIPISSNHSARSPFEGAVTESQSLFSD  | 2.263843499  | 9.33E-08    |
| UBE4B         | SNSLETQSQSLRSQSMIDIGVSCSMSQV    | 1.570463623  | 0.002115603 |
| ACSS2         | RGQEEAGAGGRARSWSPPEVSRSAHVPSLQ  | -2.867854709 | 0.000558881 |
| CEP170        | RGGHGVPHGKLLKQKSEEPSVIPFLQTALL  | 2.01776075   | 0.001099639 |
| SIK3;KIAA0999 | TLQLLNGMGPLGRRASDGGANIQLHAQQLLK | -2.364256869 | 0.000463086 |
| LMO7          | _____XDVTRLPSPTSPFSSLSQDQAAT    | 1.82336661   | 0.000692605 |
| KLC1;KNS2     | SRESEPKNPGMKRASSLNLVVGKAAEDRF   | -1.501725338 | 0.000186993 |
| RYR2          | REGDSMALYNRTRRISQTSQVSVDAAHGYSP | -1.935412025 | 0.000994116 |
| RYR2          | DSMALYNRTRRISQTSQVSVDAAHGYSPRAI | 3.855062303  | 5.25E-08    |
| PPP1R1A       | EDRIPNPHLKSTLAMSPRQRKKMTRITPTMK | -5.545933387 | 2.97E-06    |
| CARHSP1       | SSEPPPPQPPTHQASVGLLDTPRSRRERSPS | -1.696756519 | 0.006803536 |
| CARHSP1       | NVVPSPLPTRRTRTFSATVRASQGPVYKVC  | 2.799211258  | 0.00476465  |



|                |                                        |              |             |
|----------------|----------------------------------------|--------------|-------------|
| OBSCN          | CELSRAGASVEWRKGSLLQFPCAQYQMVQDG        | 1.868041147  | 0.007142253 |
| OBSCN          | IEEGTERRLTVRNVSADDDAVYICETPEGS         | 1.52328187   | 0.002335192 |
| ZFYVE19        | QDPERVTLQDYRLPDSDDDEDEETAIQRLVQ        | -1.68221302  | 0.00622022  |
| STARD13        | HIPKDHKPGTFPKALSIESLPTDSSNGVNW         | -2.341938642 | 3.56E-06    |
| SRCIN1         | AELPLGFSRMNRFRQSLPLRSASQTKLRSP         | 2.483123288  | 6.21E-09    |
| PRKCA          | KTKTIRSTLNPQWNESTFKLKPDKDRRLS          | -1.580451788 | 0.004471422 |
| FXYD1          | QRTGEPDEEEGTFRSSIRRLSTRRR_____         | -2.470978803 | 0.00425237  |
| COPE           | ____MAPPAPGPASGGSGEDELFDVKNAFYI        | 2.186078091  | 3.17E-05    |
| BIN1           | AQPSDNAPAKGNKSPSPDGDSPAATPEIRVN        | 1.793925675  | 0.002674009 |
| HSPB6          | MEIPVPVQPSWLRRASAPLPLGLSAPGRFLDQ       | -2.288014352 | 1.45E-05    |
| SCAMP3         | LDNPFQDPAVIQHRPSRQYATLDVYNPFETR        | -6.075863112 | 2.31E-10    |
| STX7           | REKEFVARVRASSRVSGSPEDSSKERNLVS         | 2.129940887  | 5.32E-06    |
| TGFB111        | SGDKDHLYSTVCKPRSPKPAAPAAPPFSSSS        | 2.638510953  | 6.74E-05    |
| PPP1R12B       | VPATEAGEGQQPWGRSLDEEPICHRLRCPAQ        | 2.355001054  | 9.54E-05    |
| DKC1           | AKAGLESGAEPGDGSDTTKKKKKKKKAKEV         | -1.878277828 | 0.000650934 |
| COBL           | MHSRSLTLGPSLSLGSISGVSVKSEMKKRRA        | 1.977451773  | 0.000606566 |
| DNAJB6         | GVQREAAVEQAQSETSLGARGQRGHK_____        | 1.534126018  | 3.13E-05    |
| SEC22B         | TKKLYIDSCARRNLGSINTELQDVQRIMVAN        | -2.880183174 | 9.07E-06    |
| SORBS2         | RVSQITVNGNSGGAVSPMSYYQRPFSAYS          | 2.440695432  | 0.000710522 |
| SORBS2         | _____MNTGRDSQSPDSAKGFRSVRPNLQ          | -2.78009975  | 0.002394763 |
| ABLIM3         | WTYHGSPKVPRARRFSSGGEEDDFDRSMHKL        | -1.509410074 | 7.88E-06    |
| STBD1          | DRVDHEEWEMVPRHSSWGDVGVGSLKAPVL         | -5.003662956 | 0.000219059 |
| STBD1          | DLGKLQAASWRLQNPSREVCDNSREHVPSGQ        | 2.470124492  | 1.17E-06    |
| TACC2          | PKMKKTPEKLDNTPASPPRSPAEPNDIPIAK        | 2.448557864  | 1.35E-07    |
| SVIL;DKFZp586  | VTLAGLASKENFSNVSLRSVNLTEQNSNSA         | 2.277428095  | 2.19E-17    |
| SVIL           | GHNREASKKRKVRTRSLSDFTGPPQLQALKY        | 1.616377529  | 0.001629224 |
| SVIL           | PKHAHSSSLQQAASRSPSFGDPQLSPEARPR;PKHAH! | 3.334599303  | 0.000224983 |
| SVIL           | QQAASRSPSFGDPQLSPEARPRCTSHSETPT;QQAASI | 2.844606238  | 0.000152644 |
| AIFM1          | VRREGVKVMPNAIVQSVGVSSGKLLIKLDG         | -2.818968382 | 0.000351493 |
| MB             | GAMNKALELFRKDMASNYKELGFQG_____         | -3.650185248 | 7.84E-11    |
| ALDOA          | VAPGKGILAADESTGSIKRLQSIGTENTEE         | -1.692711929 | 4.69E-05    |
| HSPB1          | IESPAVAAPAYSRALSRQLSSGVSEIRHTAD        | -15.40801477 | 8.69E-08    |
| CKM            | LQKRGTTGGVDTAAVGSVFDVSNADRLGSSEV       | -1.827153875 | 3.36E-05    |
| LDHB           | SLFLQTPKIVADKDYSVTANSKIVVVTAGVR        | -2.183325394 | 5.38E-07    |
| VIM            | RTYSLGSALRPSTSRSLYASSPGGVYATRSS        | -1.97757071  | 0.005664176 |
| MYH3;MYH1;M    | QEAKAELQRALSKANSEVAQWRKYETDAIQ;QEAK/   | -3.563627555 | 0.000787874 |
| SPTB           | STAINESQSIRVKAQSLPLPSLSPDASLGK         | -2.904724968 | 2.53E-07    |
| IGF2R          | KSVKALSSHLHGDDQDSEDEVLTIPVVKVHSG       | -1.576786095 | 0.000928246 |
| MYH7           | DQMNEHRSKAETQRSVNDLTSQRAKLQ TEN        | 1.559875481  | 0.001882597 |
| MYH7           | RILNPAAIPEGQFIDSRKGAEKLLSLDIDH         | -2.162736455 | 0.00291514  |
| MYH7           | ETVVGLYQKSSLLKLLSTLFANYAGADAPIEK       | 2.024181501  | 0.006018698 |
| DSP;DSP varian | VRRASSKGGGGYTCQSGSGWDEFTKHTVSEC        | -2.294407475 | 1.26E-05    |
| HIST1H1C       | _____MSETAPAAPAAAPPAEK                 | -2.496216503 | 0.00269425  |
| VCL            | ENACTKLVQAAQMLQSDPYSPVARDYLIDGS        | 1.728597859  | 0.002012899 |
| VCL            | VEKMTGLVDEAIDTKSLLDASEEAIKDKLDK        | 3.336464562  | 5.49E-06    |
| FLNA;FLJ00119  | KIPEISIQDMTAQVTSPSGKTHEAEIVEGEN        | 1.737766966  | 0.009384761 |
| VDAC1          | YQIDPDACFSAKVNNSLIGLYTQTLKPGI          | -1.89295373  | 0.000158919 |

|               |                                  |              |             |
|---------------|----------------------------------|--------------|-------------|
| TNXB;TNXA     | LSAEGTTGLAPAGQTSEESRPRLSQLSVTDV  | 2.625506687  | 0.002525007 |
| PLN           | MEKVQYLTRSARRASTIEMPQQARQKLQNL   | -5.03708535  | 5.55E-10    |
| ACTN2         | TKWVKVQLVPIRDQSLQEELARQHANERLR   | -2.836052141 | 0.000300204 |
| TXLNA         | GPERRPEGPGAQAPSSPRVTEAPCYPGAPST  | -3.307738437 | 0.000214183 |
| MAP1B         | PTPVVKQTKLKQRADSRESLKPAAKPLPSKS  | 3.623587952  | 0.000262008 |
| MAP1B;DKFZp6  | FEFSDAKDENERASVSPMDEPVPDSESPIEK  | 1.720961595  | 0.002188696 |
| RBM25         | HRPKIGLSLKLGNASNSPGQNSVVRKRLPVD  | -2.545685827 | 0.004641818 |
| RANBP2        | GSSTKCAACQNPRKQSLPATS IPTASFKFG  | -2.434241998 | 7.52E-08    |
| HNRNPM;HNR    | GIERMGLAMGGGGGASFDRAIEMERGNFGGS  | 2.639901197  | 0.000429116 |
| RRAD          | GGSRGGGQERERRRGSTPWGPAPPLHRRSMP  | -5.683289596 | 9.80E-08    |
| CDK18         | QNQRFRSMEDVSKRLSLPMDIRLPQEFLLQL  | -2.273388222 | 0.000182973 |
| DMTN          | SSLPAYGRTTSLRQLQSTEFSPSGSETGSPGL | -1.613622098 | 0.005550761 |
| AHNAK         | FDIKSPKFKAELPSPKLEGELQAPDLELS    | 2.827187322  | 1.29E-06    |
| AHNAK         | VDVTGREGAKDIDISSPEFKIKIPRHELTEI  | 2.778554817  | 0.000550012 |
| AHNAK         | PDWNLKMPKMKMPKFSVSGLKAEGPDVAVDL  | -2.904969411 | 2.02E-05    |
| AHNAK         | GKGGVTGSPEASISGSKGDLKSSKASLGSLE  | -3.68587059  | 5.87E-05    |
| AHNAK         | VEGDLKGPEIDIKGPSLDIDTPDVNIEGPEG  | 2.65769328   | 3.06E-06    |
| AHNAK         | VDVETQSGKTVIRLPSGSGAASPTGSAVDIR  | 1.870651099  | 0.002894342 |
| AHNAK         | PRLDFEGPDAKLSGPSLKMPLEISAPKVTA   | -2.306073515 | 3.63E-05    |
| CGNL1         | TKKTRPDVLPFRRQDSAGPVLGDARSRRSSS  | 1.532701553  | 0.008202179 |
| AKAP13        | LCQVSHPHTKLMRIPSFPPSPPEPPSPSAPS  | -2.448036237 | 0.003006491 |
| SNTB2         | GDSLPGSPSRGLGPPSPAPPGRPAGEAGAS   | 1.924193438  | 7.44E-11    |
| SNTB2         | SPPAPPGRPAGEAGASPPVRRVRVVKQEAGG  | 2.071051621  | 9.75E-09    |
| SNTB1         | AGAGHPGAGGAQPPDSPAGVRTAFTDLPEQV  | 1.588028493  | 0.000449314 |
| SCRIB         | TAKAERRHQERLRVQSPEPPAPERALSAPL   | 1.501608282  | 0.004320467 |
| DPYSL3        | RRGQGREESREPAPASPAPAGVEIRSATGKE  | 2.442526439  | 6.10E-06    |
| CTTN          | KLEEQARAKTQTPPVSPAPQPTTEERLPSSPV | 1.715808551  | 0.000841518 |
| PDE3A         | SAEMSGCSSKSHRRTSLPCIPREQLMGHSEW  | -2.19843255  | 2.15E-05    |
| LTBP1         | EYVLKPKYFPAQKGISGEQSTEGSFPLRYVQ  | 2.02910331   | 0.000600892 |
| NUMA1 variant | PRTQPDGTSVPGEPASPISQLPCKVESLES   | 1.814330315  | 0.000131432 |
| PLCL1         | EVTDEDEEAEMSRMSVDYNGEQKQIRLCRE   | -2.944327266 | 1.51E-06    |
| PLCL1         | DCVTAASGGRMRDRRSGVALPGAAGTPADSE  | -4.433287259 | 2.45E-09    |
| PCBP1         | QGRVMTIPYQPMPASSPVICAGGQDRCSDA   | -1.722272379 | 1.35E-05    |
| TRIP10        | PLGGPVPSALPNGPPSPRSGRDPLAILSEIS  | -1.723075385 | 0.002905644 |
| SPEG          | DQFPLTRSRAIQECRSPVPPPAADPPEARTEK | 1.769138852  | 0.00355755  |
| SPEG          | PLFSRPSTPKTSRAVSPAAAQPPSPSSAEKP  | 1.85916749   | 0.004494924 |
| SPEG          | QPKSERGAPWGTGASQEELRAPGSVAERRR   | -2.445352977 | 0.00351961  |
| SPEG          | PAAGASPRRGELRRGSSAESALPRAGPRELG  | -2.056208181 | 0.008908071 |
| SPEG          | IPVARLGARRLQESPLSALSEAQSPSPARP   | 2.324033515  | 3.30E-05    |
| SPEG          | SSARGSPVLAMRRRLSFTLERLSSRLQRSGS  | -1.654783447 | 0.004749033 |
| ZYX           | QHPVPPPAQNQNQVRSPPGAPGLTLKEVEEL  | 4.150097718  | 2.80E-08    |
| SGCB          | ____MAAAAAAAAAEQSSNGPVKSMREKAVE  | 2.064709354  | 0.00613071  |
| SMTNL2        | GKGKGEARARLKRSQSFQVASSIKILLE     | -4.606851282 | 4.77E-08    |
| MYLK3         | GTEPGEQTPEGARELSPLQESSPPGGVKAEE  | 2.016336207  | 0.002982787 |
| MAP7D1;RPRC:  | SKRRASNEKESAAPASPAPSPAPSPPTAPPQ  | 1.904900839  | 8.87E-06    |
| MAP7D1;RPRC:  | MGPRDARPPRRSSQPSPTAVPASDSPTKQE   | 2.402806844  | 7.99E-08    |
| GNG12         | KASADLMSYCEEHARSPELLIGIPTSENPFK  | 1.883526944  | 0.002132442 |

|               |                                  |              |             |
|---------------|----------------------------------|--------------|-------------|
| PDLIM3        | QSGSFRVLQGMVDDGSDDRPAGTRSVRAPVT  | 2.491035757  | 4.37E-05    |
| TEX264        | GSRETSAAATLSPGASSRGWDDGDTRSEHSYS | 2.269299005  | 0.000385115 |
| SH3KBP1       | FGDIFKDKPIKLRPRSIEVENDFLPVEKTIG  | 1.9815109    | 0.00314546  |
| PLEKHA1       | GPGRSASSMRQARRLSNPCIQRSIPPVLQNP  | -2.394672409 | 1.51E-05    |
| PERM1         | ELGPGPAGAPEPGPRSPVQEDRPGPGLGLST  | 2.349263609  | 0.00010395  |
| KANK2         | PRLSSLPRGPGSWWTSTESLCSNASGDSRHS  | -2.00161168  | 0.002589576 |
| KANK3         | SPGRGVPRSPRSGRSPAPNLAPASPGPAQ    | 2.35435615   | 3.27E-07    |
| KANK3         | PGRGVPRSPRSGRSPAPNLAPASPGPAQL    | 1.746974878  | 0.005005869 |
| FIP1L1        | RERERTRERERERDHSPTPSVFNSDEERYRY  | 1.77506603   | 0.004577323 |
| XIRP1         | GGGSDPRIPAAPRKVSREEQALPRGLPGGWV  | -1.861705023 | 0.0006012   |
| XIRP1         | GTRMLFETRPLDRLGSRPSLQEQSPLELRSE  | -2.133278838 | 6.87E-06    |
| XIRP1         | MLFETRPLDRLGSRPSLQEQSPLELRSEIQE  | -2.309237472 | 2.26E-09    |
| TAOK1         | YREEGDPTRASDPQSPQVSRHKSHYRNRE    | 3.207351232  | 2.91E-07    |
| HUWE1         | LTHPPPIMGGVVRDLMSSEEDQMMRAIAMSL  | -1.688413543 | 0.004413574 |
| PHLDB2;DKFZp1 | LAGESDRVFATRNFSCGSVEFDEADLESLR   | -2.324189441 | 0.000113619 |
| PHLDB1;KIAA06 | TFSDGLATRTLQPPESPRLGRRGLDSMRELP  | 2.833513615  | 1.53E-07    |
| PACS2         | LKERQAARPQNERANSLDNERCPDARSQLQI  | -2.144447199 | 3.47E-07    |
| P2RY8         | GCRRVPRDTLDRRESLFSARTTTSVRSEAGA  | 1.983130921  | 0.002509547 |
| PPFIBP1       | GSKALEYSNGIFDCQSPTSPFMGSLRALHLV  | -1.764335623 | 0.000493539 |
| CMYA5         | KLPPERFFQKPVSGLSVEQVKSETISSSVKT  | 1.782162866  | 0.002617551 |
| SYNPO         | LKENAALLTANGLHLSQNREAQQSSPAPPPA  | 5.392838502  | 8.41E-12    |
| DCLK2;MGC454  | SSSNVNGGPELDRCSPEGVNGNRCSESSTL   | 1.878651137  | 0.000132135 |
| FAM160A2      | LQGRDGLGAGLGLSGGSPGASTPVLLTRGGAP | -1.726306268 | 0.000286943 |
| BVES          | SDSDDGLHQFLRGTSMSLHVSSPHQRASA    | -2.731774142 | 0.000186396 |
| NAV1          | KSSGIPVKPVNGRKTSLDVSNSAEPGFLAPG  | -2.426919409 | 1.04E-05    |
| TPM3          | KAISEELDHALNDMTS_____            | 1.714988938  | 0.009358663 |
| PPP1R13L      | ARVLAIEIPRPLKRRGSMEQAPAVALPPTHKK | -2.458423646 | 0.001949186 |
| PALLD         | ESKNTDFFPGLSAFLSQEINKSLDLARRAI   | 2.804573532  | 0.001689967 |
| PALLD         | SGHPHVRRPRSRSDSGDENEPQERFFRPH    | -2.992353548 | 1.11E-07    |
| CASKIN2       | SLADNLSHRPLANCRSGEQIFTQDVRPEQLL  | 1.603950657  | 0.000227076 |
| CASKIN2       | PRVGLSPDSPAGDRNSVSGSESVGSIRSAGS  | -2.008634661 | 0.003255205 |
| TTN;DKFZp451f | ETREQQEIHKEKIPSPETLQPDTHNISKS    | -1.684583529 | 0.000210661 |
| TTN;DKFZp451f | HRGDVQEADTLHRQLSLSQCFLLMTEEQQN   | -4.113761054 | 1.30E-06    |
| PHKB          | SWKVLERRARTKRSGSVYEPLKSINLPRPDN  | -3.161259507 | 8.19E-05    |
| IRS2          | MDRPLSHCGRSYRRVSGDAAQDLDRGLRKRT  | -3.415955612 | 1.44E-06    |
| FAM129B       | APAGESPQKAAPEASSPPASPLQHLLPGKA   | 1.813101345  | 0.003932352 |
| FAM129B       | SPQKAAPEASSPPASPLQHLLPGKAVDLGP   | 2.1353939    | 0.000107017 |
| PKP2          | EGRWGRGTAQYSSQKSVEERSLRHPLRLEI   | -1.549499548 | 0.005248754 |
| PKP2          | ERAHYTHSDYQYSQRSQAGHTLHHQESRRAA  | -2.695103157 | 0.00275447  |
| PKP2          | YSQRSQAGHTLHHQESRRAALLVPPRYARSE  | -3.339514235 | 2.61E-05    |
|               | PGPGGPYPRPLRRIISVEEDPLPQLLDGGFE  | 1.937584833  | 0.004187405 |
| FUNDC2        | _____METSAPRAGSQVVATTARHSAAYRA   | -2.053918031 | 0.000562801 |
| SORBS1        | ASIYNTDHLALSPRASPSLSLPHLSWSDR    | -4.117764948 | 0.001925283 |
| SORBS1        | GKSSVLTNEKMSRDISPEIDLKNEPWYKFF   | 2.729450559  | 7.70E-08    |
| SORBS1        | RGGEQAGRKAARRGGSQSHSLRAGPDLTE    | 3.026786653  | 0.000800604 |
| TNKS1BP1      | VSQCPEPGLRHNGSLSPGLEARDPLEARELG  | 1.702332324  | 0.001058247 |
| NUCKS1;NUCKS  | PVRNRKVVDYSQFQESDDADEDYGRDSGPPT  | 2.058439371  | 2.43E-05    |



|                |                                          |              |             |
|----------------|------------------------------------------|--------------|-------------|
| DCTPP1         | _____MSVAGGEIRGDTGGEDT                   | -1.734000356 | 0.004223817 |
| RTN4           | PPSTPAAPKRRGSSGSVDETLFALPAASEPV          | 2.159557438  | 0.001117595 |
| SERINC1        | SNNSQVNKLTLSDESTLIEDGGARSDGSLE           | -1.900314473 | 0.001262649 |
| C9orf78        | RPLRVGDTEKPEPERSPPNRKRPAANEKATDD         | -1.76606633  | 0.004782188 |
| SIPA1L2        | AVNPNTGAALHREYGSTSSIDRQGLSGENFF          | 2.67898288   | 0.000506066 |
| TJP2           | FGPSRDRDRDRSRGRSIDQDYERAYHRAYPD          | -1.877164974 | 5.41E-07    |
| TJP2           | VVKRPRKVQVAALQASPLDQDDRAFEVMDE           | -1.746828808 | 1.11E-05    |
| TJP2           | SRLNSHGGRSRWEDSPERGRPHERARSRER           | -2.675108703 | 0.000100947 |
| PLCL2          | NKPGTENADVQKPRRSLEVIPEKANDETGE_          | -2.295805984 | 3.13E-08    |
| SRRM2;KIAA03   | PRVPLSAYERVSGRTSPPLDRARSRTPPSA           | 1.846370244  | 5.59E-06    |
| TLN1           | VLVEDTKVLVQNAAGSQEKLAQAAQSSVATI          | 2.475617245  | 0.000490124 |
| TLN1           | SQLVACTKVVAPTISSPVCQEQLVEAGRLVA          | 2.625421423  | 9.20E-06    |
| LRRFIP2        | VVSAADYFSRSNRRGSVVSEVDDISIPDLSS          | -1.64981079  | 0.00619502  |
| ARFGEF2        | IQSKPQSPVIQAAVSPKFVRLKHSQAQSKP           | 1.950250049  | 0.003582029 |
| TNS1           | ESLVASRSPQPLAETPIPSLPEFPRAASQQ           | 1.758762776  | 4.66E-05    |
| CAMK2B         | VCQRSTVASMMHRQETVECKKFNARRKLGK           | -1.752010315 | 0.000224358 |
| ACTA2;ACTC1;A  | SSLEKSYELPDGQVITIGNERFRCPEALFQP;SSLEKSYE | -2.068083967 | 0.001847056 |
| SYNRG          | ANRTTPGKLTKEELYTVLAMIAVTQRGVPAM          | 1.900445381  | 0.00482415  |
| SRRM1          | SASPPRRRHRPSPPATPPPKTRHSPTPQQSN          | -2.408998012 | 0.000850291 |
| PCYT1A         | ERSPSPSFRWPFSGKTSPPCSPANLSRHKAA          | -1.868242499 | 0.001723485 |
| SORBS2         | AVGPPRGLGDQASARTSPGRVDLPGSSTTLT          | 2.225088809  | 0.00856326  |
|                | SRTSPGRVDLPGSSTTLTKSFTSSSPSPSR           | 3.530075106  | 0.005020146 |
| MAPK3;DKFzP6   | LARIADPEHDHTGFLTEYVATRWRAPAEIML          | 2.677519576  | 0.000768179 |
| PGM1           | SCIIRKIKAIIGGIILTASHNPGGPNDFGIK          | -4.486660993 | 0.002268711 |
| SYNPO2L        | PLPMAPKTPPMTPKTPPPVAPKPPSRGLLD;PPPM#     | 3.119518596  | 3.07E-16    |
| C2orf18;SLC35F | LAESEQERLLGGTRTPINDAS_____               | -2.740808517 | 0.004124446 |
| SORBS2         | SRTSPGRVDLPGSSTTLTKSFTSSSPSPSR           | 4.773294578  | 0.000626263 |
| SORBS1         | SQPARASGSFAPISQTPPSFPPPLVPPAP            | 4.515628963  | 0.002204205 |
| FARP1          | TPGSRLGAPENSGISTLERGQKPPPTPSGKL          | 2.023332328  | 0.001995405 |
| TTN            | PIRHSPSPVRHVRAPTSPVRSVSPAARIST           | -3.427838368 | 0.000407728 |
| TTN            | FTLIQKARVTEKAVTSPPRVKSPPEPRVKSP          | -3.474443879 | 1.06E-06    |
| MYH6;MYH7      | KMRRDLEEATLQHEATAAALRKKHADSV AEL         | -3.110109225 | 6.50E-07    |
| MYH6;MYH7      | QARIEELEELEAERTARAKVEKLRSDLSRE           | -1.879897053 | 0.000434507 |
| MYH6;MYH7;M    | NSSRFGKFIRIHFGATGKLASADIETYLLEK          | -7.980209021 | 7.35E-06    |
| MYH6;MYH3;M    | HAELEASQKESRSLSTELFKIKNAYEESLDQ;QAELEAA  | -2.102696217 | 3.43E-06    |
| MAP1A;M1LP     | SRAIRGEKELSSEPQTTPPAQKGTVPLPTISG         | 1.730790859  | 0.003897752 |
| LDB3           | PSPSPEARASPGTGPTELPTFSPAFSRPS            | 2.074362181  | 0.000106753 |
| OBSCN          | LWEALARKRRMSREPTLDSISELPEEDGRSQ          | 3.54938228   | 1.48E-05    |
| LMNB2          | ATMATPLPGRAGGPATPLSPTRLRLQEKEE           | 1.941852599  | 0.004542641 |
| KIF1C          | YPAQRPPGPRYPPTYTPPRMRRQRSAPDLKE          | 2.452497339  | 5.60E-07    |
| PPP1R12B       | LRKARSRQARQTRRSTQGVTLTDLQEAERTF          | -3.459884854 | 8.34E-07    |
| SPAG9          | ISLGIFPLPAGDGLLTPDAQKGETPGSEQW           | -2.211553679 | 0.003857814 |
| STK10          | MFFKLSEEAECNPSTPSKAAKFFPYSSADA           | 2.145003815  | 1.34E-06    |
| MB             | MKASEDLKKHGATVLTALGGILKKKGHHEAE          | -3.305011865 | 1.84E-05    |
| CKM            | KFEEILTRLRLQKRGTTGGVDTAAVGSVFDVS         | -1.90096217  | 0.000451705 |
| CKM            | RRAVEKLSVEALNSLTGEFKGKYYPKSMTE           | -2.169246557 | 0.007037034 |
| MYH7           | TVVGLYQKSSLKLLSTLFANYAGADAPIEKG          | -3.046181946 | 0.000552465 |

|               |                                 |              |             |
|---------------|---------------------------------|--------------|-------------|
| CKMT2         | RFSKILENLRQKRGTTGGVDTAAVADVYDIS | -1.896207735 | 6.09E-05    |
| CKMT2         | LKGDLAGRYKLESEMTEQDQQLIDDHFLFD  | -3.148481638 | 1.85E-07    |
| PLN           | EKVQYLTRSAIRRASTIEMPQQARQKLQNL  | -2.095979742 | 0.000183583 |
| PLEC;PLEC1    | SDARKLTFRGLRQKITMEELVRSQVMDEATA | -2.307034957 | 0.000271342 |
| MURC          | AARPVYPPHEGREIPTPEPLKVTFKSQVKVE | 2.413886569  | 0.004806476 |
| XIRP1         | QATSRKFEEGFSANSTDQEPTRPQGGGDVR  | -2.34131538  | 0.00023581  |
| RRAGC         | VFHKMSPNETLFLESTNKIYKDDISNSSFVN | -2.639784529 | 0.000639989 |
| RRAGD         | VFHKMSPNETLFLESTNKICREDVSNSSFVN | -2.613655345 | 0.001291004 |
| MAPK1         | RVADPDHDHTGFLTEYVATRWYRAPEIMLNS | 5.468904752  | 1.34E-07    |
| ACTA2;ACTC1;A | RDLDYLMKILTERGYSFVTTAEREIVRDIK  | -2.811088739 | 3.91E-09    |
| HEL-S-54e;PHB | GLIELRKLEAAEDIAYQLSRNRNITYLPAGQ | -4.517673167 | 6.26E-08    |
| MAPK3;DKFZp6  | RIADPEHDHTGFLTEYVATRWYRAPEIMLNS | 3.256974744  | 0.000188087 |
|               | _____MGNHELYMRRRKPDITIEVQQMK    | 2.184030725  | 6.47E-08    |
| TTN           | KTSWKVDQLQEGCSYYFRVLAENEYIGLPA  | -2.015949958 | 0.000356239 |
| VPS13A        | _____LYSILAFIDNFQAAKQA          | 2.032878375  | 0.000618983 |
| ANK2          | SLPSSQFLDGMNYLRYSLGGRSDSLRSFSS  | 3.014544092  | 4.69E-08    |
| MYH7          | EKEALISQLTRGKLYTQQLDLKRQLEEEV   | -3.104335115 | 2.13E-09    |
| CKMT2         | KRGTGGVDTAAVADVYDISNIDRIGRSEVEL | -1.888042662 | 1.98E-09    |
| USP48         | ERRLVSKAWSKLQYFPKAPFPYKECCS     | -2.048568764 | 0.006013615 |
| DYRK2;DYRK4   | IDFGSSCYEHQRVYTYIQSRFYRAPEVILGA | 3.51465102   | 7.84E-08    |

**Supplemental Table S5**

| Gene    | Sequence                                             | FC          | p-value   |
|---------|------------------------------------------------------|-------------|-----------|
| ABLIM1  | RQSLGESPRTLSPTPSAEGYQDVRDRMIHRS                      | -1.54016165 | 0.0044773 |
| ACIN1   | ASLVALPEQTASEEETPPPLLTKEASSPPPH                      | 1.518451472 | 0.0023391 |
| ACTC1   | SSLEKSYELPDGQVITIGNERFRCPEALFQP;SSLEKSYELPDGQVITIGNE | 2.491970069 | 0.0057501 |
| AHNAK   | VDIKAPDVEGQGLDWSLKIPKMKMPKFSMPS                      | 2.153547875 | 0.0086724 |
| AHNAK   | SGSKGDLKSSKASLGSLEGEAEAEASSPKGK                      | 1.57410079  | 2.29E-05  |
| AHNAK   | PKADIDVSGPKVDIDTPDIDIHGPEGKLGKGP                     | -2.64786859 | 0.0008281 |
| BRD3    | TTTTPTTSAITASRSESPPLSDPKQAKVVAR                      | 2.948331636 | 7.966E-05 |
| C5AR1   | RKSLPSLLRNVLTEESVRESKSFTRSTVDT                       | 2.66674505  | 0.0002993 |
| CACNA1C | LRTLHDIGPEIRRAISGDLTAEELDKAMKE                       | 3.621025874 | 6.391E-05 |
| CALD1   | DKEKEEEEEKPKRGSIGENQIKDEKIKKDK                       | 3.784544831 | 0.0001845 |
| CAST    | _____MSQPGQKPAASPRPRAAAARRTHEH                       | -3.86178751 | 0.0013695 |
| CAV1    | _____MSGGKYVDSEGHLYTVP                               | 1.94879169  | 0.0081726 |
| CAV1    | _____MADELSEKQVYDAHTKEIDL                            | 1.63354092  | 0.0003383 |
| CDK18   | _____MNKMKNFKRRFSLVPRTEIEESLAE                       | 2.297244314 | 0.0012044 |
| CDK18   | QNQRFSMEDVSKRLSLPMDIRLPQEFQLKL                       | 2.428522652 | 0.0066386 |
| cDNA    | TPPDFFFPEPTCLSASPPNAPPRQSKRQGR                       | 1.505543215 | 0.004946  |
| cDNA    | RRIGTNLPLKPCARASFETLPNISDLCLRDV                      | 3.421981955 | 0.0012043 |
| CLASP1  | SLRGVTEAIEKFSFRSQEDLNEPIKRDGKKE;SLRGVTEAIEKFSFRSQEDI | 2.394451841 | 0.0078506 |
| CLASP1  | GTTTKAEGRIRTRRQSSGSATNVASTPDNRG;PGSYASLGRIRTRRQSS    | -2.07183475 | 0.0006222 |
| COBL    | VNKRSNSKGCLTTPNSPSMHSRSLTLGPSLS                      | -2.54939231 | 0.0024835 |
| CPEB4   | QQEQQDPLEKQQLSPSPGQEAGILPETEKAK                      | 2.000732745 | 0.0049171 |
| CTNNA1  | ELDDSDFETEDFDVRSRTSVQTEDDQLIAGQ;LEDDSDFEQEDYDVRSF    | -2.73150382 | 0.0011938 |
| CTNNA1  | DSDFEQEDYDVRSRTSVQTEDDQLIAGQSAR;DSDFETEDFDVRSRTSV    | -2.28716236 | 0.0012315 |
| CTNNA1  | FEQEDYDVRSRTSVQTEDDQLIAGQSARAIM;FETEDFDVRSRTSVQTE    | -2.44250726 | 0.0003752 |
| DIP2C   | _____MADRSLGEMALPLEVRARLA                            | 1.668328037 | 0.0071208 |
| DNAJB6  | SAAGVQREAAVEQAQSETSLGARGQRGHKPR                      | -5.07292175 | 2.999E-05 |
| DPYSL3  | RRGQGREESREPAPASPAPAGVEIRSATGKE                      | -2.12926071 | 0.0043994 |
| DTX3L   | _____MASHLRPPSPLLVRVYKSGPRVRR                        | 2.219650982 | 0.0085004 |
| DYRK2   | IDFGSSCYEHQRVYTYIQSRFYRAPEVILGA                      | 2.116905067 | 0.00041   |
| EBAG9   | FLKRLICRSGRGRKLSGDQITLPTTVDYSSV                      | 1.885982647 | 0.0005482 |
| FLNC    | PYTVAVKYADQEVPRSPFKIKVLPADHASKV                      | 2.307129732 | 0.0001125 |
| FLNC    | TRGETKREVRVEESTQVGGDPFPAVFGDFL                       | -3.52425721 | 0.000914  |
| GIGYF1  | RSRGRGRGDSCFYQRSIEEGDGAFGRSPREI                      | 1.995042765 | 0.0002794 |
| GOSR1   | CTSYSHSSTRDGRRDSSDTPLLNGSSQDRM                       | -1.60005739 | 0.0065201 |
| GPS1    | SARVDSHSKSPPREGSQGELTPANSQSRMST                      | 1.903417261 | 0.004036  |
| HDAC7   | LPLAQGGHRPLSRAQSSPAAPASLSAPEPAS                      | 2.040621936 | 0.0075275 |
| HRC     | HHHHHRVPREEDEEVSaelGHQAPSHRQSHQ                      | -4.52326455 | 0.0006806 |
| HSPH1   | NTCEPVVTQPKPKIESPKLERTPNGPNIDKK                      | -6.09503773 | 0.0006071 |
| JUN     | DGLLASPDGLLLKLASPELERLIQSNGLVT;SDLLTSPDVGLLKLASPELE  | 1.723460454 | 0.0033274 |
| LDB3    | LRPTFSPAFSRPSAFSSLAEASDPGPPRASL                      | -3.6241252  | 0.0025356 |
| LDB3    | PVIPHQKDPALDTNGSLVAPSPSPEARASPG                      | -3.3438338  | 0.0038156 |
| LDB3    | SSNLQSRFRILAQMTGTEFMQDPDEEALRR                       | -2.12759936 | 0.0047944 |
| LIMCH1  | RRKKSPREHFQAGPFSPCSPTPPGQSPNRSI                      | 2.050409014 | 0.0019123 |
| LMO7    | TTGVATTQSPTPRSHSPASQSGSQLRNRSV;TTGVATTQSPTPRSHSP     | -3.0418378  | 0.0069079 |
| LRRC10  | KVAKGVRVGRWAEETPEPDPKARRYLVR                         | 3.21443751  | 0.0047642 |
| MAP1A   | AGRNTSAEKELSSPISPKSLQSDTPTFSYAA                      | 2.185956476 | 0.0003688 |

|          |                                  |             |           |
|----------|----------------------------------|-------------|-----------|
| MAP4     | TRPKPARVPPELLGGSPWKTLDHRLGHCSL   | 2.168495886 | 0.0047227 |
| MAPK14   | LDFGLARHTDDEMTGYVATRWRRAPEIMLNW  | -2.93744985 | 0.0085231 |
| MOT2     | SKHSEDVNVKVSNAQSVTSETNI_____     | -2.07325563 | 0.0057389 |
| OBSCN    | TDTVSYVFRNMMKLSSIDLNDQVEGDDRAFE  | 3.291823972 | 0.0053965 |
| PALLD    | ESKNTDFFPGLSAFLSQEEINKSLDLARRAI  | -2.41001281 | 0.0078956 |
| PCDH7    | SQPKLSTFMPVDERGSQEKLANGEAAIMGDR  | -1.96821492 | 0.0058484 |
| PDLIM2   | RSSYSSPTLSPRAGSPFPPSSSSLTGEA     | 2.577056208 | 0.0069223 |
| PEAK1    | NAYDNLAIYKSFLGTSGELSVKEKTTSVISH  | 2.390188529 | 3.9E-06   |
| PGRMC1   | LYKIVRGDQPAASGSDDDDEPPPLPRLKRRD  | -2.03103445 | 0.0010997 |
| PKP2     | PVTQNRASRSSHQSSFHSTRTLREAGPSVA   | 2.994297674 | 0.0076825 |
| PKP2     | TATYEGRWGRGTAQYSSQKSVEERSLRHPLR  | -3.93606777 | 3.375E-05 |
| PKP2     | ATYEGRWGRGTAQYSSQKSVEERSLRHPLRR  | -3.44831711 | 0.002791  |
| PKP2     | VEERSLRHPLRRLEISPDSSPERAHYTHSDY  | -2.08331617 | 0.0079287 |
| PKP2     | YQLEAELPEKYSQNIYIQNRNIQTDNNSIG   | -3.18370999 | 0.0010427 |
| PLEKHF1  | AAQQRQEEAEEQGAGSPGQPAHLARPICGAS  | 2.123755999 | 0.0088387 |
| PLN      | MEKVQYLTRSAIRRASTIEMPQQARQKLQNL  | -3.46551782 | 7.654E-06 |
| PLN      | EKVQYLTRSAIRRASTIEMPQQARQKLQNLF  | -3.52910591 | 0.0035961 |
| PROB1    | RAAGAPRPRLLLRTGSLDESGLPLQAAAGFV  | -3.82485758 | 0.009781  |
| PTPN21   | ANSTPDLRHLIYSSSNPDLITRRVHHSVQT   | 2.148004156 | 0.008291  |
| RBM20    | QMSSPKPAERARQSPFVDDCKTRGTPEDG    | 2.621305531 | 5.229E-05 |
| RBM25    | HRPKIGLSLKLKASNSPGQNSVKRKKLPVD   | -3.66651252 | 0.0019576 |
| RBM39    | SRRRSRSKSPFRKDKSPVREPIDNLTPEERD  | 5.695442054 | 0.0003854 |
| SHRM3    | SSEPEREPEWRDRPGSPESPLLDAPFSRAYR  | 3.248687505 | 2.085E-07 |
| SKIV2L   | TVSASPCSAPLARASSLEDLVLKEASTAVST  | 2.306059859 | 0.0005897 |
| SLC25A46 | RDEQGFGGAFPARSFSTGSDLGHWVTTPPDI  | 3.579270124 | 0.006923  |
| SLTM     | SEASKPKDGQDAIAQSPEKESKDYEMNANHK  | -1.64159549 | 0.0072128 |
| SORBS1   | ASGSFAPISQTPPSFSPPPPLVPPAPEDLRR  | 1.722244942 | 0.0090703 |
| SORBS3   | _____MADGGSPFLGRRDFVYPSSTR       | 2.237728096 | 0.0026207 |
| SPTAN1   | VATFNSIKELNERWRSLQQLAEERSQLLGSA  | 2.166070767 | 0.0081811 |
| SPTBN1   | KGEQVSQNGLPAEQGSPRMAETVDTSEMVNG  | -1.57419682 | 0.0060635 |
| SRRM1    | PSPPRRRRSPSPRRYSPPIQRRYSPSPPKR   | 3.611219376 | 0.0013217 |
| SYNPO2   | SPIADFPAPPYSAVTPPPDAFSRGVSSPIA   | 2.53823614  | 0.0074763 |
| TJAP1    | PQPNGECHSLGTARGSPPEELPLPAFEKLN   | 2.312887084 | 0.0080029 |
| TJP1     | RSPDQRSEPSDHSRHSPPQPSNGSLRSRDEE  | -1.80567004 | 0.009641  |
| TLR3     | KIQALKSEELDIFANSSLKKLELSSNIKEF   | -2.01196571 | 0.0014027 |
| TNS1     | PLRRRAASDGQYENQSPEATSPRSPGVRSPV  | 2.042624773 | 9.696E-07 |
| TNS1     | SPQARHRTVGTNTPPSPGFRRAINSSMAAP   | 6.133154098 | 0.0032638 |
| TPM2     | KAISEELDNALNDITSL_____           | 3.769615665 | 0.0006977 |
| TTN      | TPSPIEAERRKLRPGSGGKPPDEAPFTYQL   | 1.996450752 | 0.0071223 |
| TTN      | KAQLARQQSPSPIRHSPSPVRHVRAPTSPV   | -4.16266032 | 0.0080773 |
| TTN      | QLPHKTPPRIPPKRSPTPPSIAAKAQLA     | -11.864028  | 0.0004072 |
| TTN      | KTPPRIPPKRSPTPPSIAAKAQLARQQS     | -1.61577152 | 0.0029269 |
| TXLNA    | GPERRPEGPGAQAPSSPRVTEAPCYPGAPST  | -2.98204452 | 0.0082844 |
| WDR44    | TFKETENTAYKVGNESPVQELKQDVSKKIIIE | 2.203541486 | 0.0046304 |
| YAP1     | VRAHSSPASLQLGAVSPGTLTPTGVVSGPAA  | 1.991670092 | 0.0076527 |
| ZYX      | QHPVPPPAQNQNQVRSPGAPGPLTLKEVEEL  | 2.350837417 | 0.0041595 |
|          | YKTAPGKIEKVKPPSPPTTEGPSLQPDLAPE  | 1.779699986 | 0.0021601 |
